# Supplementary material for: An expeditious synthesis of 6,7-dihydrodibenzo[b,j][4,7] phenanthroline derivatives as fluorescent materials
Source: Royal Society of Chemistry journal article supplement (doi:10.1039/d2ra05198b), 2022-01-01
Supplement: d2ra05198b1.pdf [file d2ra05198b1.pdf]

## An expeditious synthesis of 6,7-Dihydrodibenzo[b,j][4,7] phenanthroline derivatives as fluorescent materials

Kevin George, and Sathananthan Kannadasan\*

Department of Chemistry, School of Advanced Sciences, VIT, Vellore-632014, India; E-mail: [kannadasan.s@vit.ac.in](mailto:kannadasan.s@vit.ac.in)

### 1. General remarks

All the reactions were carried out in oven-dried glassware. Progress of reactions was monitored by Thin Layer Chromatography (TLC) while purification of crude compounds was done by column chromatography using Silica gel (Mesh size 100-200). The NMR spectra were recorded on Bruker-400 MHz NMR spectrometer (400 MHz for <sup>1</sup>H NMR and 100 MHz for <sup>13</sup>C NMR) with CDCl<sub>3</sub> or (CD<sub>3</sub>)<sub>2</sub>SO as the solvent and TMS as an internal reference. Integrals are in accordance with assignments; Coupling constants were reported in Hertz (Hz). All <sup>13</sup>C spectra are proton-decoupled. Multiplicity is indicated as follows: s (singlet), d (doublet), t (triplet), q (quartet), m (multiplet), dd (doublet of doublet), br s (broad singlet). FTIR spectra were recorded on a Perkin-Elmer RX-IFT-IR and absorbencies are reported in cm<sup>-1</sup>. HRMS analyses were recorded using Q-T of Micro mass spectrometer (different mass analyses based on the availability of instruments). Yields refer to quantities obtained after chromatography. Absorption spectra were recorded using JASCO V-670 spectrophotometer. Steady-state fluorescence spectra were recorded on Hitachi F-7000 FL spectrofluorophotometer by excitation at the respective absorption maxima. Quantum yields of compounds were estimated by comparison with the known quantum yields of anthracene in ethanol (Φ = 0.27) at an excitation wavelength of 246 nm using the following equation.

$$\Phi_f = \Phi_{fR} \cdot I/I_R \cdot OD_R/OD \cdot n^2/n_R^2$$

where Φ is the quantum yield, I is the integrated intensity, OD is the optical density, and n is the refractive index. The subscript R refers to anthracene.

The molar extinction coefficient (ε) was calculated using Beer–Lambert’s law

$$A = \epsilon cl$$

The Stoke’s Shift was calculated using the following equation.

$$\Delta \bar{\nu} = 10^7/\lambda_{\max(\text{Absorption})} - 10^7/\lambda_{\max(\text{Emission})}$$

## Experimental Procedures

### **Synthesis of 1-(2-Amino-5-bromophenyl)ethanone:**<sup>1</sup>

To a stirred solution of 1-(2-aminophenyl)ethanone (0.5 g, 3.7 mmol) in 5.0mL of CH<sub>3</sub>CN at 0 °C was added dropwise *N*-bromosuccinimide (0.66 g, 3.7 mmol) dissolved in 5.0mL CH<sub>3</sub>CN. Allowed the mixture to attain room temperature, and continued to stir at room temperature for 3 hours. Removal of the solvent under reduced pressure and purification through a column of silica gel (petroleum ether: ethyl acetate = 5: 1) afforded 1-(2- amino-5-bromophenyl)ethenone as a yellow solids. M. P: 86-88 °C.

### **Synthesis of 1-(2-Amino-3,5-dibromophenyl)ethanone:**<sup>2</sup>

To a stirred solution of 1-(2-aminophenyl)ethanone (0.5 g, 3.7 mmol) in 5.0mL of CH<sub>3</sub>CN at 0 °C was added dropwise *N*-bromosuccinimide (1.32 g, 7.4 mmol) dissolved in 10.0mL CH<sub>3</sub>CN. Allowed the mixture to attain room temperature, and continued to stir at room temperature for 3 hours. Removal of the solvent under reduced pressure and purification through a column of silica gel (petroleum ether: ethyl acetate = 5: 1) afforded 1-(2-Amino-3,5-dibromophenyl)ethenone as a brown solids. M. P: 129-131 °C.

### **General procedure for the synthesis of compound 3 a-d :**

2-Aminoarylketone **1** (2.0 mmol) and 1,4 cyclohexanedione **2** (1.0 mmol) were mixed with the given amount of *p*-TsOH and introduced into a test tube (10.0mL). The reaction mixture was kept in a preheated oil-bath for 120 sec at 100 °C. When the reaction was completed (Initially, the reaction mixture turned to clear liquid at the preheated conditions. Then, immediately the product was precipitated. The completion of the reaction could be monitored by TLC), it was cooled to room temperature, and water (3.0mL) was added to the reaction mixture. The resulting suspension was neutralized by adding sodium bicarbonate to it. Then the mixture was stirred for 5 min and the solid was collected by Büchner filtration, washed with H<sub>2</sub>O (6.0 mL ×3), and dried in a desiccator to give the desired product.

### **General procedure for the synthesis of compound 6 a-k :**

A mixture of compound **3 b,c** (0.191 mmol), arylboronic acids (0.229 mmol), Pd(OAc)<sub>2</sub> (20 mol%) and K<sub>2</sub>CO<sub>3</sub> (0.229 mmol) in 3.0 mL of DMF-H<sub>2</sub>O (2:1) was stirred at 100 °C for 3 hours. After completion of the reaction (monitored by TLC), the residue was extracted with EtOAc and washed with saturated brine. The organic layer was dried over anhydrous Na<sub>2</sub>SO<sub>4</sub> and purified through a silica gel column

chromatography by gradient elution using EtOAc: hexane to afford the desired compounds in very good yields.

**NBS bromination of compound 3a:**

Treat a solution of 13,14-dimethyl-6,7-dihydrodibenzo[b,j][4,7] phenanthroline (310 mg, 1.0 mmol) in acetonitrile (10.0mL) with *N*-bromosuccinimide (356 mg, 2.0 mmol). Stir the mixture at 80 °C for 3 hours. The reaction mixture was cooled to room temperature. Evaporated the solvent under reduced pressure and the compound was extracted with ethyl acetate. The organic phase was washed with water. Purified the compound by passing through column of silica gel (10% EtOAc/Hexane).

**General procedure for the synthesis of compound 8 :**

A mixture of compound 3 b (0.191 mmol), 2,3-dimethylaniline (0.229 mmol), Pd(dppf)<sub>2</sub>Cl<sub>2</sub> (10 mol%), SPhos (20 mol%), and NaO*t*-Bu (0.916 mmol) in 4.0mL of 1,4-Dioxane was Stirred at 110 °C for 12 hours. After the reaction was completed (monitored by TLC), the residue was extracted with EtOAc and washed with saturated brine. The organic layer was dried over anhydrous Na<sub>2</sub>SO<sub>4</sub> and purified through a silica gel column chromatography by gradient elution using EtOAc: hexane to afford compounds in very good yields.

## Spectral data of Synthesised derivatives

*13,14-dimethyl-6,7-dihydrodibenzo[b,j][4,7]phenanthroline (3a)*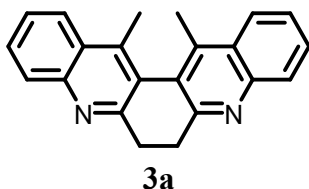

**Nature:** White powder; **Yield:** 94%; **Rf (50% EtOAc-Hexane):** 0.46, **M. P:** 298-300 °C.

**FTIR(KBr)** $\nu_{\max}$ : 827, 906, 1554, 1672, 2937  $\text{cm}^{-1}$ ;

**$^1\text{H}$  NMR (400 MHz,  $\text{CDCl}_3$ ):**  $\delta$  8.02 (t,  $J = 8.1$  Hz, 4H), 7.69 – 7.65 (m, 2H), 7.53 (t,  $J = 7.6$  Hz, 2H), 3.30 (d,  $J = 10.3$  Hz, 2H), 3.13 (d,  $J = 10.4$  Hz, 2H), 2.49 (s, 6H).

**$^{13}\text{C}$  NMR (101 MHz,  $\text{CDCl}_3$ ):**  $\delta$  161.6, 145.9, 141.9, 129.7, 128.9, 127.8, 126.4, 126.2, 124.5, 34.2, 17.6.

**DEPT 135 (101 MHz,  $\text{CDCl}_3$ ):**  $\delta$  129.7, 128.9, 126.2, 124.5, 34.2 ( $\downarrow$ ), 17.6 ( $\uparrow$ ).

**HRMS-ESI:** Calcd. for  $\text{C}_{22}\text{H}_{18}\text{N}_2$   $[\text{M}+\text{H}]^+$   $m/z$ : 311.1548; Found 311.1554

*2,11-dibromo-13,14-dimethyl-6,7-dihydrodibenzo[b,j][4,7]phenanthroline (3b)*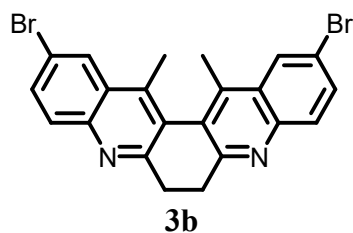

**Nature:** Green powder; **Yield:** 93 %; **Rf (40% EtOAc-Hexane):** 0.40, **M. P. :** 299-301 °C.

**FTIR(KBr)** $\nu_{\max}$ : 825, 1068, 1309, 1483  $\text{cm}^{-1}$ ;

**$^1\text{H}$  NMR (400 MHz,  $\text{CDCl}_3$ ):**  $\delta$  8.22 (d,  $J = 2.1$  Hz, 2H), 7.95 (d,  $J = 8.9$  Hz, 2H), 7.80 (dd,  $J = 8.9, 2.1$  Hz, 2H), 3.33 (d,  $J = 10.4$  Hz, 2H), 3.16 (d,  $J = 10.4$  Hz, 2H), 2.51 (s, 6H).

**$^{13}\text{C}$  NMR (101 MHz,  $\text{CDCl}_3$ ):**  $\delta$  162.0, 144.9, 140.9, 133.0, 130.8, 129.0, 127.0, 126.8, 120.2, 34.2, 17.6.

**DEPT 135 (101 MHz,  $\text{CDCl}_3$ ):**  $\delta$  133.2, 130.9, 127.1, 34.3 ( $\downarrow$ ), 17.7 ( $\uparrow$ ).

**HRMS-ESI:** Calcd. for  $\text{C}_{22}\text{H}_{16}\text{Br}_2\text{N}_2$   $[\text{M}+\text{H}]^+$   $m/z$ :



466.9758; Found 466.9750

*2,4,9,11-tetrabromo-13,14-dimethyl-6,7-dihydrodibenzo[b,j][4,7]phenanthroline (3c)*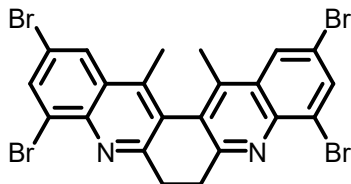**3c**

**Nature:** Brown powder; **Yield:** 90 %; **Rf (30% EtOAc-Hexane):** 0.46, **M. P. :** 299-301 °C.

**FTIR(KBr) $v_{\max}$ :** 704, 835, 1271, 1597  $\text{cm}^{-1}$ ;

**$^1\text{H}$  NMR (400 MHz,  $\text{CDCl}_3$ ):**  $\delta$  8.11 (d,  $J = 6.5$  Hz, 4H), 3.40 (d,  $J = 10.7$  Hz, 2H), 3.12 (d,  $J = 10.6$  Hz, 2H), 2.47 (s, 6H).

**$^{13}\text{C}$  NMR (101 MHz,  $\text{CDCl}_3$ ):**  $\delta$  152.7, 146.7, 140.0, 139.2, 135.1, 130.1, 129.6, 128.5, 128.4, 127.8, 127.6, 127.3, 126.5, 126.0, 123.7, 28.3, 25.5, 14.1.

**DEPT 135 (101 MHz,  $\text{CDCl}_3$ ):** 132.4, 123.2, 30.6 ( $\downarrow$ ), 14.1 ( $\uparrow$ ).

**HRMS-ESI:** Calcd. for  $\text{C}_{22}\text{H}_{14}\text{Br}_4\text{N}_2$  [ $\text{M}+\text{H}$ ] +  $m/z$ : 622.7968; Found: 622.7952

*2,11-dichloro-13,14-diphenyl-6,7-dihydrodibenzo[b,j][4,7]phenanthroline (3d)*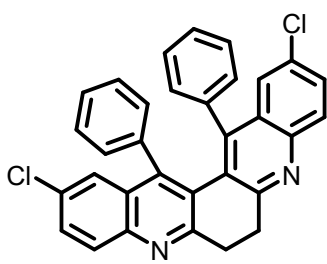**3d**

**Nature:** Brown powder; **Yield:** 88%; **Rf (30% EtOAc-Hexane):** 0.50, **M. P. :** 250-252 °C.

**FTIR(KBr) $v_{\max}$ :** 702, 827, 1020, 1076, 1157, 1477  $\text{cm}^{-1}$ ;

**$^1\text{H}$  NMR (400 MHz,  $\text{CDCl}_3$ ):**  $\delta$  7.93 (d,  $J = 8.9$  Hz, 2H), 7.58 (d,  $J = 2.2$  Hz, 2H), 7.51 (dd,  $J = 8.9, 2.3$  Hz, 2H), 7.21 – 6.84 (m, 6H), 6.60 – 6.09 (m, 4H), 3.36 (d,  $J = 10.4$  Hz, 2H), 3.22 (d,  $J = 10.6$  Hz, 2H).

**$^{13}\text{C}$  NMR (101 MHz,  $\text{CDCl}_3$ ):**  $\delta$  162.7, 145.8, 145.7, 134.9, 132.0, 130.5, 128.7, 128.1, 126.8, 125.6, 125.0, 34.9.

**DEPT 135 (101 MHz,  $\text{CDCl}_3$ ):**  $\delta$  130.5, 128.7, 128.1, 125.0, 34.9 ( $\downarrow$ ).

**HRMS-ESI:** Calcd. for  $C_{32}H_{20}Cl_2N_2$   $[M+H]^+$  + m/z:  
503.1078; Found 503.1041

*13,14-dimethyl-2,11-diphenyl-6,7-dihydrodibenzo  
[b,j][4,7]phenanthroline (6a)*

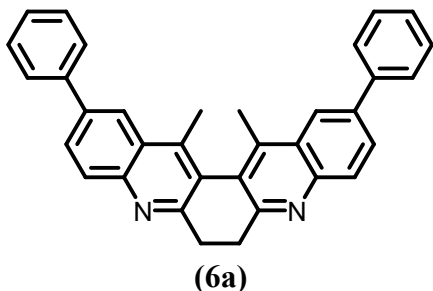

**Nature:** Yellow powder; **Yield:** 92%; **Rf (40%  
EtOAc-Hexane):** 0.46, **M. P. :** 269-271 °C.

**FTIR(KBr) $v_{max}$ :** 700, 758, 839, 1487, 3280  $cm^{-1}$ ;

**$^1H$  NMR (400 MHz,  $CDCl_3$ ):**  $\delta$  8.17 (d,  $J$  = 1.8 Hz, 2H), 8.09 (d,  $J$  = 8.6 Hz, 2H), 7.93 (dd,  $J$  = 8.6, 2.0 Hz, 2H), 7.70 – 7.67 (m, 4H), 7.45 (t,  $J$  = 7.6 Hz, 4H), 7.35 (t,  $J$  = 7.4 Hz, 2H), 3.31 (d,  $J$  = 10.3 Hz, 2H), 3.16 (d,  $J$  = 10.4 Hz, 2H), 2.55 (s, 6H).

**$^{13}C$  NMR (101 MHz,  $CDCl_3$ ):**  $\delta$  161.7, 145.5, 141.8, 141.0, 139.1, 129.5, 129.3, 129.1, 127.9, 127.8, 127.6, 126.8, 122.6, 34.4, 17.7.

**DEPT 135 (101 MHz,  $CDCl_3$ ):** 129.5, 129.3, 129.1, 127.8, 127.6, 122.6, 34.4 ( $\downarrow$ ), 17.7 ( $\uparrow$ ).

**HRMS-ESI:** Calcd. for  $C_{34}H_{26}N_2$   $[M+H]^+$  + m/z:  
463.2174; Found 463.2177

*13,14-dimethyl-2,11-di(naphthalen-1-yl)-6,7-  
dihydrodibenzo [b,j][4,7]phenanthroline (6b)*

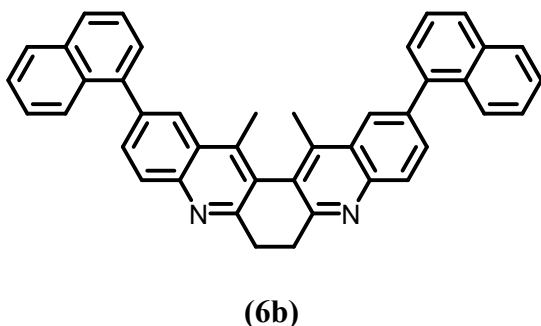

**Nature:** Yellow powder; **Yield:** 87%; **Rf (40%  
EtOAc-Hexane):** 0.47, **M. P. :** 270-272 °C.

**FTIR(KBr) $v_{max}$ :** 755, 1585, 2922  $cm^{-1}$ ;

**$^1H$  NMR (400 MHz,  $CDCl_3$ ):**  $\delta$  8.13 (d,  $J$  = 8.5 Hz, 2H), 8.09 (s, 2H), 7.86 – 7.79 (m, 8H), 7.51 – 7.34 (m, 8H), 3.37 (d,  $J$  = 10.2 Hz, 2H), 3.20 (d,  $J$  = 10.2 Hz, 2H), 2.49 (s, 6H).

**$^{13}C$  NMR (101 MHz,  $CDCl_3$ ):**  $\delta$  161.8, 145.4, 141.9, 139.9, 138.8, 133.9, 132.1, 131.8, 128.6, 128.5, 128.2, 127.8, 127.4, 126.8, 126.4, 126.0, 125.9, 125.5, 34.3,

17.7.

**DEPT 135 (101 MHz, CDCl<sub>3</sub>):** 132.1, 128.6, 128.5, 128.2, 127.4, 126.4, 126.0, 125.9, 125.5, 34.3 (↓), 17.7 (↑).

**HRMS-ESI:** Calcd. for C<sub>42</sub>H<sub>30</sub>N<sub>2</sub> [M+H]<sup>+</sup> + m/z: 563.2487; Found 563.2482

*4,4'-(13,14-dimethyl-6,7-dihydrodibenzo[b,j][4,7]phenanthroline-2,11-diyl)dibenzonitrile (6c)*

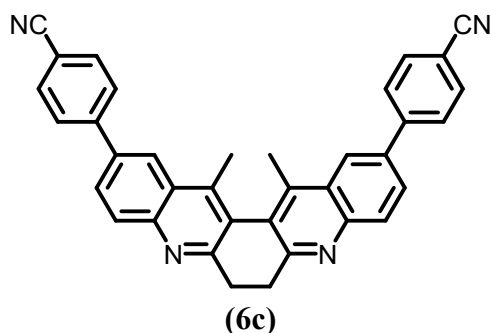

**Nature:** Yellow powder; **Yield:** 90%; **Rf (40% EtOAc-Hexane):** 0.47, **M. P. :** 225-226 °C.

**FTIR(KBr)v<sub>max</sub>:** 821, 1020, 1209, 1514, 1602, 2223, 2922, 3305 cm<sup>-1</sup>;

**<sup>1</sup>H NMR (400 MHz, CDCl<sub>3</sub>):** δ 8.25 (d, J = 1.8 Hz, 2H), 8.22 (d, J = 8.6 Hz, 2H), 8.04 – 7.97 (m, 4H), 7.94 (d, J = 7.3 Hz, 2H), 7.73 – 7.60 (m, 4H), 3.43 (d, J = 10.4 Hz, 2H), 3.25 (d, J = 10.3 Hz, 2H), 2.66 (s, 6H).

**<sup>13</sup>C NMR (101 MHz, CDCl<sub>3</sub>):** δ 162.1, 142.2, 141.7, 137.7, 131.7, 131.4, 131.0, 129.8, 129.6, 129.1, 127.9, 126.9, 124.5, 124.5, 124.4, 124.4, 122.9, 34.2, 17.8.

**DEPT 135 (101 MHz, CDCl<sub>3</sub>):** 130.2, 130.2, 129.6, 128.9, 127.6, 127.6, 125.7, 122.6, 34.2 (↓), 17.6 (↑).

**HRMS-ESI:** Calcd. for C<sub>36</sub>H<sub>24</sub>N<sub>4</sub> [M+H]<sup>+</sup> + m/z: 513.2079; Found 513.2074

*2,11-bis(3-chlorophenyl)-13,14-dimethyl-6,7-dihydrodibenzo [b,j][4,7]phenanthroline (6d)*

**Nature:** Yellow powder; **Yield:** 93%; **Rf (40% EtOAc-Hexane):** 0.44, **M. P. :** 158-160 °C.

**FTIR(KBr)v<sub>max</sub>:** 779, 837, 1473, 1566, 2962 cm<sup>-1</sup>;

**<sup>1</sup>H NMR (400 MHz, CDCl<sub>3</sub>):** δ 8.11 (d, J = 1.7 Hz, 2H), 8.05 (d, J = 8.6 Hz, 2H), 7.83 (dd, J = 8.7, 1.8 Hz,

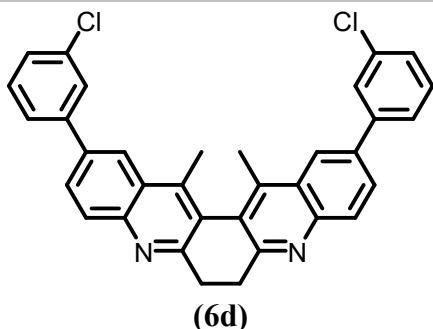

$^1\text{H NMR}$  (400 MHz,  $\text{CDCl}_3$ ):  $\delta$  7.62 (s, 2H), 7.51 (d,  $J = 7.6$  Hz, 2H), 7.34 – 7.25 (m, 2H), 3.28 (d,  $J = 10.3$  Hz, 2H), 3.12 (d,  $J = 10.4$  Hz, 2H), 2.52 (s, 6H).

$^{13}\text{C NMR}$  (101 MHz,  $\text{CDCl}_3$ ):  $\delta$  162.1, 145.8, 142.8, 141.9, 137.6, 135.0, 130.3, 129.7, 129.0, 127.9, 127.8, 127.7, 126.9, 125.8, 122.8, 34.3, 17.7.

**DEPT 135** (101 MHz,  $\text{CDCl}_3$ ): 130.3, 129.7, 129.0, 127.8, 127.7, 125.8, 122.8, 34.3 ( $\downarrow$ ), 17.75 ( $\uparrow$ ).

**HRMS-ESI**: Calcd. for  $\text{C}_{34}\text{H}_{24}\text{Cl}_2\text{N}_2$   $[\text{M}+\text{H}]^+$   $m/z$ : 531.1395; Found: 531.1374

*2,11-bis(3,5-dichlorophenyl)-13,14-dimethyl-6,7-dihydrodibenzo [b,j][4,7]phenanthroline (6e)*

**Nature**: Yellow powder; **Yield**: 90%; **Rf** (40% EtOAc-Hexane): 0.42, **M. P.**: 248-250  $^\circ\text{C}$ .

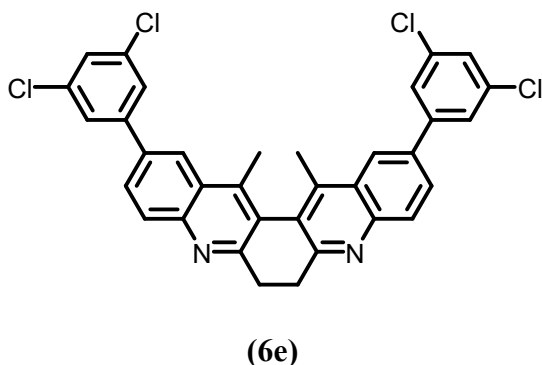

**FTIR(KBr)** $\nu_{\text{max}}$ : 734, 804, 1446, 1523, 1597  $\text{cm}^{-1}$ ;

$^1\text{H NMR}$  (400 MHz,  $\text{CDCl}_3$ ):  $\delta$  8.13 – 8.10 (m, 4H), 7.86 (dd,  $J = 8.7, 1.9$  Hz, 2H), 7.55 (t,  $J = 2.1$  Hz, 4H), 7.34 (t,  $J = 1.7$  Hz, 2H), 3.34 (d,  $J = 10.4$  Hz, 2H), 3.21 – 3.14 (m, 2H), 2.57 (s, 6H).

$^{13}\text{C NMR}$  (101 MHz,  $\text{CDCl}_3$ ):  $\delta$  152.7, 146.7, 140.0, 139.2, 135.1, 130.1, 129.6, 128.5, 128.4, 127.8, 127.6, 127.3, 126.5, 126.0, 123.7, 28.3, 14.1.

**DEPT 135** (101 MHz,  $\text{CDCl}_3$ ): 126.2, 125.1, 124.0, 122.4, 122.2, 120.9, 119.3, 30.5 ( $\downarrow$ ), 14.1 ( $\uparrow$ ).

**HRMS-ESI**: Calcd. for  $\text{C}_{34}\text{H}_{22}\text{Cl}_4\text{N}_2$   $[\text{M}+\text{H}]^+$   $m/z$ : 599.0615; Found: 599.0614

*13,14-dimethyl-2,11-bis(3-nitrophenyl)-6,7-dihydrodibenzo [b,j][4,7]phenanthroline (6f)*

**Nature**: Yellow powder; **Yield**: 88%; **Rf** (40% EtOAc-Hexane): 0.47, **M. P.**: 179-181  $^\circ\text{C}$ .

**FTIR(KBr)** $\nu_{\text{max}}$ : 686, 754, 1205, 1413, 1597  $\text{cm}^{-1}$ ;

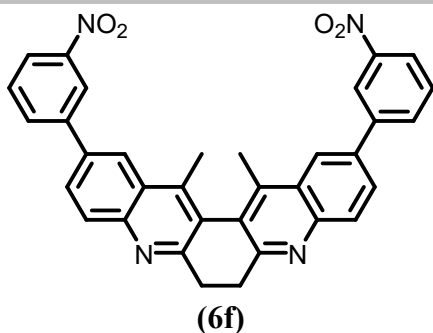

**<sup>1</sup>H NMR (400 MHz, CDCl<sub>3</sub>):** δ 8.20 (s, 2H), 8.15 (d, J = 8.6 Hz, 2H), 7.93 (d, J = 8.7 Hz, 2H), 7.72 (s, 2H), 7.61 (d, J = 7.6 Hz, 2H), 7.42 (t, J = 7.8 Hz, 2H), 7.36 (d, J = 8.0 Hz, 2H), 3.38 (d, J = 10.3 Hz, 2H), 3.22 (d, J = 10.3 Hz, 2H), 2.62 (s, 6H).

**<sup>13</sup>C NMR (101 MHz, CDCl<sub>3</sub>):** δ 161.9, 145.6, 142.7, 141.9, 137.5, 134.9, 130.2, 129.6, 128.9, 127.8, 127.7, 127.6, 126.8, 125.7, 122.7, 34.2, 17.6.

**DEPT 135 (101 MHz, CDCl<sub>3</sub>):** 130.3, 129.7, 129.0, 127.8, 127.7, 125.8, 122.7, 34.3 (↓), 17.7 (↑).

**HRMS-ESI:** Calcd. for C<sub>34</sub>H<sub>24</sub>N<sub>4</sub>O<sub>4</sub> [M+H]<sup>+</sup> + m/z: 553.1876; Found: 533.1887

*13,14-dimethyl-2,4,9,11-tetra(phenyl)-6,7-dihydrodibenzo[b,j][4,7]phenanthroline (6g)*

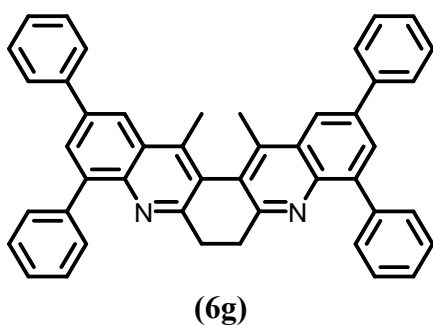

**Nature:** White powder; **Yield:** 90%; **Rf (40% EtOAc-Hexane):** 0.45, **M. P. :** 182-184 °C.

**FTIR(KBr)v<sub>max</sub>:** 736, 829, 1220, 1471, 1589 cm<sup>-1</sup>;

**<sup>1</sup>H NMR (400 MHz, CDCl<sub>3</sub>):** δ 8.21 (s, 2H), 7.99 (s, 2H), 7.75- 7.72 (m, 8H), 7.47 (t, J = 7.5 Hz, 8H), 7.39 (t, J = 7.5 Hz, 4H), 3.33- 3.03 (m, 4H), 2.63 (s, 6H).

**<sup>13</sup>C NMR (101 MHz, CDCl<sub>3</sub>):** δ 148.1, 142.9, 127.4, 126.9, 120.3, 115.0, 112.3, 31.7, 21.4.

**DEPT 135 (101 MHz, CDCl<sub>3</sub>):** 142.7, 127.3, 126.8, 114.9, 31.0(↑), 21.4 (↓).

**HRMS-ESI:** Calcd. for C<sub>46</sub>H<sub>34</sub>N<sub>2</sub> [M+H]<sup>+</sup> + m/z: 615.2800; Found: 615.2809

*2,11-di([1,1'-biphenyl]-2-yl)-13,14-dimethyl-6,7-dihydrodibenzo [b,j][4,7]phenanthroline (6h)*

**Nature:** Yellow powder; **Yield:** 89%; **Rf (40% EtOAc-Hexane):** 0.46, **M. P. :** 184-186 °C.

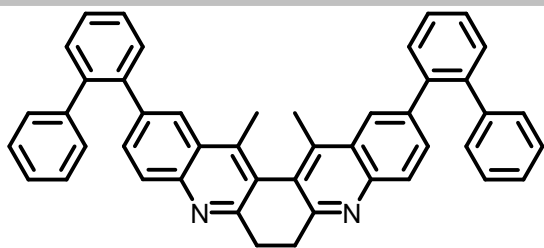

(6h)

**FTIR(KBr)** $v_{\max}$ : 549, 815, 1118, 1303, 1440, 1552  $\text{cm}^{-1}$ ;

**$^1\text{H}$  NMR (400 MHz, DMSO- $d_6$ )**:  $\delta$  8.43 (s, 2H), 8.06 (s, 2H), 7.98 (d,  $J = 7.8$  Hz, 4H), 7.81 (d,  $J = 7.7$  Hz, 4H), 7.60 – 7.49 (m, 8H), 7.44 (m, 4H), 3.12 – 3.00 (m, 4H), 2.70 (s, 6H).

**$^{13}\text{C}$  NMR (101 MHz, DMSO- $d_6$ )**:  $\delta$  160.8, 158.9, 146.1, 144.9, 144.9, 136.0, 132.8, 130.8, 130.7, 129.3, 129.1, 126.4, 119.0, 116.5, 114.7, 107.3, 34.6, 16.2.

**DEPT 135 (101 MHz, DMSO- $d_6$ )**: 136.0, 132.8, 130.7, 129.3, 126.4, 116.5, 34.6 ( $\downarrow$ ), 16.2 ( $\uparrow$ ).

**HRMS-ESI**: Calcd. for  $\text{C}_{46}\text{H}_{34}\text{N}_2$  [ $\text{M}+\text{H}$ ] +  $m/z$ : 615.2800; Found: 615.2806

*13,14-dimethyl-2,11-bis(4-(trifluoromethyl)phenyl)-6,7-dihydrodibenzo[b,j][4,7]phenanthroline (6i)*

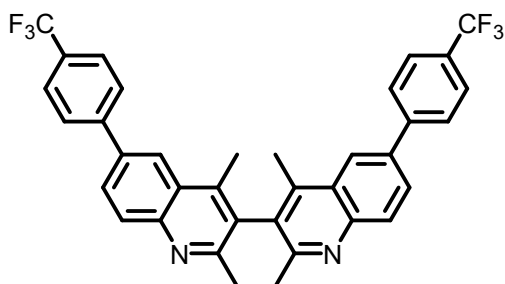

(6g)

**Nature**: Yellow powder; **Yield**: 90%; **Rf (40% EtOAc-Hexane)**: 0.45, **M. P.**: 182-184  $^{\circ}\text{C}$ .

**FTIR(KBr)** $v_{\max}$ : 754, 896, 1126, 1207, 1413, 1596  $\text{cm}^{-1}$ ;

**$^1\text{H}$  NMR (400 MHz,  $\text{CDCl}_3$ )**:  $\delta$  8.18 (d,  $J = 6.8$  Hz, 4H), 7.94 (d,  $J = 11.3$  Hz, 4H), 7.87 (d,  $J = 7.2$  Hz, 2H), 7.60 (q,  $J = 7.7$  Hz, 4H), 3.40 (d,  $J = 10.2$  Hz, 2H), 3.18 (d,  $J = 9.8$  Hz, 2H), 2.60 (s, 6H).

**$^{13}\text{C}$  NMR (101 MHz,  $\text{CDCl}_3$ )**:  $\delta$  161.9, 142.6, 141.7, 137.9, 131.7, 131.4, 131.4, 129.6, 129.6, 129.3, 127.9, 126.8, 125.6, 124.5, 124.4, 124.4, 122.9, 33.9, 17.8.

**DEPT 135 (101 MHz,  $\text{CDCl}_3$ )**: 130.9, 129.6, 129.3, 124.5, 124.4, 124.3, 122.9, 33.9 ( $\downarrow$ ), 17.8 ( $\uparrow$ ).

**HRMS-ESI**: Calcd. for  $\text{C}_{36}\text{H}_{24}\text{F}_6\text{N}_2$  [ $\text{M}+\text{H}$ ] +  $m/z$ : 599.1922; Found: 599.1924

*13,14-dimethyl-2,11-di(phenanthren-9-yl)-6,7-dihydrodibenzo[b,j][4,7]phenanthroline (6j)*

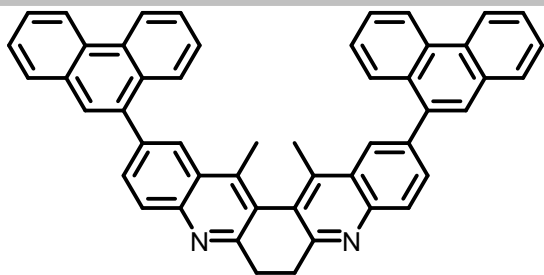

(6h)

**Nature:** White powder; **Yield:** 88%; **Rf (40% EtOAc-Hexane):** 0.47, **M. P.:** 275-277 °C.

**FTIR(KBr) $\nu_{\max}$ :** 729, 958, 1097, 1226, 1460, 1593  $\text{cm}^{-1}$ ;

**$^1\text{H}$  NMR (400 MHz,  $\text{CDCl}_3$ ):**  $\delta$  8.74 (d,  $J = 8.1$  Hz, 2H), 8.68 (d,  $J = 8.0$  Hz, 2H), 8.16 (s, 4H), 7.86 (d,  $J = 8.0$  Hz, 6H), 7.74 (s, 2H), 7.60 (m, 6H), 7.48 (t,  $J = 7.3$  Hz, 2H), 3.41 (d,  $J = 10.2$  Hz, 2H), 3.23 (d,  $J = 10.1$  Hz, 2H), 2.53 (s, 6H).

**$^{13}\text{C}$  NMR (101 MHz,  $\text{CDCl}_3$ ):**  $\delta$  161.9, 145.4, 142.1, 138.9, 138.4, 132.1, 131.5, 131.2, 130.8, 130.2, 128.8, 128.7, 128.2, 127.9, 127.1, 127.0, 126.9, 126.8, 126.8, 125.5, 123.2, 122.7, 34.4, 17.8.

**DEPT 135 (101 MHz,  $\text{CDCl}_3$ ):** 130.2, 126.0, 128.5, 126.6, 126.2, 124.6, 33.8 ( $\downarrow$ ), 17.8 ( $\uparrow$ ).

**HRMS-ESI:** Calcd. for  $\text{C}_{50}\text{H}_{34}\text{N}_2$  [ $\text{M}+\text{H}$ ] +  $m/z$ : 663.2800; Found: 663.2836

*13,14-dimethyl-2,11-di(pyren-4-yl)-6,7-dihydrodibenzo[b,j][4,7]phenanthroline (6k)*

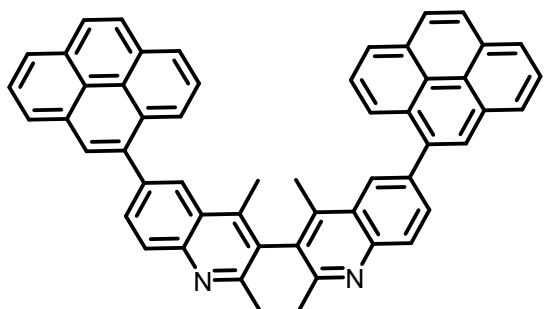

(6k)

**Nature:** Yellow powder; **Yield:** 82%; **Rf (40% EtOAc-Hexane):** 0.49, **M. P.:** 280-282 °C.

**FTIR(KBr) $\nu_{\max}$ :** 718, 835, 970, 1175, 1584, 2847, 2919, 3039  $\text{cm}^{-1}$ ;

**$^1\text{H}$  NMR (400 MHz,  $\text{CDCl}_3$ ):**  $\delta$  8.32 (d,  $J = 8.0$  Hz, 2H), 8.26 (s, 2H), 8.23 (dd,  $J = 7.8, 3.6$  Hz, 2H), 8.18 (s, 1H), 8.16 (s, 1H), 8.15 (s, 1H), 8.13 (d,  $J = 5.7$  Hz, 3H), 8.08 (d,  $J = 3.7$  Hz, 4H), 8.05 (s, 1H), 8.02 (d,  $J = 4.7$  Hz, 3H), 8.00 (s, 1H), 8.00 – 7.94 (m, 3H), 3.54 (s, 2H), 3.28 (d,  $J = 10.5$  Hz, 2H), 2.60 (s, 6H).

**$^{13}\text{C}$  NMR (101 MHz,  $\text{CDCl}_3$ ):**  $\delta$  141.4, 139.8, 132.8, 127.1, 125.6, 123.0, 122.8, 120.5, 120.4, 118.7, 108.5, 42.1, 29.2.

**DEPT 135 (101 MHz,  $\text{CDCl}_3$ ):** 127.01, 125.5, 120.4, 120.3, 118.6, 108.3, 41.9 ( $\downarrow$ ), 29.1 ( $\uparrow$ ).

**HRMS-ESI:** Calcd. for  $C_{54}H_{34}N_2$   $[M+H]^+ m/z$ :  
711.2800; Found: 711.2809

*N2,N11-bis(2,3-dimethylphenyl)-13,14-dimethyl-6,7-dihydrodibenzo[b,j][4,7]phenanthroline-2,11-diamine*  
(8)

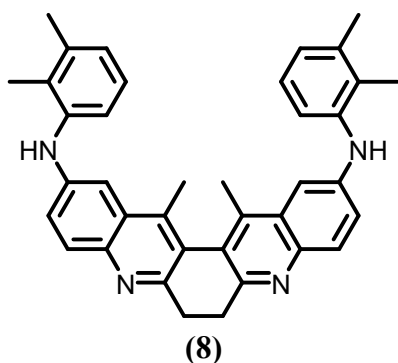

**Nature:** Red powder; **Yield:** 89%; **Rf (50% EtOAc-Hexane):** 0.50, **M. P. :** 193-195 °C.

**FTIR(KBr) $v_{max}$ :** 794, 1004, 1095, 1201, 1463, 1593, 2926, 3275  $cm^{-1}$ ;

**$^1H$  NMR (400 MHz,  $CDCl_3$ ):**  $\delta$  7.86 (d,  $J = 8.9$  Hz, 1H), 7.25 (d,  $J = 9.0$  Hz, 1H), 7.20 (s, 1H), 7.15 (d,  $J = 7.9$  Hz, 1H), 7.04 (t,  $J = 7.7$  Hz, 1H), 6.91 (d,  $J = 7.4$  Hz, 1H), 5.63 (s, 1H), 3.18 (d,  $J = 10.1$  Hz, 1H), 3.05 (d,  $J = 10.1$  Hz, 1H), 2.29 (d,  $J = 2.2$  Hz, 6H), 2.16 (s, 3H).

**$^{13}C$  NMR (101 MHz,  $CDCl_3$ ):**  $\delta$  158.6, 143.0, 141.5, 140.4, 139.7, 138.3, 130.0, 129.3, 129.0, 126.9, 126.3, 125.5, 121.9, 119.4, 106.7, 34.2, 20.8, 17.6, 14.0.

**DEPT 135 (101 MHz,  $CDCl_3$ ):** 130.0, 126.3, 125.5, 121.9, 119.4, 106.7, 34.2 ( $\downarrow$ ), 20.8 ( $\uparrow$ ), 17.6 ( $\uparrow$ ), 14.0 ( $\uparrow$ ).

**HRMS-ESI:** Calcd. for  $C_{38}H_{36}N_4$   $[M+H]^+ m/z$ :  
549.3018; Found: 548.2929

*13,14-bis(bromomethyl)-6,7-dihydrodibenzo[b,j][4,7]phenanthroline*  
(9a)

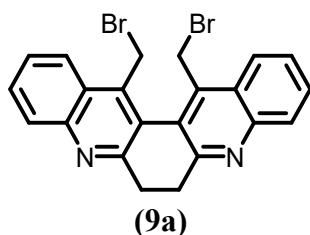

**Nature:** Red powder; **Yield:** 68%; **Rf (40% EtOAc-Hexane):** 0.42, **M. P. :** 359-361 °C.

**FTIR(KBr) $v_{max}$ :** 549, 815, 1120, 1303, 1440, 1552  $cm^{-1}$ ;



**<sup>1</sup>H NMR (400 MHz, CDCl<sub>3</sub>):** δ 8.18 (d, *J* = 8.3 Hz, 2H), 8.09 (d, *J* = 8.3 Hz, 2H), 7.80 – 7.70 (m, 2H), 7.67 – 7.59 (m, 2H), 4.92 (d, *J* = 10.7 Hz, 2H), 4.69 (d, *J* = 10.6 Hz, 2H), 3.34 (d, *J* = 10.5 Hz, 2H), 3.19 – 3.09 (m, 2H).

**<sup>13</sup>C NMR (101 MHz, CDCl<sub>3</sub>):** δ 161.5, 147.1, 139.5, 130.7, 129.4, 126.9, 125.5, 124.8, 124.0, 34.0, 25.8.

**DEPT 135 (101 MHz, CDCl<sub>3</sub>):** 131.0, 129.3, 127.5, 124.9, 33.9 (↓), 25.8 (↓).

**HRMS-ESI:** Calcd. for C<sub>22</sub>H<sub>16</sub>Br<sub>2</sub>N<sub>2</sub> [M+H]<sup>+</sup> + *m/z*: 466.9758; Found: 466.9757

*13-(bromomethyl)-14-methyl-6,7-dihydrodibenzo[b,j][4,7]phenanthroline (9b)*

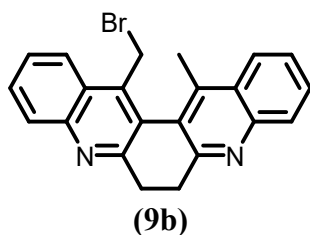

**Nature:** Brown powder; **Yield:** 24%; **R<sub>f</sub> (40% EtOAc-Hexane):** 0.46, **M. P. :** 355-356 °C.

**FTIR(KBr)v<sub>max</sub>:** 736, 829, 1006, 1074, 1222, 1388, 1471, 1589 cm<sup>-1</sup>;

**<sup>1</sup>H NMR (400 MHz, CDCl<sub>3</sub>):** δ 8.17 (d, *J* = 8.3 Hz, 1H), 8.12 (d, *J* = 8.3 Hz, 1H), 8.10 – 8.03 (m, 1H), 8.00 (dd, *J* = 8.4, 0.7 Hz, 1H), 7.72 (m, 2H), 7.66 – 7.53 (m, 2H), 5.00 (d, *J* = 10.6 Hz, 1H), 4.63 (t, *J* = 6.9 Hz, 1H), 3.49 – 3.27 (m, 2H), 3.15 (m, 2H), 2.52 (s, 3H).

**<sup>13</sup>C NMR (101 MHz, CDCl<sub>3</sub>):** δ 161.4, 161.4, 147.0, 139.6, 130.5, 130.2, 129.3, 128.7, 127.6, 126.8, 126.6, 125.6, 125.4, 124.8, 124.6, 33.8, 26.1, 17.3.

**DEPT 135 (101 MHz, CDCl<sub>3</sub>):** 130.5, 130.2, 129.3, 128.7, 126.8, 126.6, 124.8, 124.6, 33.8(↓), 26.1(↓), 17.3 (↑).

**HRMS-ESI:** Calcd. for C<sub>22</sub>H<sub>17</sub>BrN<sub>2</sub> [M+H]<sup>+</sup> + *m/z*: 389.0653; Found: 389.0666

## References

1. H. Xiong, X. Wu, H. Wang, S. Sun, J.-T. Yu and J. Cheng, *Adv. Synth. Catal.*, 2019, **361**, 3538–3542.

- 
2. M. M. Maluleka, and M. J. Mphahlele, *Tetrahedron*, 2013, **69**, 699-704

**Absorption and emission spectra of compounds 3a, 6a, 6d, 6f, 8**

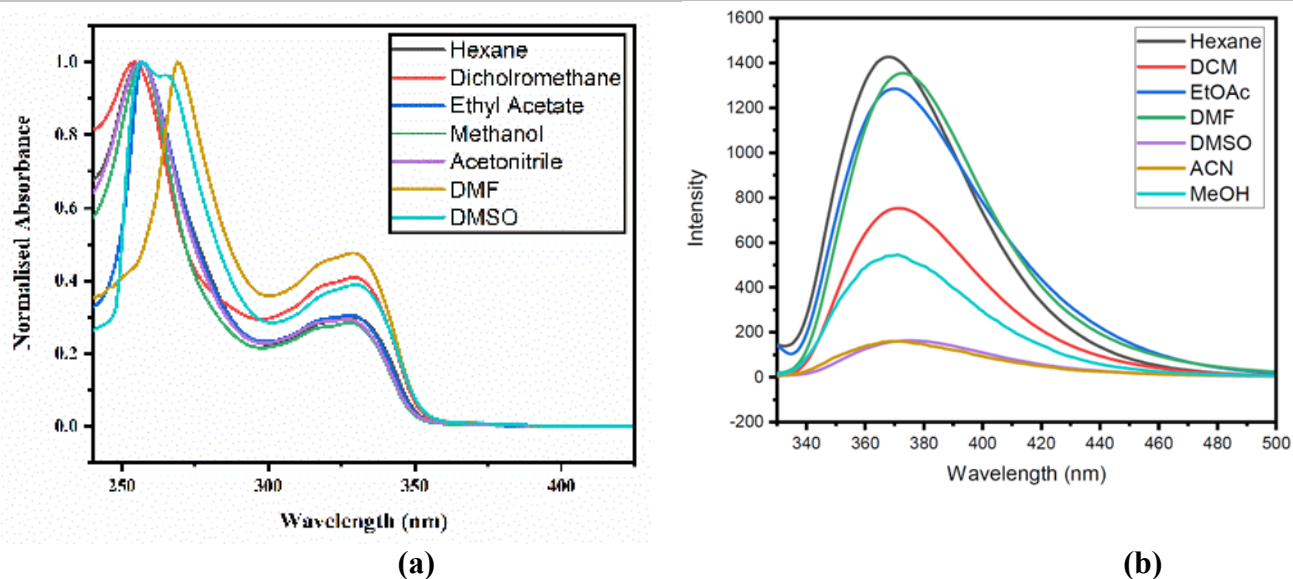

SI Figure :1

(a) Normalised absorption spectra of compound **3a** recorded at  $C \times 10^{-5}$  M at 298 K(b) Normalised emission spectra of compound **3a** recorded at  $C \times 10^{-5}$  M at 298 KSI Table :1 : Photophysical properties of compound **3a**

| Entry | Solvent                         | Absorption <sup>a</sup><br>$\lambda_{\max, \text{abs}}$<br>(nm) | Emission <sup>a</sup><br>$\lambda_{\max, \text{emi}}$<br>(nm) | Molar<br>Extinction<br>Coefficient<br>$\times 10^4$<br>( $\epsilon$ ) $\pi$ - $\pi^*$ | Stoke's<br>shift<br>$\Delta \bar{\nu}$<br>$\times 10^4$<br>( $\text{cm}^{-1}$ ) <sup>b</sup> | Quantum<br>yield ( $\Phi_f$ ) <sup>c</sup> |
|-------|---------------------------------|-----------------------------------------------------------------|---------------------------------------------------------------|---------------------------------------------------------------------------------------|----------------------------------------------------------------------------------------------|--------------------------------------------|
| 1.    | Hexane                          | 256, 329                                                        | 369                                                           | 5.8975                                                                                | 1.1962                                                                                       | 0.4056                                     |
| 2.    | CH <sub>2</sub> Cl <sub>2</sub> | 254, 329                                                        | 372                                                           | 3.0875                                                                                | 1.2488                                                                                       | 0.5997                                     |
| 3.    | EtOAc                           | 257, 328                                                        | 370                                                           | 4.1235                                                                                | 1.1883                                                                                       | 0.5624                                     |
| 4.    | Methanol                        | 257, 327                                                        | 369                                                           | 4.5657                                                                                | 1.1810                                                                                       | 0.1837                                     |
| 5.    | CH <sub>3</sub> CN              | 256, 327                                                        | 371                                                           | 4.3265                                                                                | 1.2108                                                                                       | 0.5367                                     |
| 6.    | DMF                             | 269, 329                                                        | 373                                                           | 1.3024                                                                                | 1.0365                                                                                       | 0.8953                                     |
| 7.    | DMSO                            | 257, 330                                                        | 377                                                           | 3.3570                                                                                | 1.2385                                                                                       | 0.4641                                     |

<sup>a</sup>Recorded at 298 K.<sup>b</sup>Stoke's shift =  $\lambda_{\max, \text{abs}} - \lambda_{\max, \text{emi}}$  [ $\text{cm}^{-1}$ ].<sup>c</sup>Determined with anthracene as a standard  $\Phi_f = 0.27$  at excitation wavelength 246 nm.

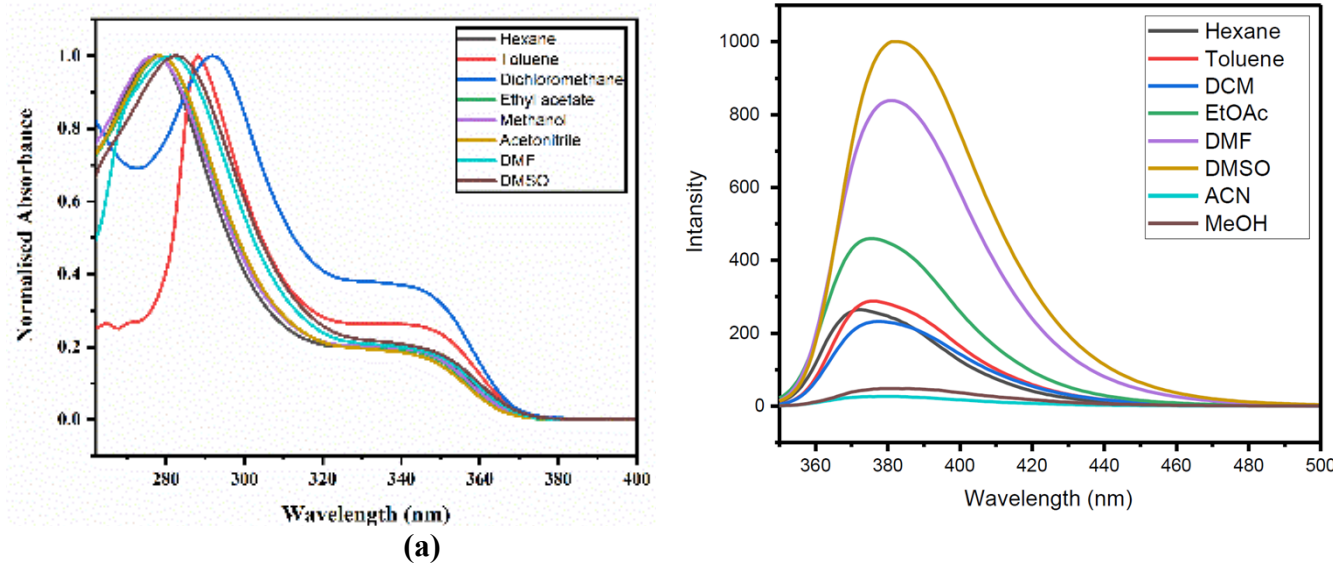

(b)

**SI Figure:2**

(a) Normalised absorption spectra of compound **6a** recorded at  $C 2 \times 10^{-5} M$  at 298 K

(b) Normalised emission spectra of compound **6a** recorded at  $C 2 \times 10^{-5} M$  at 298 K

**SI Table :2** : Photophysical properties of compound **6a**

## SUPPORTING INFORMATION

| Entry | Solvent                         | Absorption <sup>a</sup><br>$\lambda_{\max, \text{abs}}$<br>(nm) | Emission <sup>a</sup><br>$\lambda_{\max, \text{emi}}$<br>(nm) | Molar<br>Extinction<br>Coefficient<br>$\times 10^4$<br>( $\epsilon$ ) $\pi$ - $\pi^*$ | Stoke's<br>shift<br>$\Delta \bar{\nu}$<br>$\times 10^4$<br>( $\text{cm}^{-1}$ ) <sup>b</sup> | Quantum<br>yield ( $\Phi_f$ ) <sup>c</sup> |
|-------|---------------------------------|-----------------------------------------------------------------|---------------------------------------------------------------|---------------------------------------------------------------------------------------|----------------------------------------------------------------------------------------------|--------------------------------------------|
| 1.    | Hexane                          | 277                                                             | 372                                                           | 8.4675                                                                                | 0.9219                                                                                       | 0.3641                                     |
| 2.    | Toluene                         | 288                                                             | 376                                                           | 4.5805                                                                                | 0.8126                                                                                       | 0.8974                                     |
| 3.    | CH <sub>2</sub> Cl <sub>2</sub> | 292                                                             | 376                                                           | 3.2260                                                                                | 0.7650                                                                                       | 0.5122                                     |
| 4.    | EtOAc                           | 279                                                             | 376                                                           | 8.6865                                                                                | 0.9246                                                                                       | 0.6615                                     |
| 5.    | Methanol                        | 277                                                             | 380                                                           | 5.0952                                                                                | 0.9785                                                                                       | 0.1213                                     |
| 6.    | CH <sub>3</sub> CN              | 278                                                             | 381                                                           | 5.7700                                                                                | 0.9724                                                                                       | 0.0598                                     |
| 7.    | DMF                             | 281                                                             | 381                                                           | 3.7900                                                                                | 0.9340                                                                                       | 0.7915                                     |
| 8.    | DMSO                            | 283                                                             | 383                                                           | 5.2665                                                                                | 0.9226                                                                                       | 0.7407                                     |

<sup>a</sup>Recorded at 298 K.

<sup>b</sup>Stoke's shift =  $\lambda_{\max, \text{abs}} - \lambda_{\max, \text{emi}}$  [ $\text{cm}^{-1}$ ].

<sup>c</sup>Determined with anthracene as a standard  $\Phi_f = 0.27$  at excitation wavelength 246 nm.

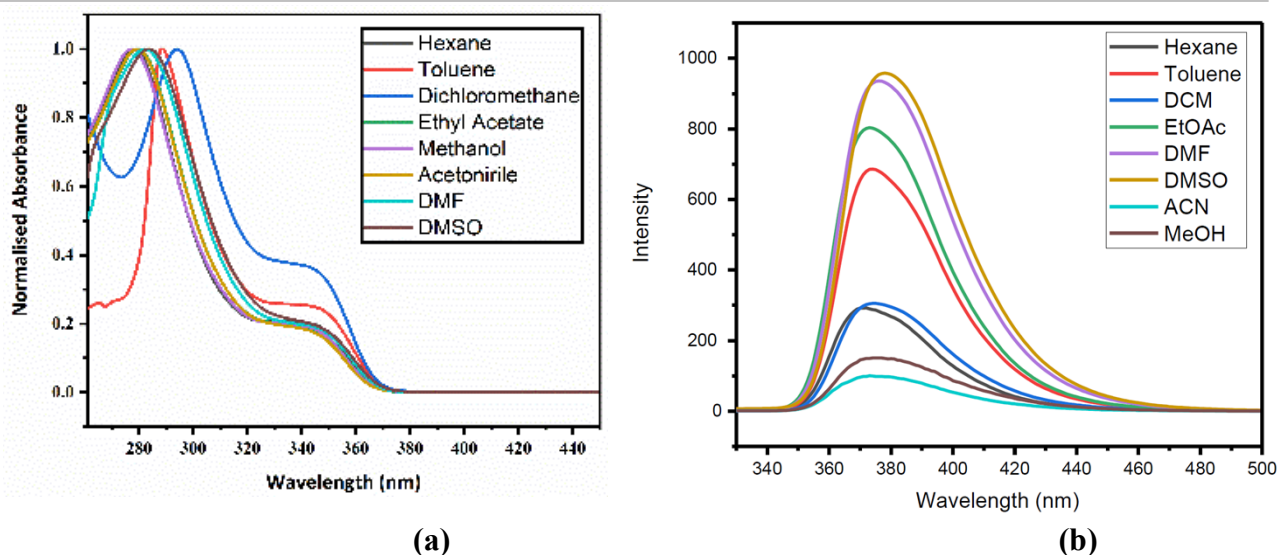

SI Figure :3

(a) Normalised absorption spectra of compound **6d** recorded at C 2x10<sup>-5</sup> M at 298 K(b) Normalised emission spectra of compound **6d** recorded at C 2x10<sup>-5</sup> M at 298 KSI Table :3 : Photophysical properties of compound **6d**

| Entry | Solvent                         | Absorption <sup>a</sup><br>$\lambda_{\max, \text{abs}}$<br>(nm) | Emission <sup>a</sup><br>$\lambda_{\max, \text{emi}}$<br>(nm) | Molar<br>Extinction<br>Coefficient<br>$\times 10^4$<br>( $\epsilon$ ) $\pi$ - $\pi^*$ | Stoke's<br>shift<br>$\Delta \bar{\nu}$<br>$\times 10^4$<br>( $\text{cm}^{-1}$ ) <sup>b</sup> | Quantum<br>yield ( $\Phi_f$ ) <sup>c</sup> |
|-------|---------------------------------|-----------------------------------------------------------------|---------------------------------------------------------------|---------------------------------------------------------------------------------------|----------------------------------------------------------------------------------------------|--------------------------------------------|
| 1.    | Hexane                          | 278                                                             | 372                                                           | 7.4475                                                                                | 0.9089                                                                                       | 0.4578                                     |
| 2.    | Toluene                         | 289                                                             | 374                                                           | 5.2830                                                                                | 0.7864                                                                                       | 0.9049                                     |
| 3.    | CH <sub>2</sub> Cl <sub>2</sub> | 294                                                             | 374                                                           | 3.7135                                                                                | 0.7427                                                                                       | 0.5281                                     |
| 4.    | EtOAc                           | 280                                                             | 373                                                           | 7.1560                                                                                | 0.8904                                                                                       | 0.6748                                     |
| 5.    | Methanol                        | 277                                                             | 376                                                           | 7.2067                                                                                | 0.9505                                                                                       | 0.2489                                     |
| 6.    | CH <sub>3</sub> CN              | 279                                                             | 373                                                           | 7.1685                                                                                | 0.9032                                                                                       | 0.1697                                     |
| 7.    | DMF                             | 282                                                             | 376                                                           | 3.1415                                                                                | 0.8865                                                                                       | 0.8152                                     |
| 8.    | DMSO                            | 284                                                             | 378                                                           | 6.3665                                                                                | 0.8756                                                                                       | 0.7471                                     |

<sup>a</sup>Recorded at 298 K.<sup>b</sup>Stoke's shift =  $\lambda_{\max, \text{abs}} - \lambda_{\max, \text{emi}}$  [ $\text{cm}^{-1}$ ].<sup>c</sup>Determined with anthracene as a standard  $\Phi_f = 0.27$  at excitation wavelength 246 nm.

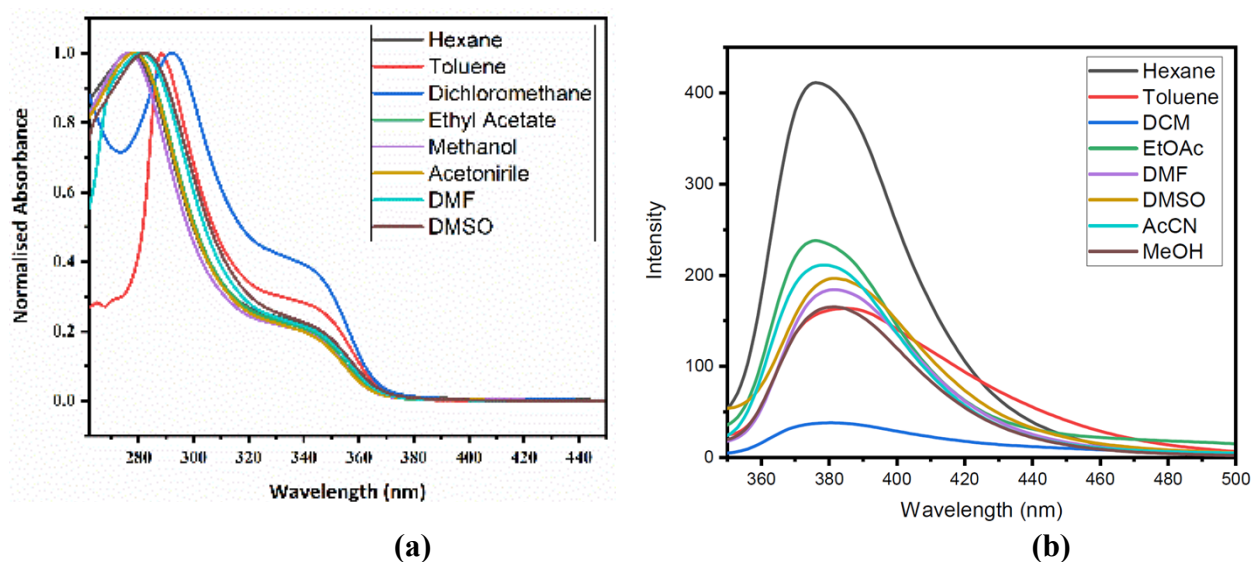**SI Figure :4 :**

(a) Normalised absorption spectra of compound **6f** recorded at C  $2 \times 10^{-5}$  M at 298 K

(b) Normalised emission spectra of compound **6f** recorded at C  $2 \times 10^{-5}$  M at 298 K

**SI Table :4 :** Photophysical properties of compound **6f**

| Entry | Solvent                         | Absorption <sup>a</sup><br>$\lambda_{\max, \text{abs}}$<br>(nm) | Emission <sup>a</sup><br>$\lambda_{\max, \text{emi}}$<br>(nm) | Molar<br>Extinction<br>Coefficient<br>$\times 10^4$<br>( $\epsilon$ ) $\pi$ - $\pi^*$ | Stoke's<br>shift<br>$\Delta \bar{\nu}$<br>$\times 10^4$<br>( $\text{cm}^{-1}$ ) <sup>b</sup> | Quantum<br>yield ( $\Phi_f$ ) <sup>c</sup> |
|-------|---------------------------------|-----------------------------------------------------------------|---------------------------------------------------------------|---------------------------------------------------------------------------------------|----------------------------------------------------------------------------------------------|--------------------------------------------|
| 1.    | Hexane                          | 277                                                             | 376                                                           | 8.8975                                                                                | 0.9505                                                                                       | 0.0904                                     |
| 2.    | Toluene                         | 288                                                             | 385                                                           | 4.7150                                                                                | 0.8748                                                                                       | 0.0746                                     |
| 3.    | CH <sub>2</sub> Cl <sub>2</sub> | 292                                                             | 380                                                           | 3.1770                                                                                | 0.7930                                                                                       | 0.0242                                     |
| 4.    | EtOAc                           | 279                                                             | 376                                                           | 6.2330                                                                                | 0.9246                                                                                       | 0.0495                                     |
| 5.    | Methanol                        | 276                                                             | 381                                                           | 6.0666                                                                                | 0.9985                                                                                       | 0.0450                                     |

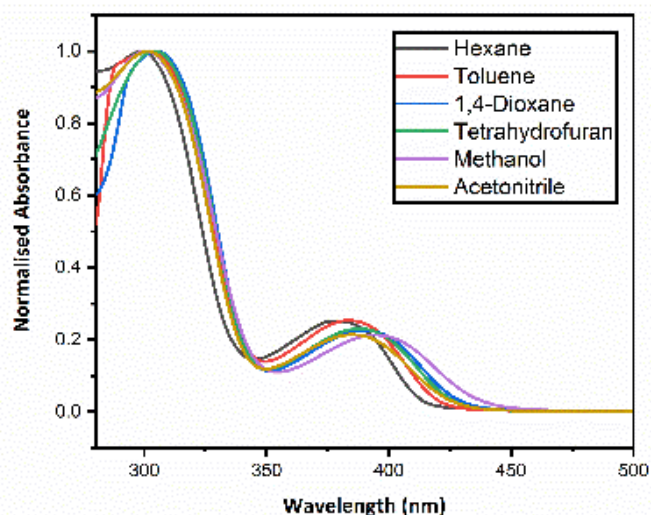

(a)

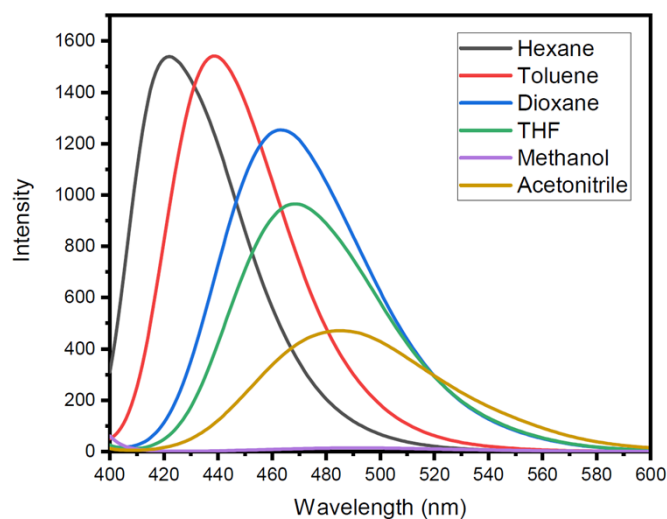

(b)

**SI Figure :5 :**(a) Normalised absorption spectra of compound **8** recorded at  $C 2 \times 10^{-5}$  M at 298 K(b) Normalised emission spectra of compound **8** recorded at  $C 2 \times 10^{-5}$  M at 298 K**SI Table :5 :** Photophysical properties of compound **8**

| Entry | Solvent            | Absorption <sup>a</sup><br>$\lambda_{\max, \text{abs}}$ (nm) | Emission <sup>a</sup><br>$\lambda_{\max, \text{emi}}$<br>(nm) | Molar Extinction<br>Coefficient<br>$\times 10^4$<br>( $\epsilon$ ) $\pi$ - $\pi^*$ | Stoke's shift $\Delta$<br>$\times 10^4$<br>$\bar{\nu}$<br>( $\text{cm}^{-1}$ ) <sup>b</sup> |
|-------|--------------------|--------------------------------------------------------------|---------------------------------------------------------------|------------------------------------------------------------------------------------|---------------------------------------------------------------------------------------------|
| 1.    | Hexane             | 299, 379                                                     | 421                                                           | 1.4301                                                                             | 0.9691                                                                                      |
| 2.    | Toluene            | 302, 384                                                     | 438                                                           | 2.6726                                                                             | 1.0281                                                                                      |
| 3.    | Dioxane            | 305, 390                                                     | 468                                                           | 2.9364                                                                             | 1.1419                                                                                      |
| 4.    | THF                | 304, 388                                                     | 463                                                           | 3.1162                                                                             | 1.1296                                                                                      |
| 5.    | Methanol           | 301, 395                                                     | 492                                                           | 2.9746                                                                             | 1.2897                                                                                      |
| 6.    | CH <sub>3</sub> CN | 301, 385                                                     | 484                                                           | 3.2491                                                                             | 1.2561                                                                                      |

<sup>a</sup>Recorded at 298 K.<sup>b</sup>Stoke's shift =  $\lambda_{\max, \text{abs}} - \lambda_{\max, \text{emi}}$  [ $\text{cm}^{-1}$ ].



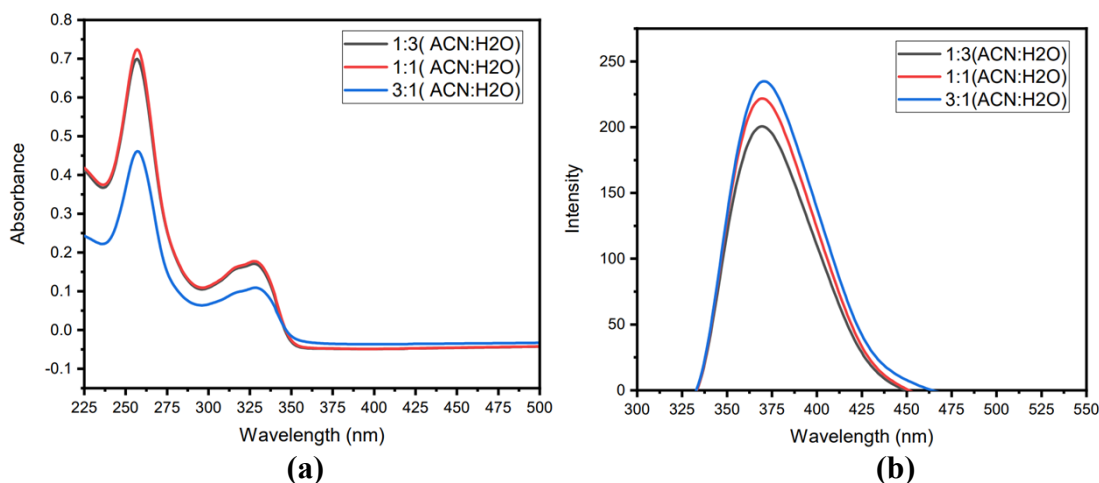**SI Figure :6 :**

(a) Absorption spectra of compound **3a** recorded at C  $2 \times 10^{-5}$  M at 298 K in acetonitrile:Water (1:3, 1:1, 3:1). ( $\lambda_{\text{max}}$ , abs (nm))= 257 nm)

(b) Emission spectra of compound **3a** recorded at C  $2 \times 10^{-5}$  M at 298 K in acetonitrile:Water (1:3, 1:1, 3:1). ( $\lambda_{\text{max}}$ , abs (nm))=369 nm)

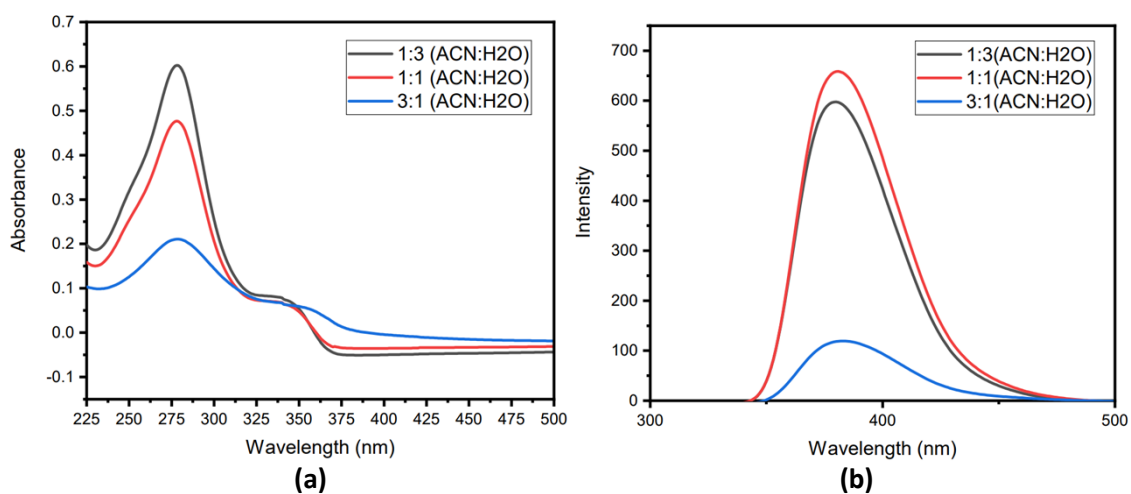**SI Figure :7 :**

(a) Absorption spectra of compound **6a** recorded at C  $2 \times 10^{-5}$  M at 298 K in acetonitrile:Water (1:3, 1:1, 3:1). ( $\lambda_{\text{max}}$ , abs (nm))=278 nm)

(b) Emission spectra of compound **6a** recorded at C  $2 \times 10^{-5}$  M at 298 K in

acetonitrile:Water (1:3, 1:1, 3:1). ( $\lambda_{\text{max}}$ , abs (nm))= 380nm)

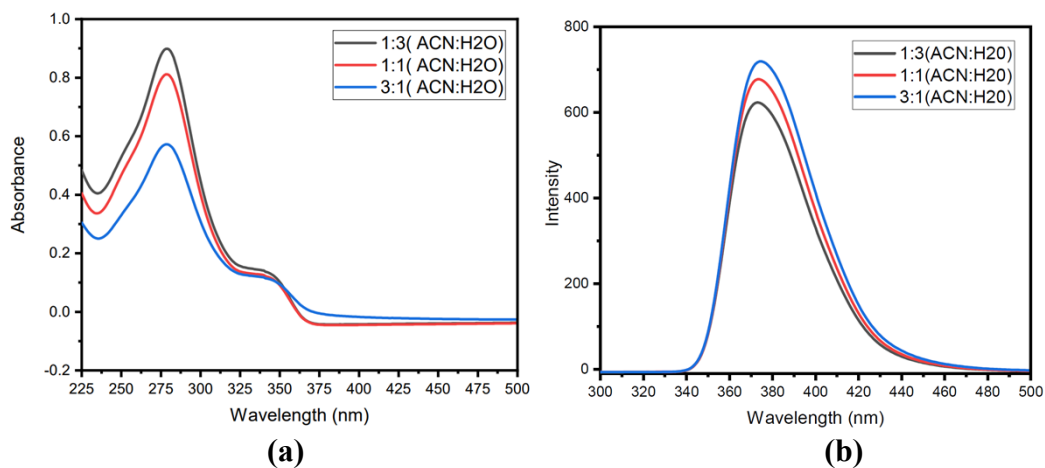

**SI Figure :8 :**

(a) Absorption spectra of compound **6d** recorded at  $C 2 \times 10^{-5}$  M at 298 K in acetonitrile:Water (1:3, 1:1, 3:1). ( $\lambda_{\text{max}}$ , abs (nm))=279 nm)

(b) Emission spectra of compound **6d** recorded at  $C 2 \times 10^{-5}$  M at 298 K in acetonitrile:Water (1:3, 1:1, 3:1). ( $\lambda_{\text{max}}$ , abs (nm))=375 nm)

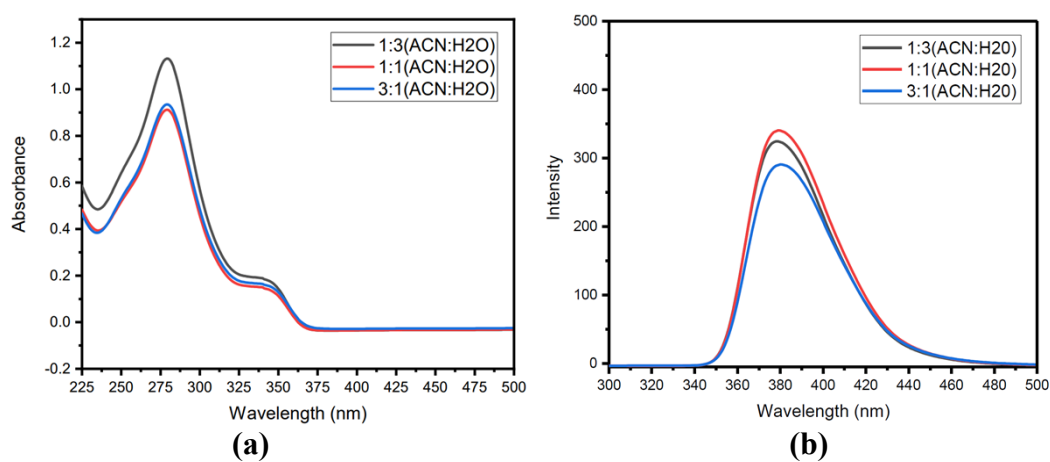

**SI Figure :9 :**

(a) Absorption spectra of compound **6f** recorded at  $C 2 \times 10^{-5}$  M at 298 K in acetonitrile:Water (1:3, 1:1, 3:1). ( $\lambda_{\text{max}}$ , abs (nm))=279 nm)

(b) Emission spectra of compound **6f** recorded at  $C 2 \times 10^{-5}$  M at 298 K in acetonitrile:Water (1:3, 1:1, 3:1). ( $\lambda_{\text{max}}$ , abs (nm))=379 nm)

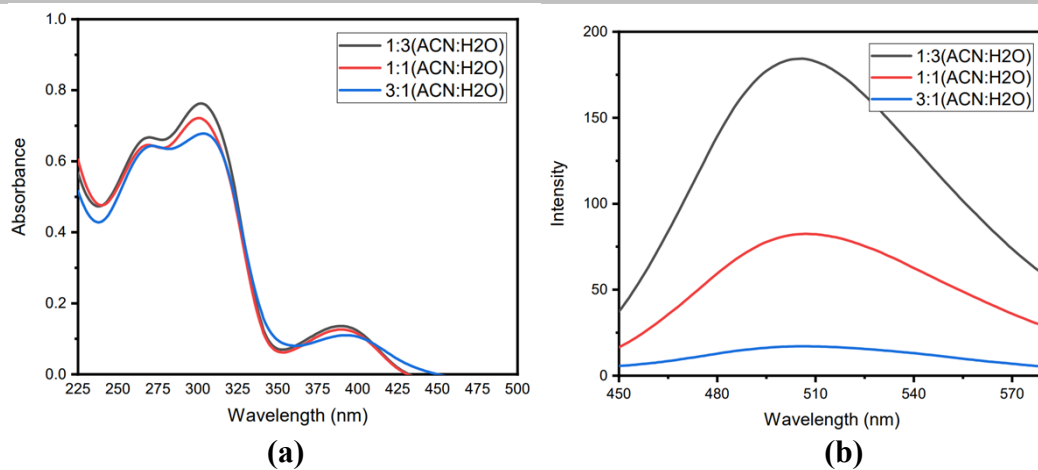

**SI Figure :10 :**

(a) Absorption spectra of compound **8** recorded at  $C 2 \times 10^{-5} \text{ M}$  at 298 K in acetonitrile:Water (1:3, 1:1, 3:1). ( $\lambda_{\text{max}}$ , abs (nm))=302 nm)

(b) Emission spectra of compound **8** recorded at  $C 2 \times 10^{-5} \text{ M}$  at 298 K in acetonitrile:Water (1:3, 1:1, 3:1). ( $\lambda_{\text{max}}$ , abs (nm))=506 nm)

Scanned copies of spectra ( $^1\text{H}$  and  $^{13}\text{C}$  NMR, DEPT-135, HRMS, FT-IR)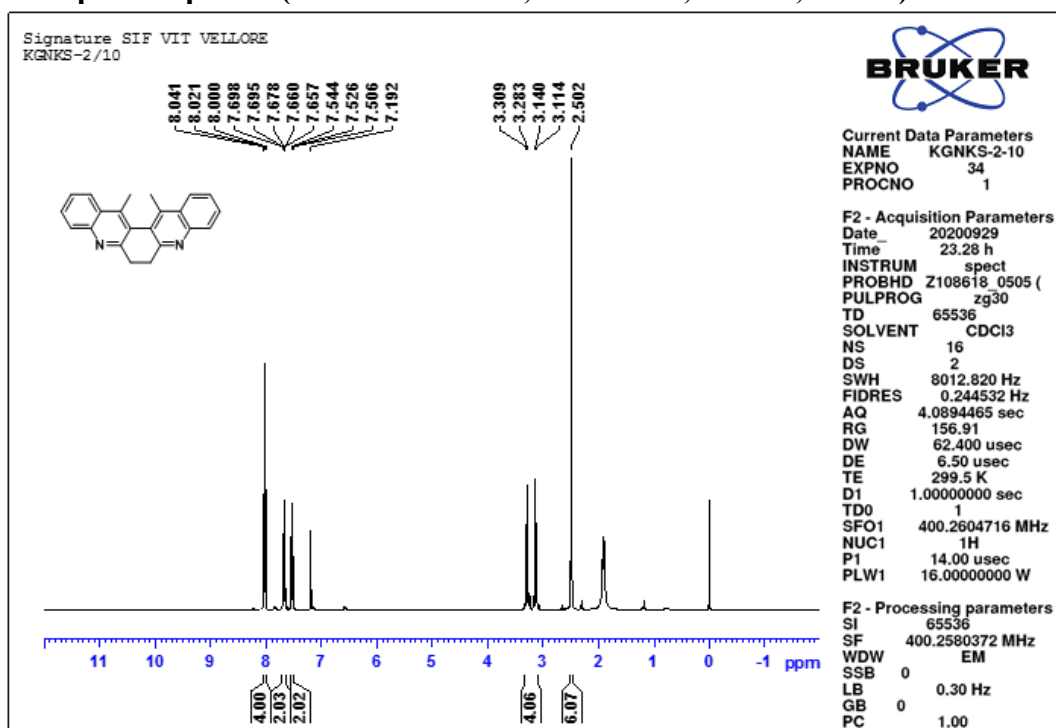SI Figure. 11:  $^1\text{H}$  NMR spectrum of compound 3a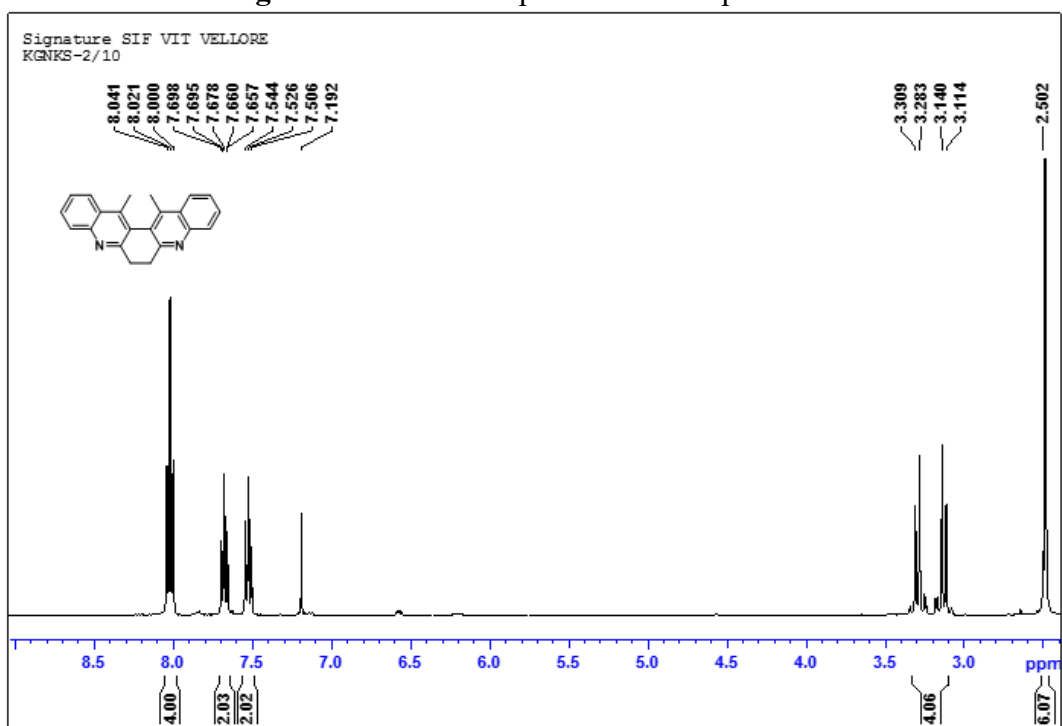SI Figure. 12: Expansion of  $^1\text{H}$  NMR spectrum of compound 3a

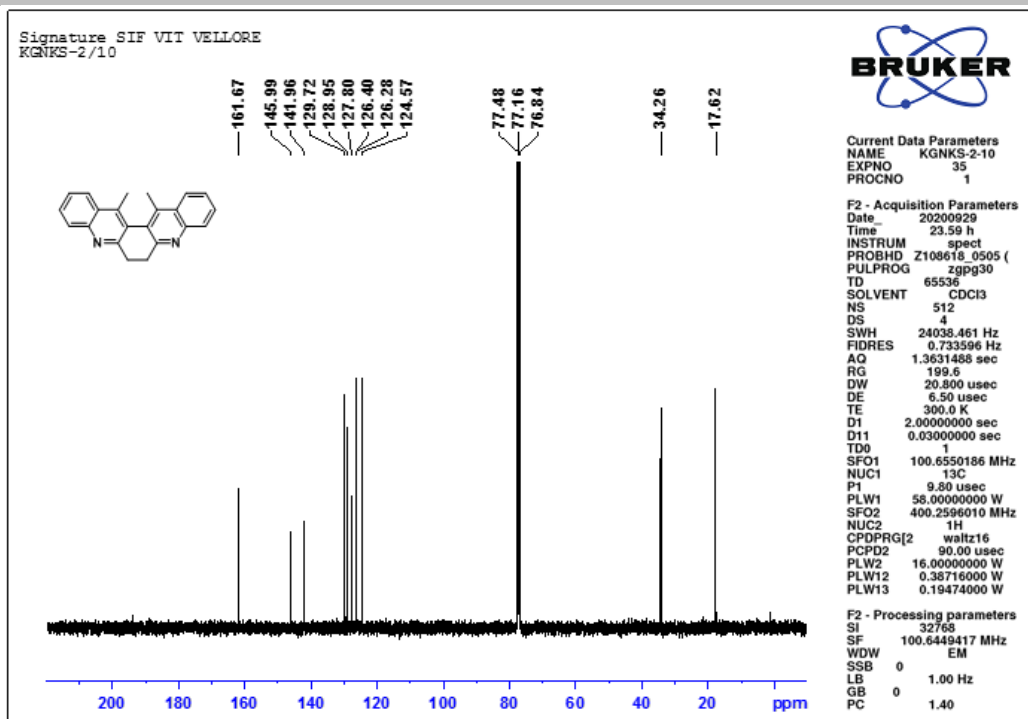SI Figure. 13:  $^{13}\text{C}$  NMR spectrum of compound **3a**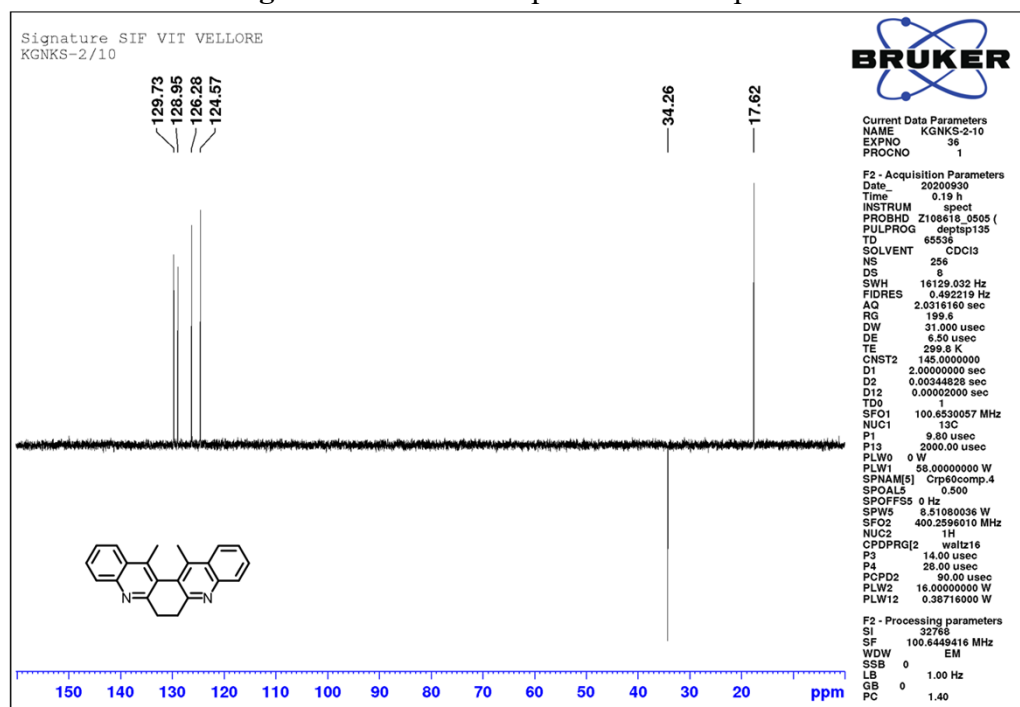SI Figure. 14: DEPT-135 spectrum of compound **3a**

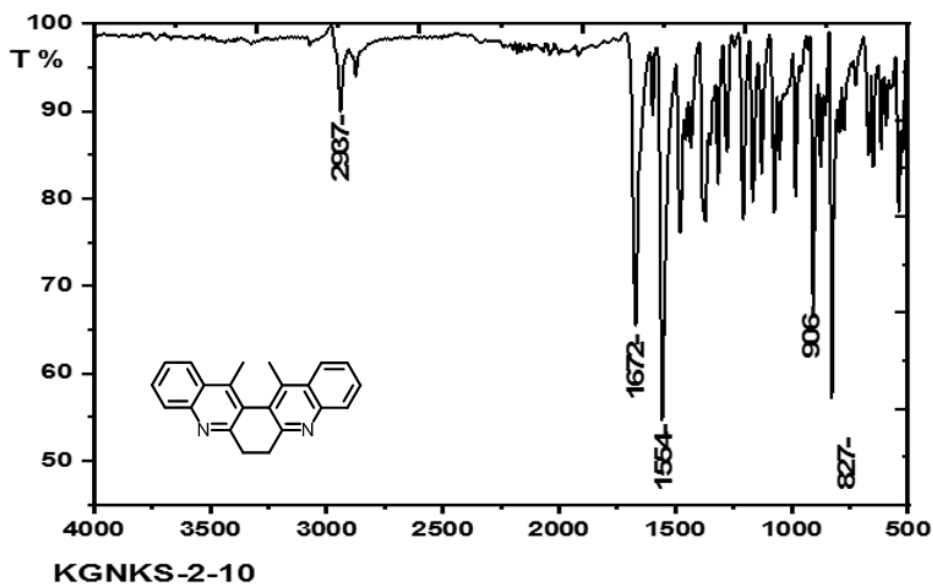

SI Figure. 15: FTIR spectrum of compound 3a

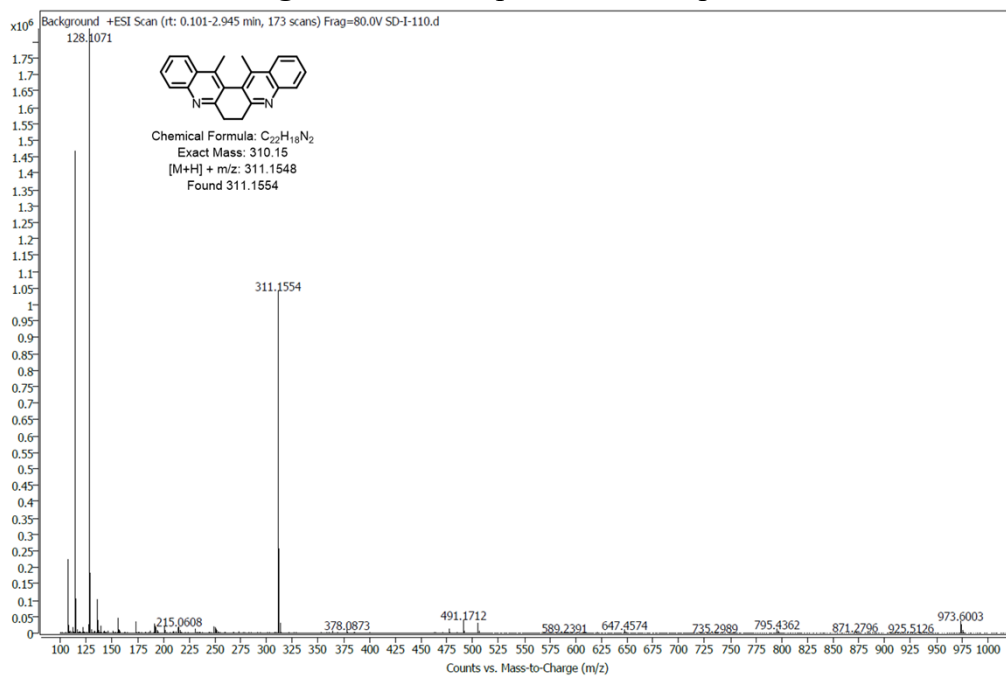

SI Figure. 16: HRMS spectrum of compound 3a

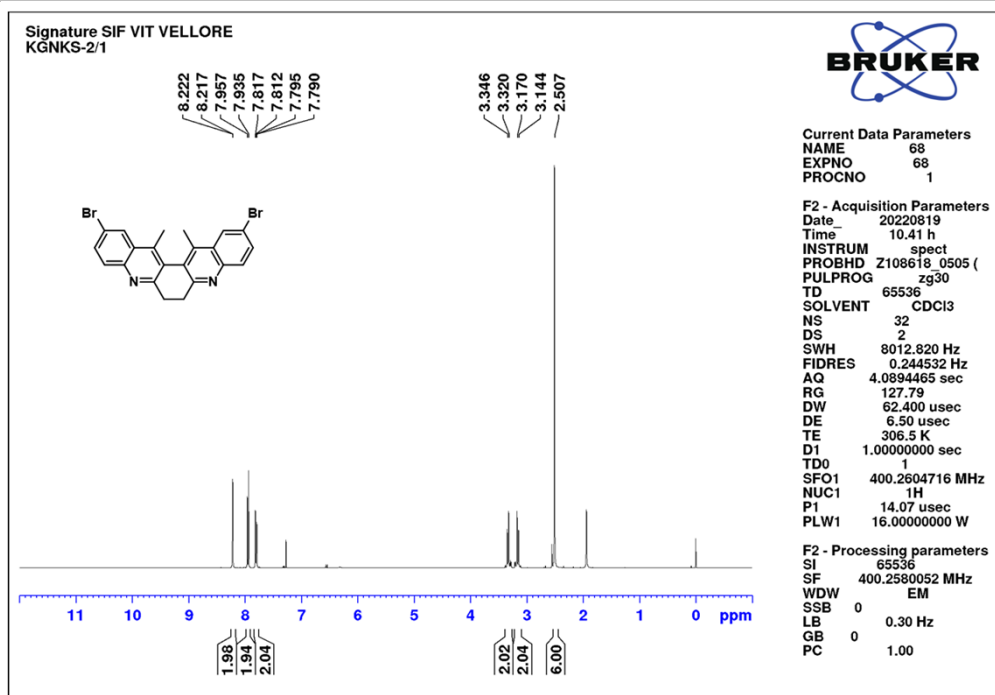SI Figure. 17:  $^1\text{H}$  NMR spectrum of compound 3b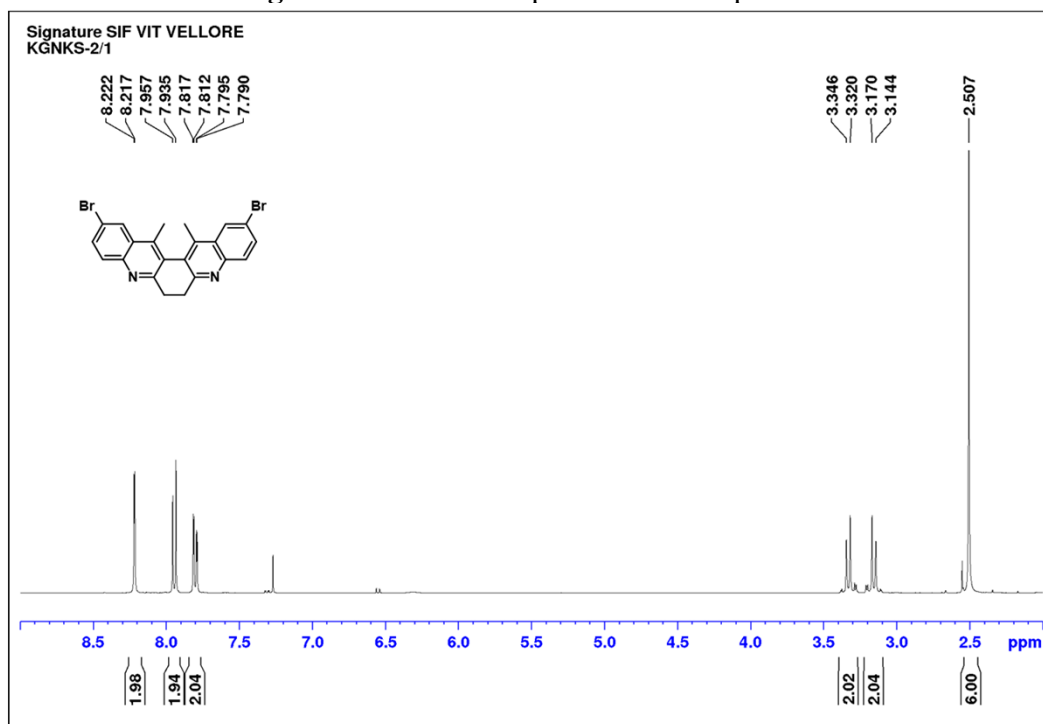SI Figure. 18: Expansion of  $^1\text{H}$  NMR spectrum of compound 3b

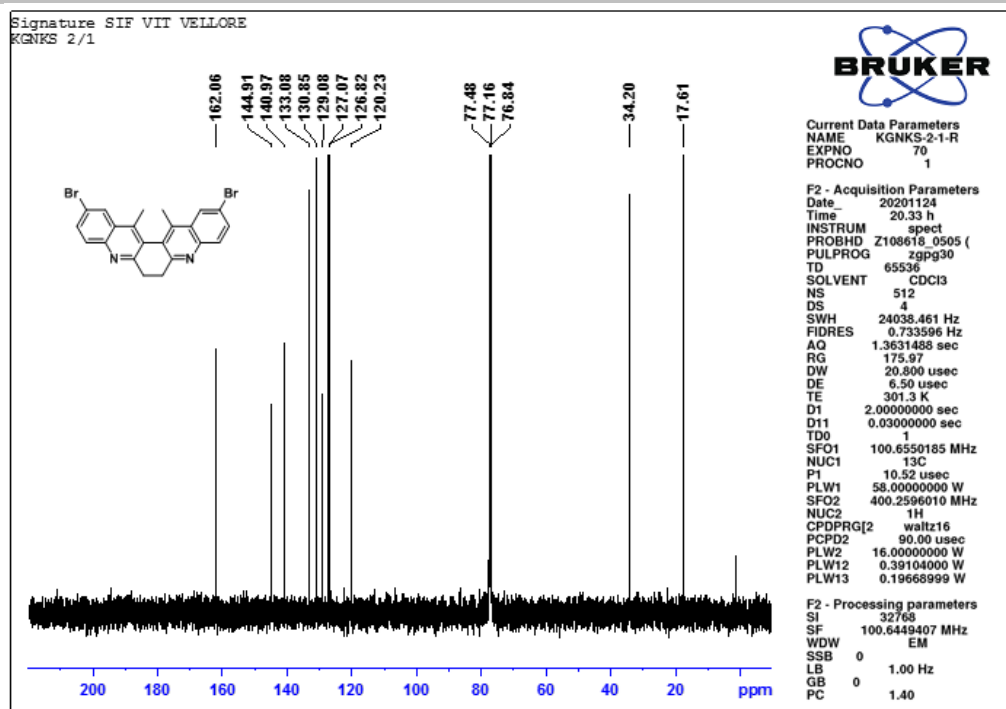SI Figure. 19:  $^{13}\text{C}$  NMR spectrum of compound **3b**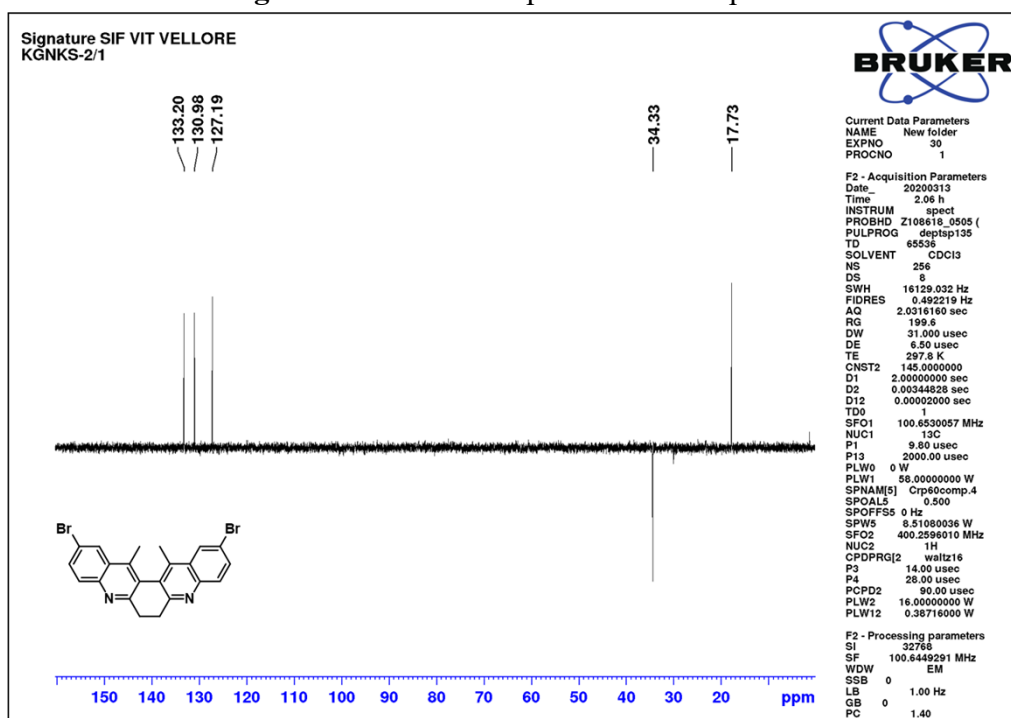SI Figure. 20: DEPT-135 spectrum of compound **3b**



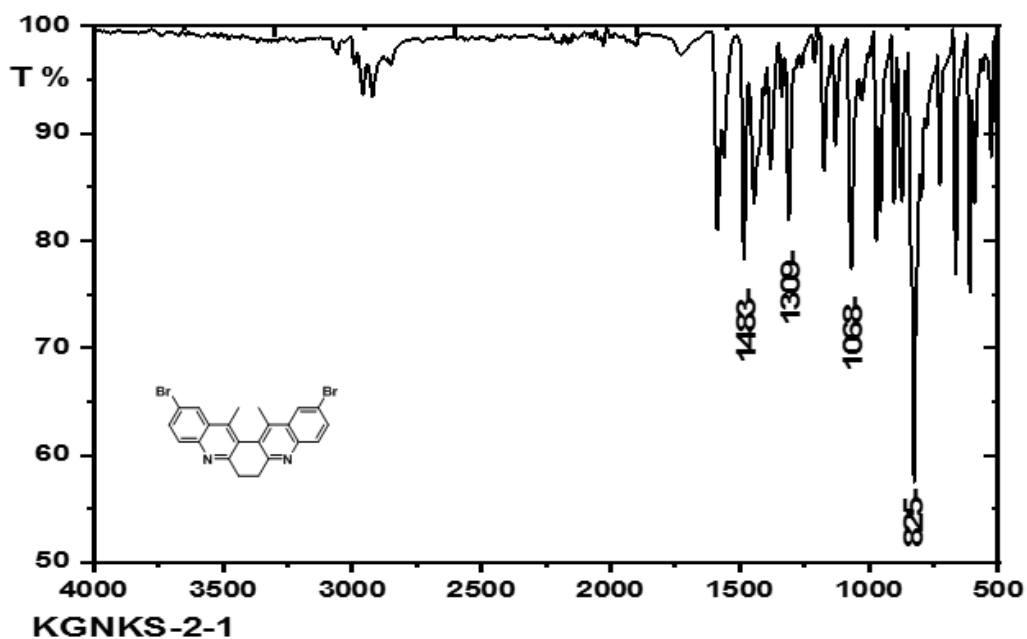

SI Figure. 21: FTIR spectrum of compound 3b

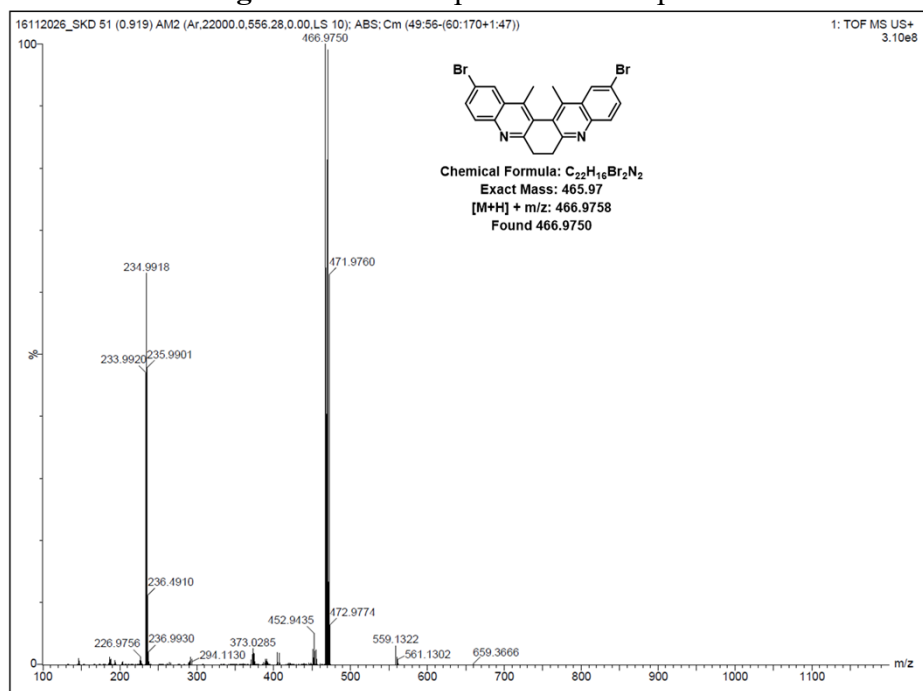

SI Figure. 22: HRMS spectrum of compound 3b

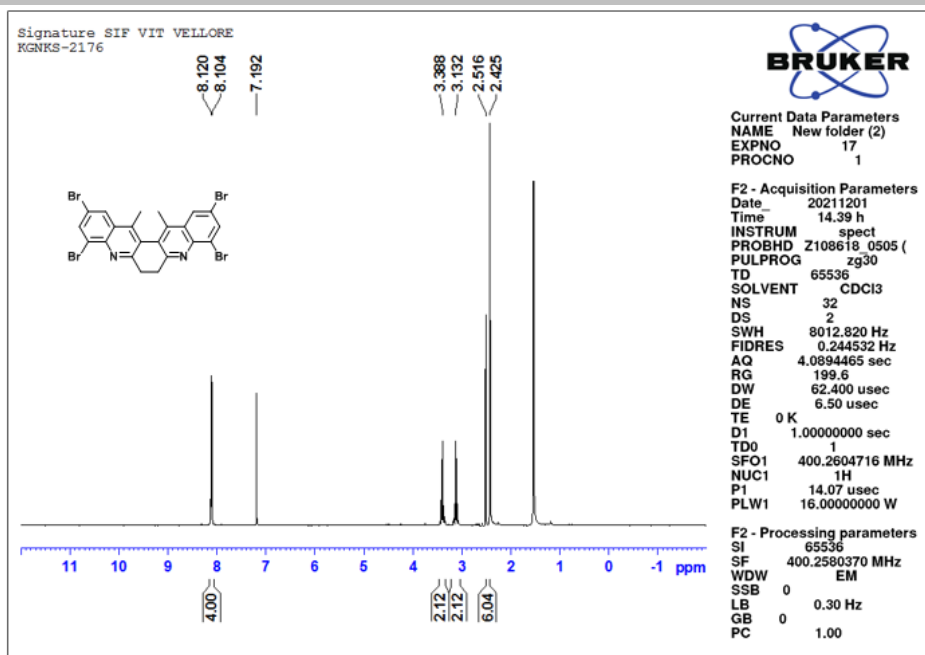SI Figure. 23:  $^1\text{H}$  NMR spectrum of compound 3c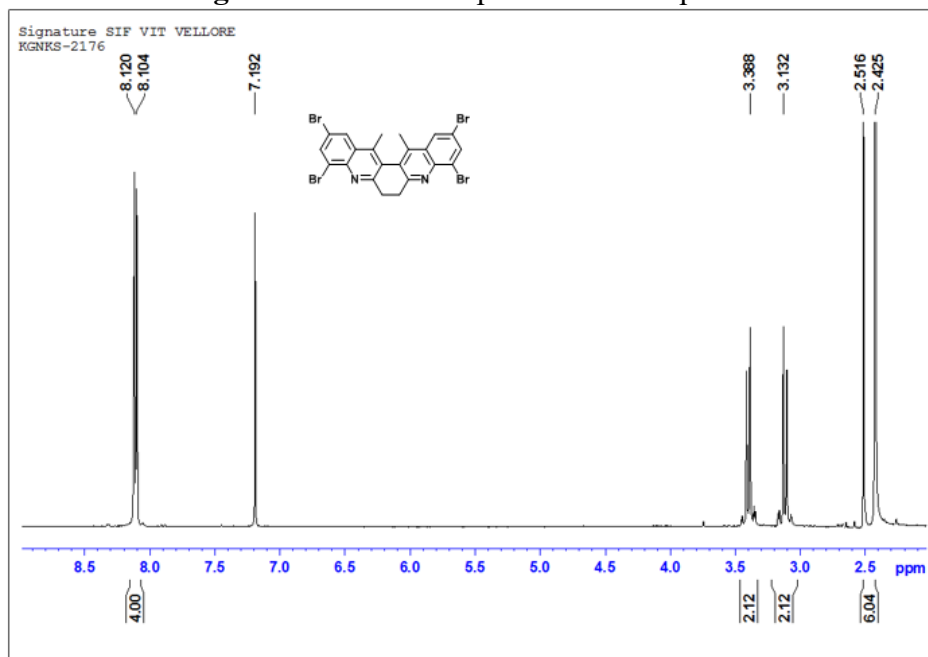SI Figure. 24: Expansion of  $^1\text{H}$  NMR spectrum of compound 3c

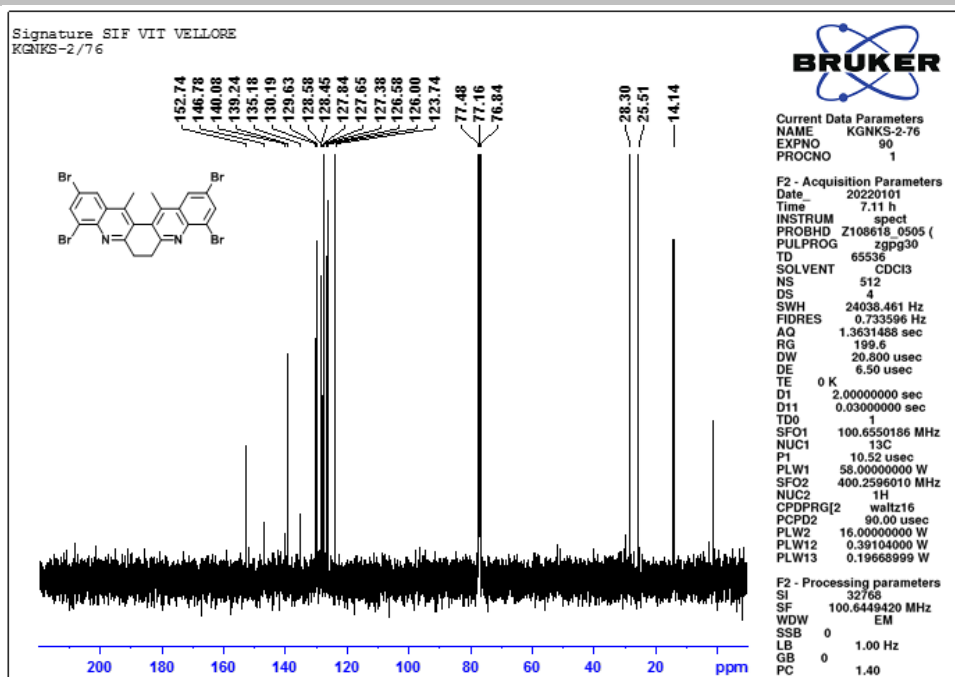SI Figure. 25:  $^{13}\text{C}$  NMR spectrum of compound **3c**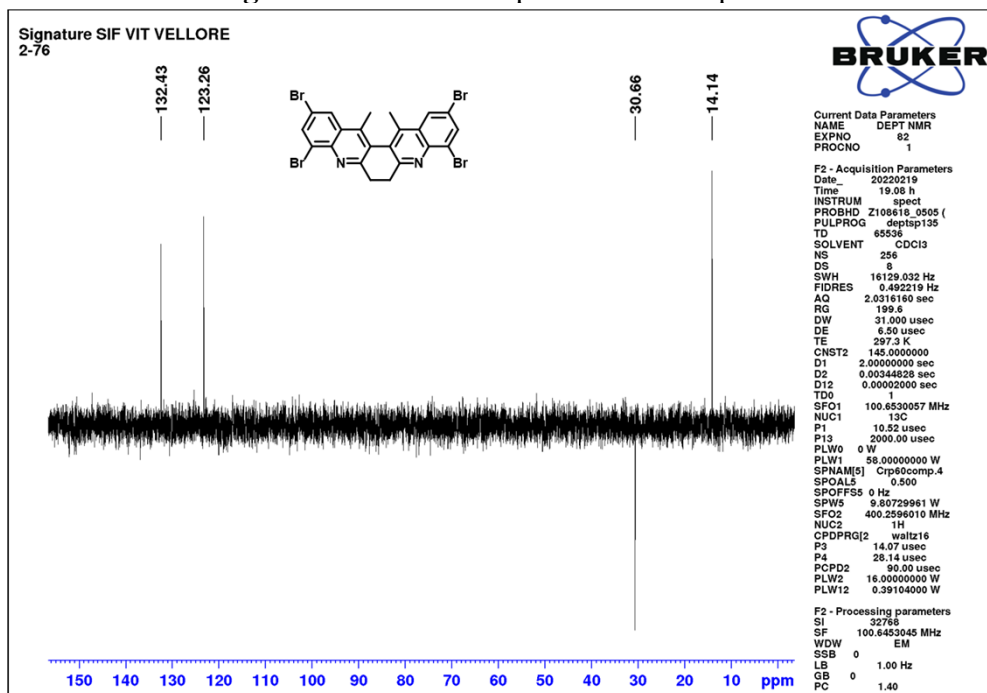SI Figure. 26: DEPT-135 spectrum of compound **3c**

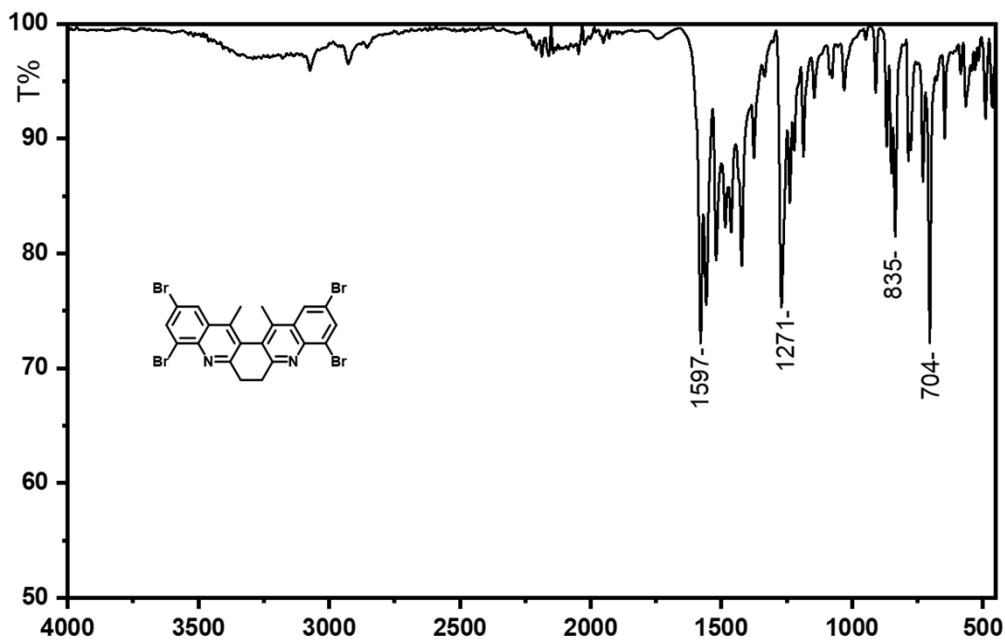

KGNKS-2-76

SI Figure. 27: FTIR spectrum of compound 3c

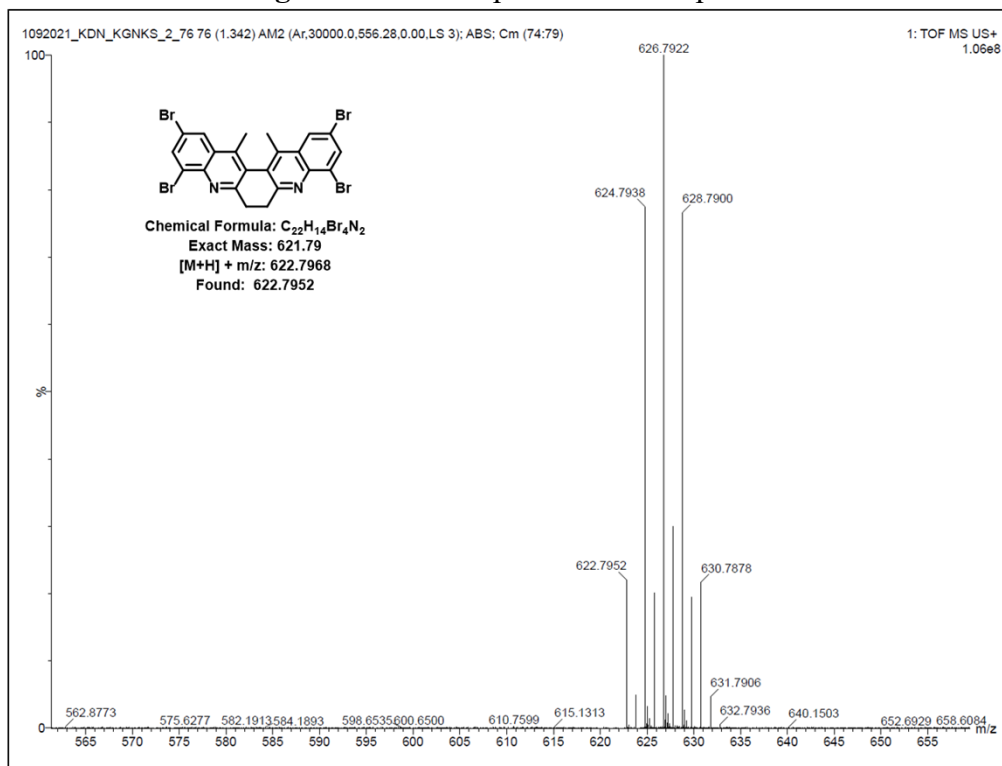

SI Figure. 28: HRMS spectrum of compound 3c

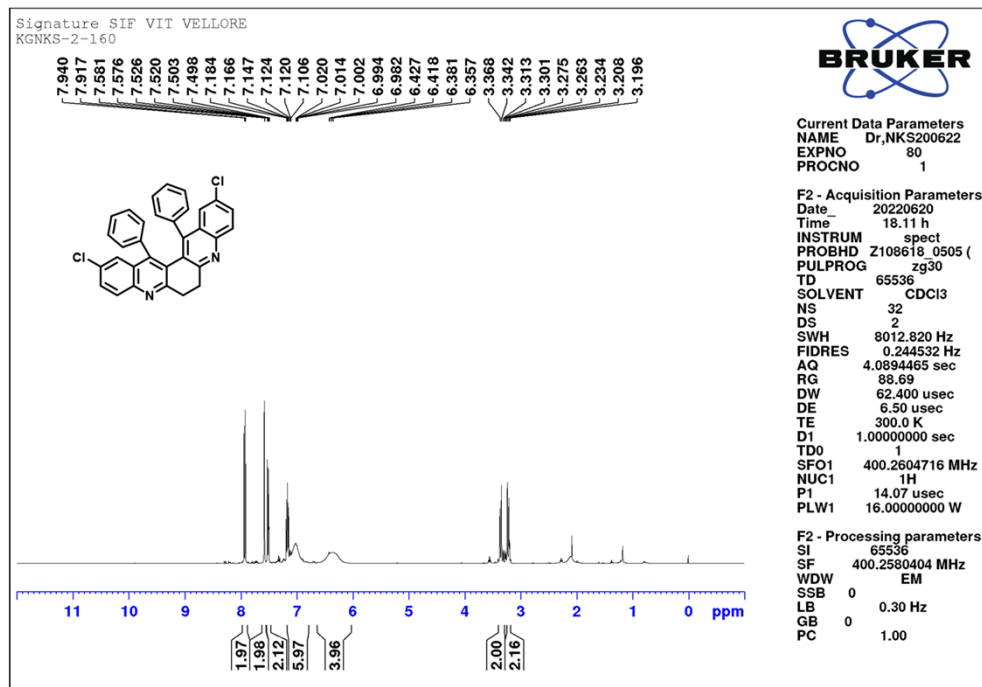SI Figure. 29:  $^1\text{H}$  NMR spectrum of compound 3d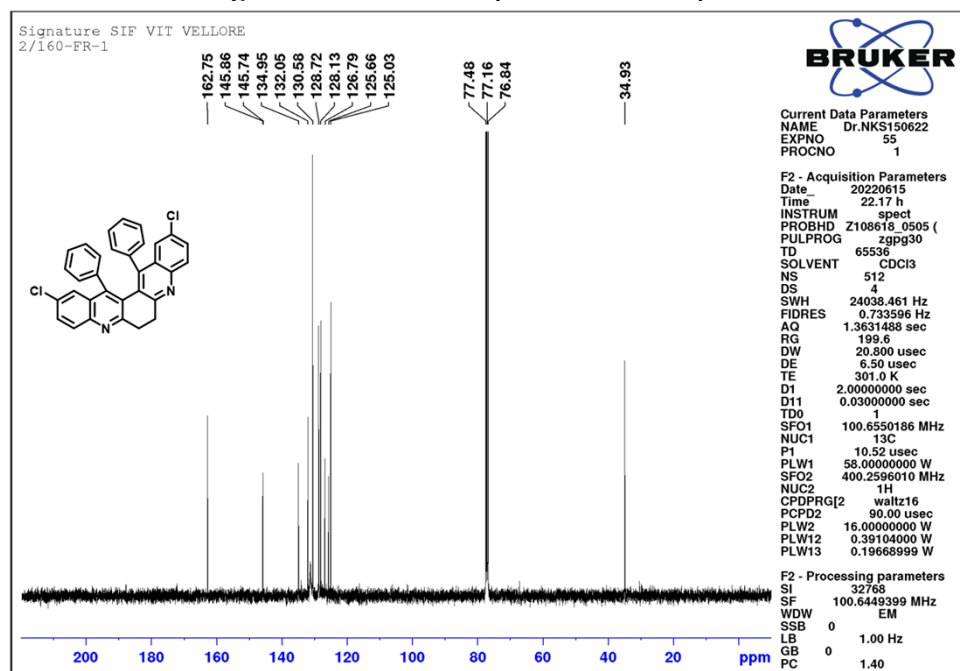SI Figure. 30:  $^{13}\text{C}$  NMR spectrum of compound 3d

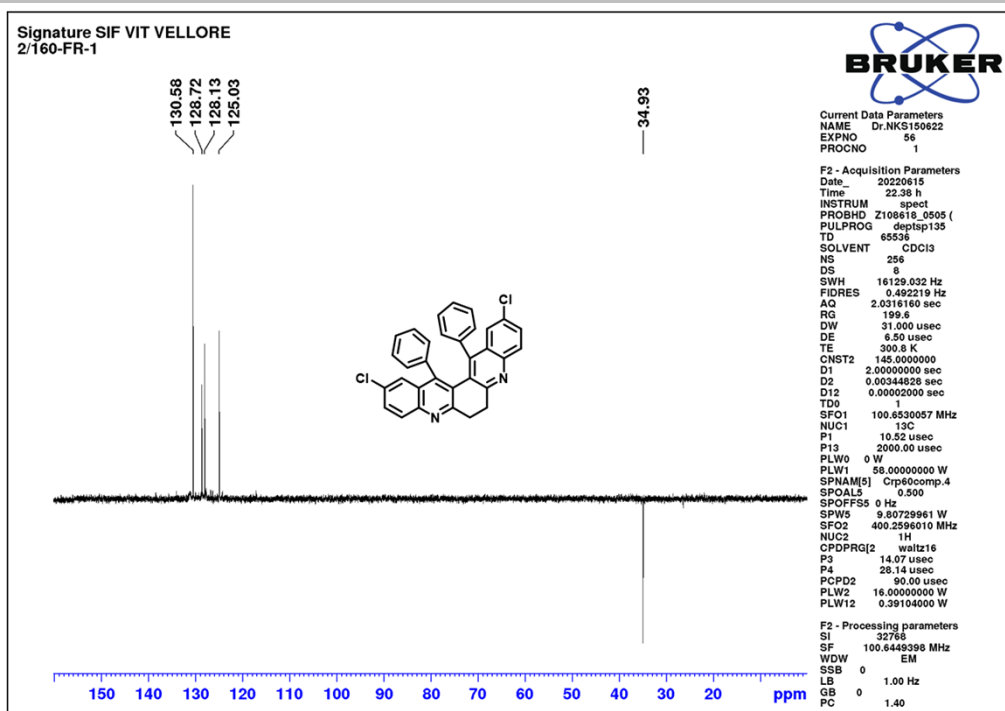

SI Figure. 31: DEPT-135 spectrum of compound 3d

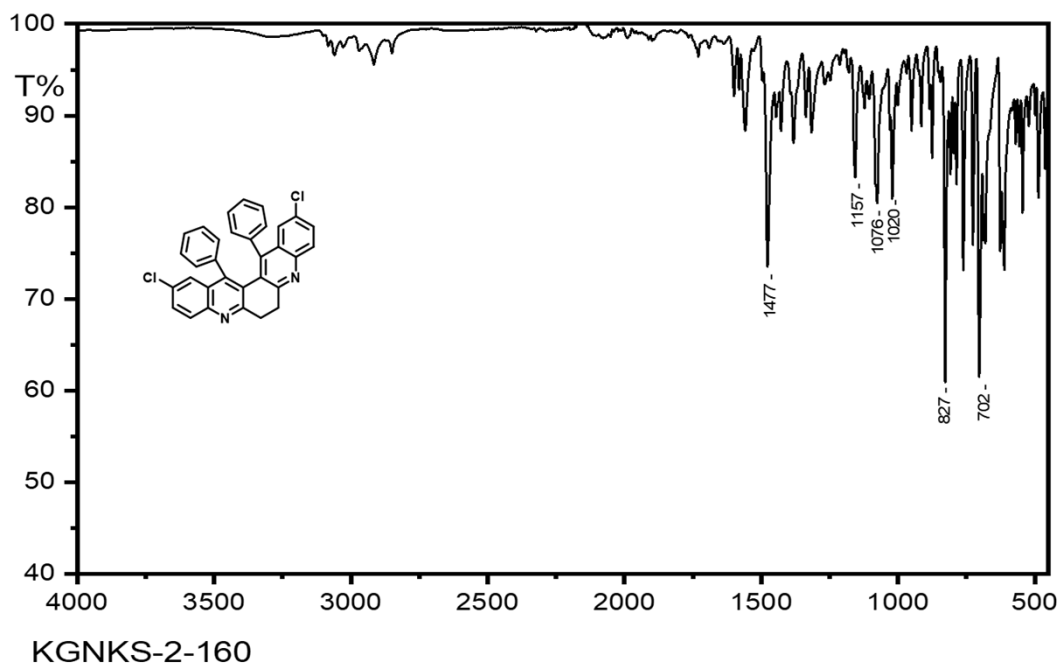

SI Figure. 32: FT-IR spectrum of compound 3d

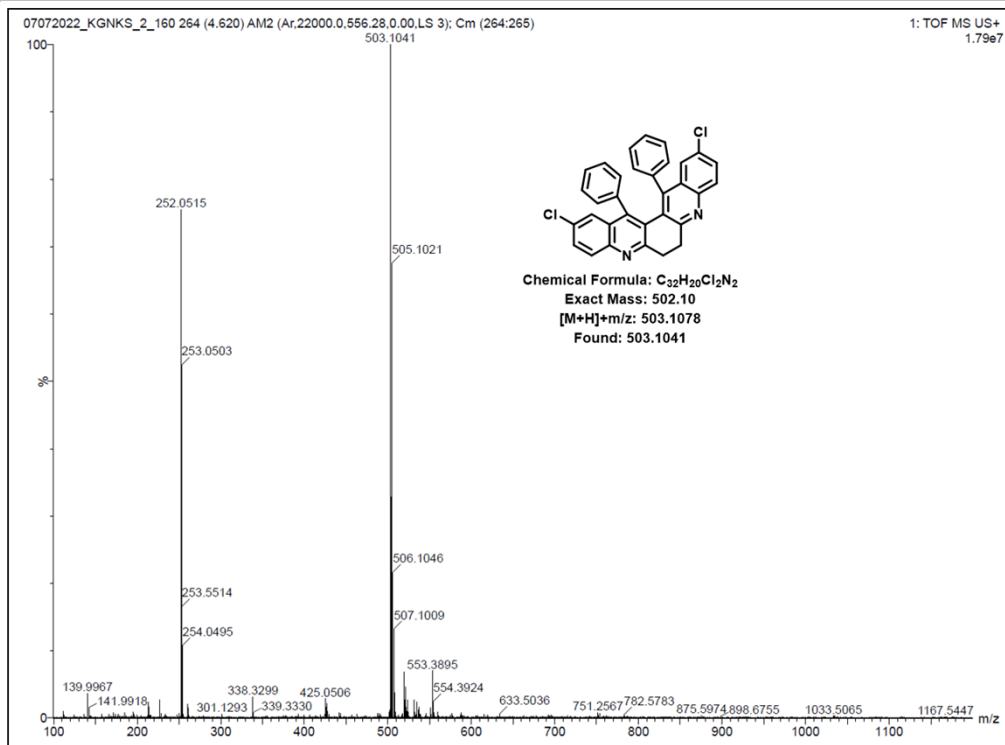

SI Figure. 33: HRMS Spectrum of compound 3d

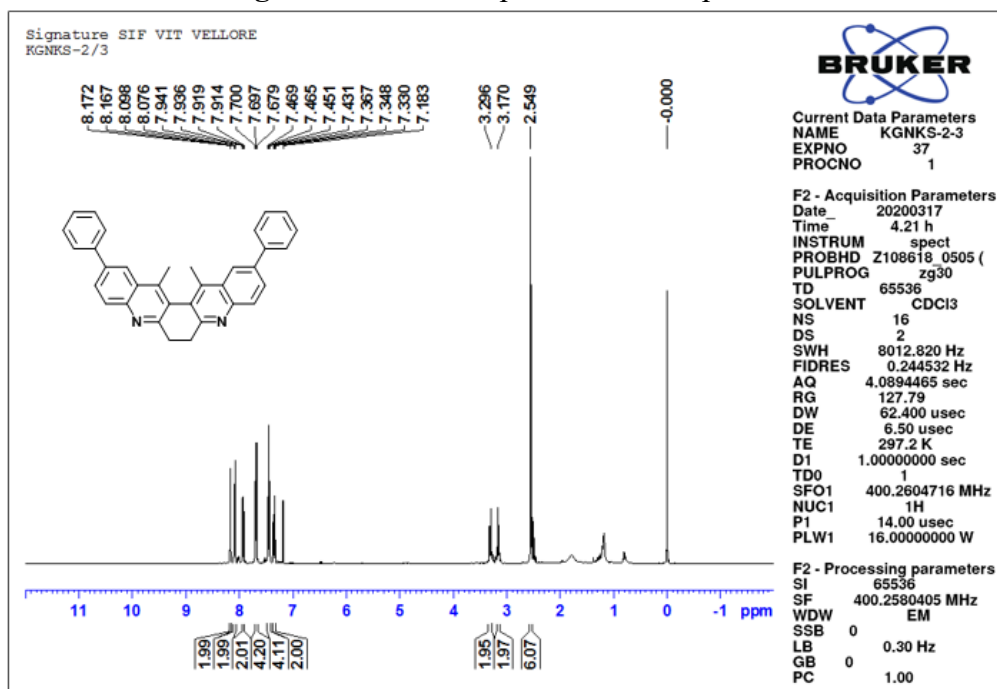SI Figure. 34:  $^1H$  NMR spectrum of compound 6a

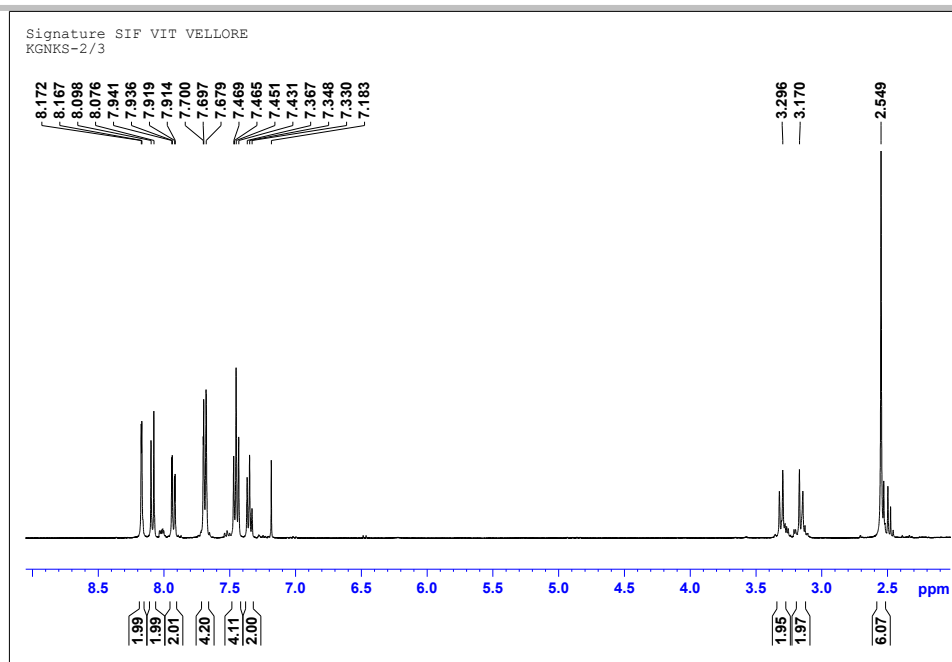SI Figure. 35: Expansion of  $^1\text{H}$  NMR spectrum of compound **6a**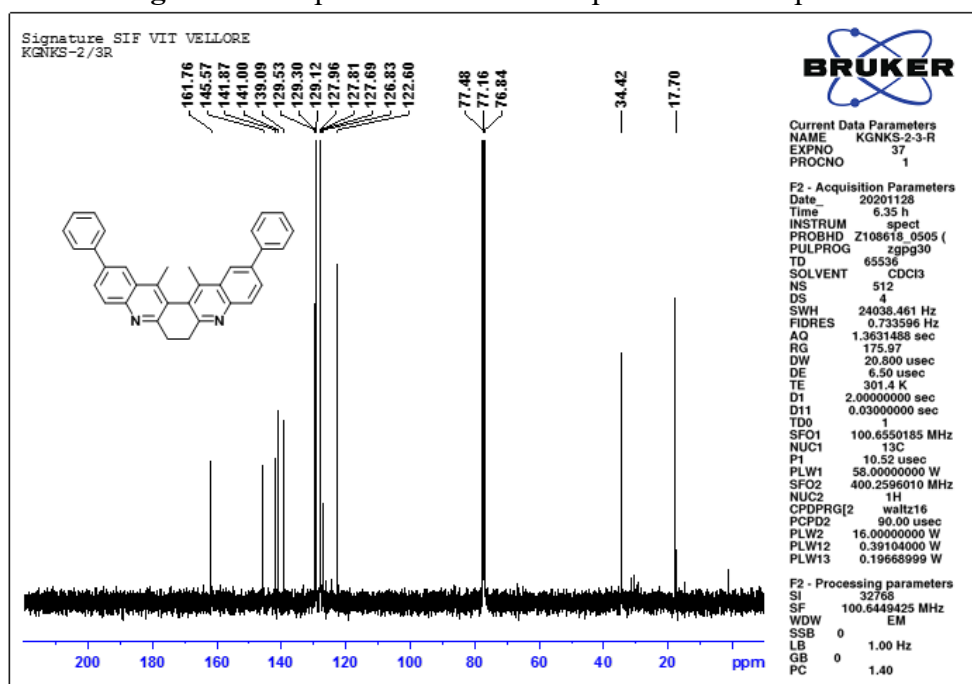SI Figure. 36:  $^{13}\text{C}$  NMR spectrum of compound **6a**



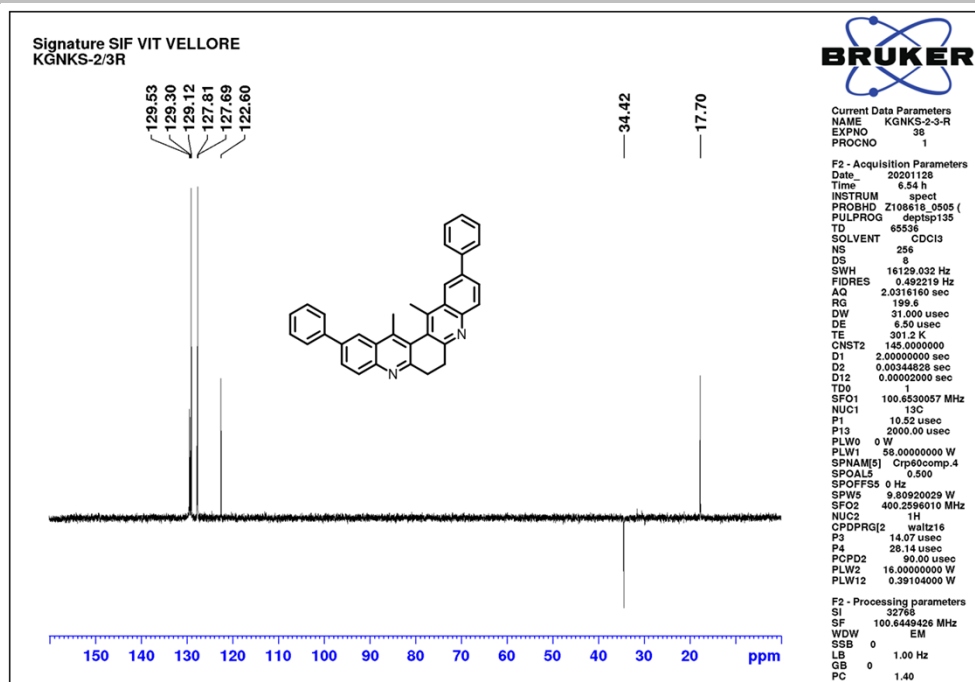

SI Figure. 37: DEPT-135 spectrum of compound 6a

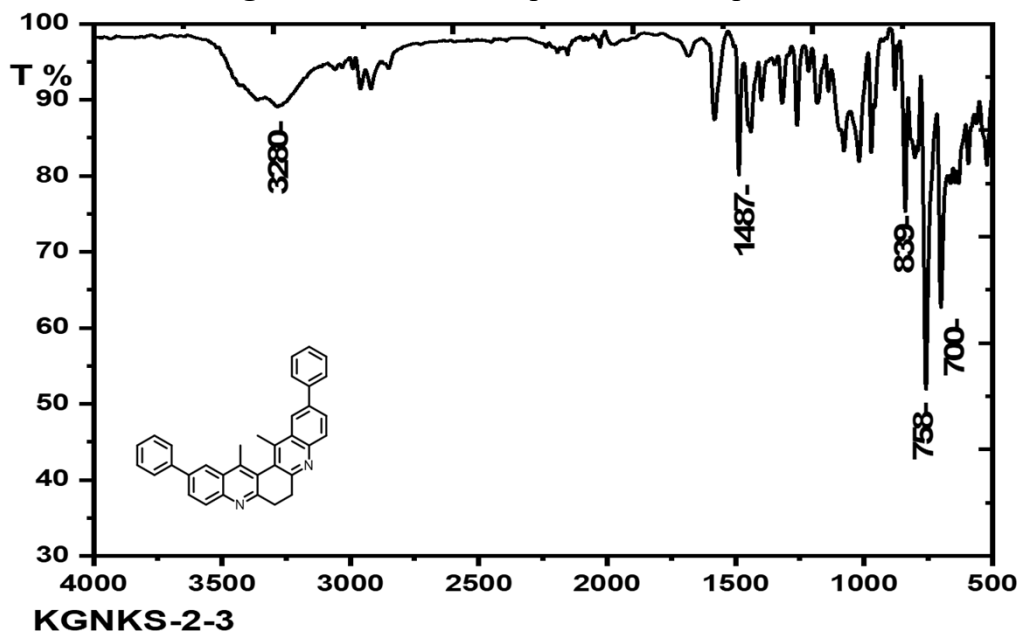

SI Figure. 38: FTIR spectrum of compound 6a

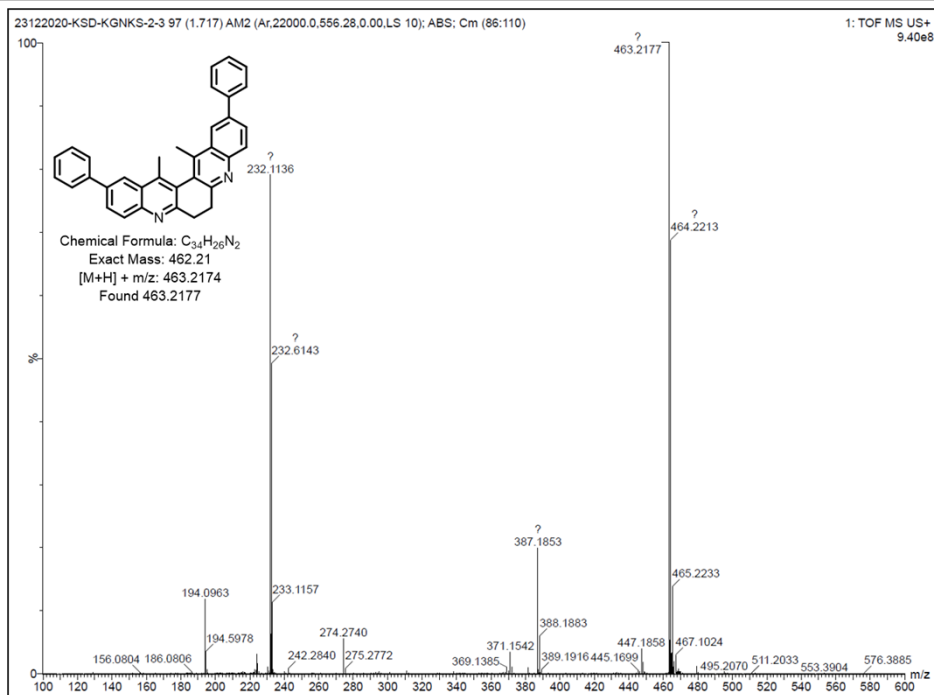

SI Figure. 39: HRMS spectrum of compound 6a

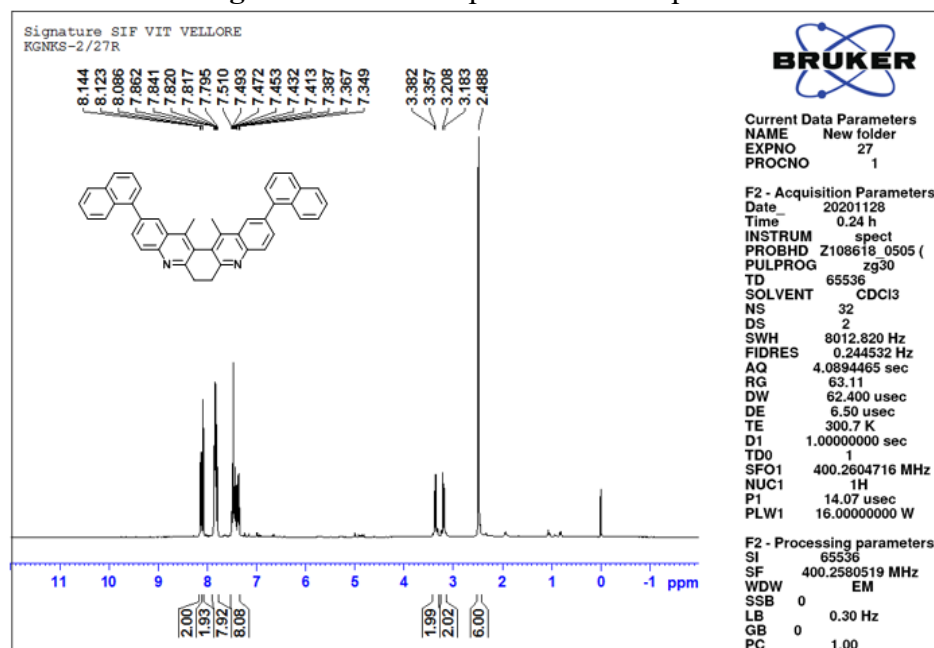SI Figure. 40: <sup>1</sup>H NMR spectrum of compound 6b

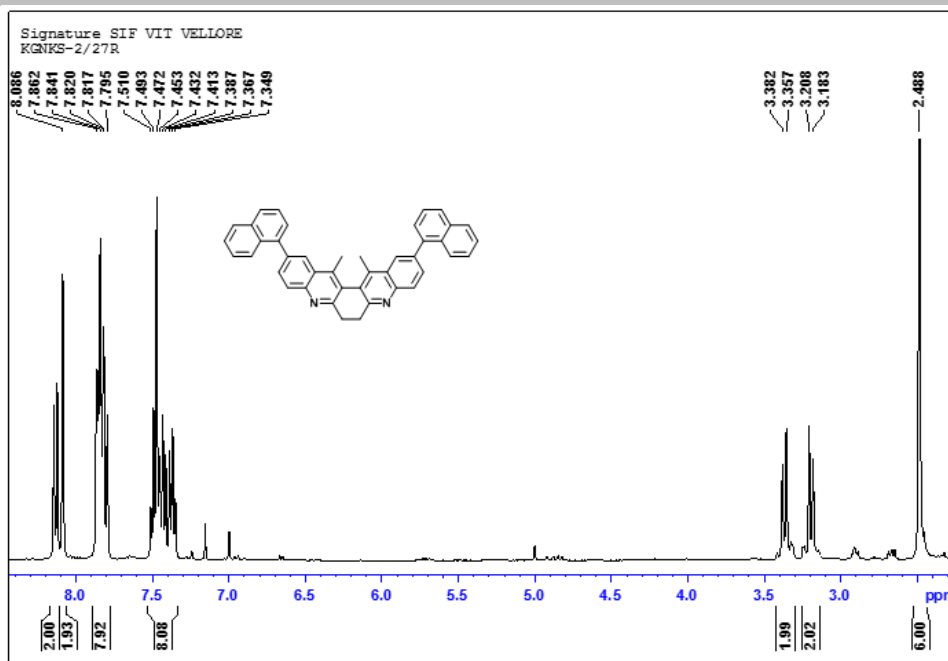SI Figure. 41: Expansion of  $^1\text{H}$  NMR spectrum of compound **6b**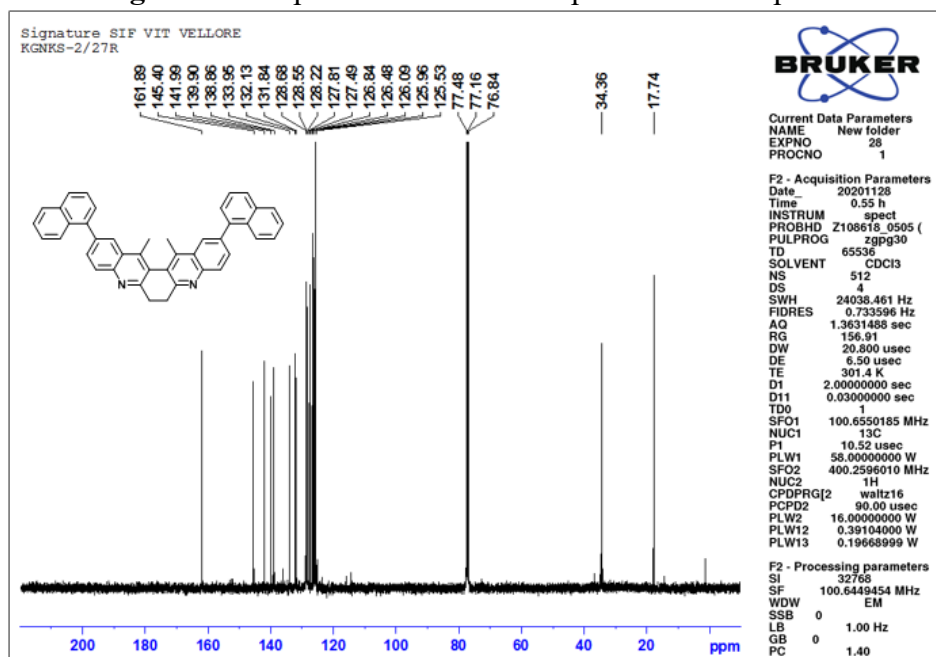SI Figure. 42:  $^{13}\text{C}$  NMR spectrum of compound **6b**

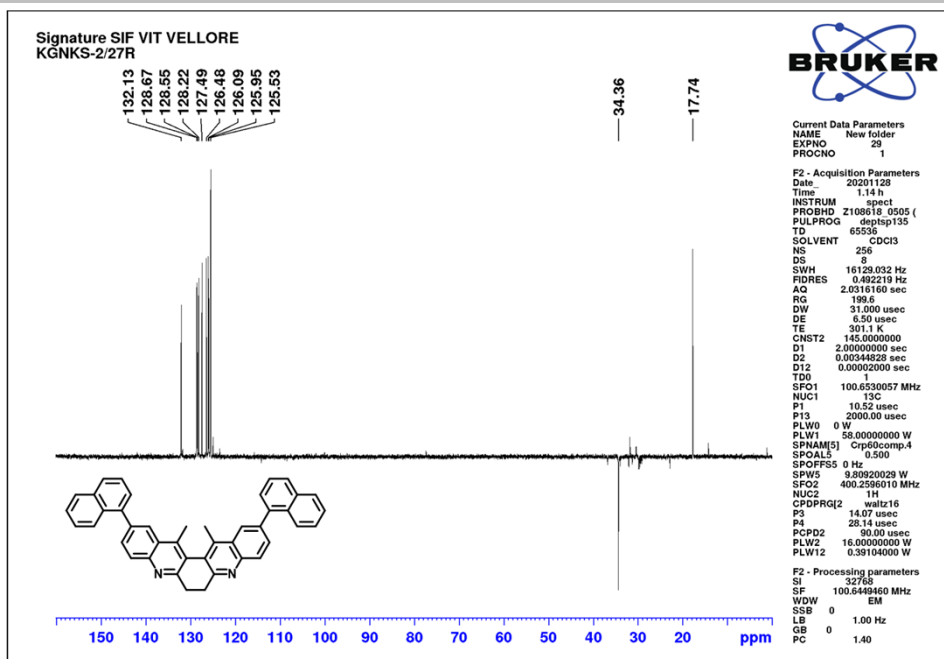SI Figure. 43: DEPT-135 spectrum of compound **6b**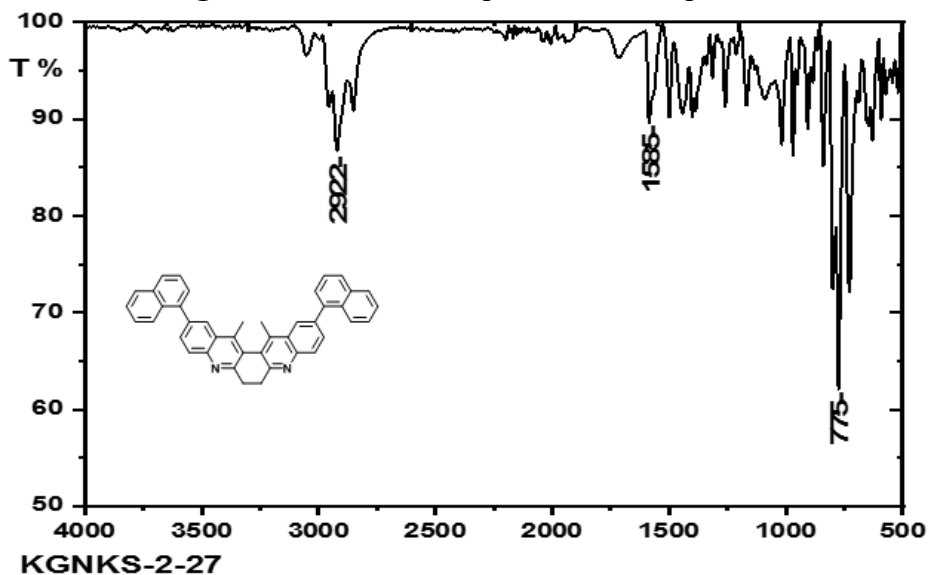SI Figure. 44: FTIR spectrum of compound **6b**

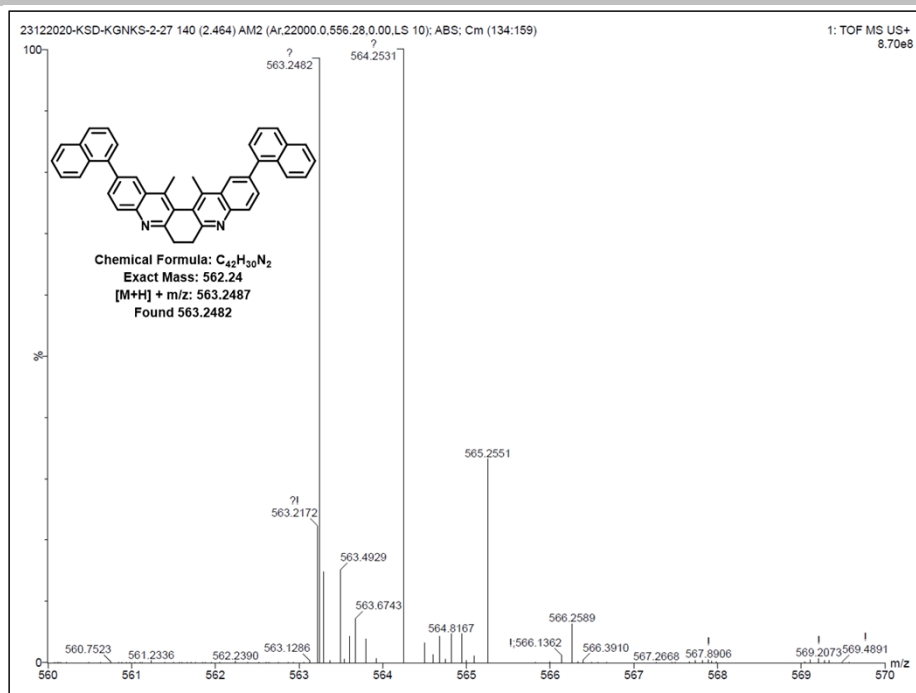

SI Figure. 45: HRMS spectrum of compound 6b

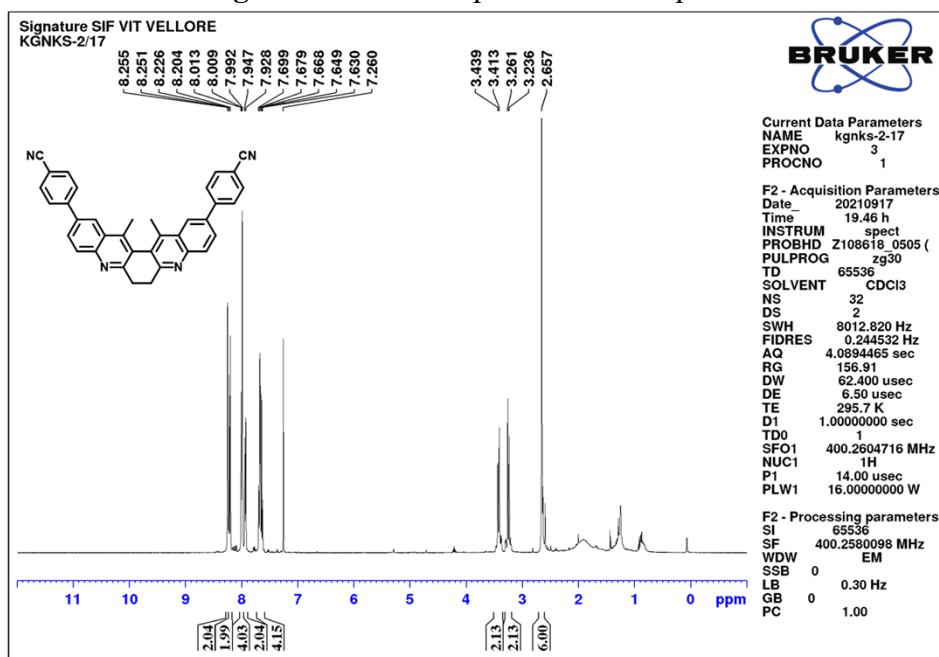SI Figure. 46:  $^1\text{H}$  NMR spectrum of compound 6c

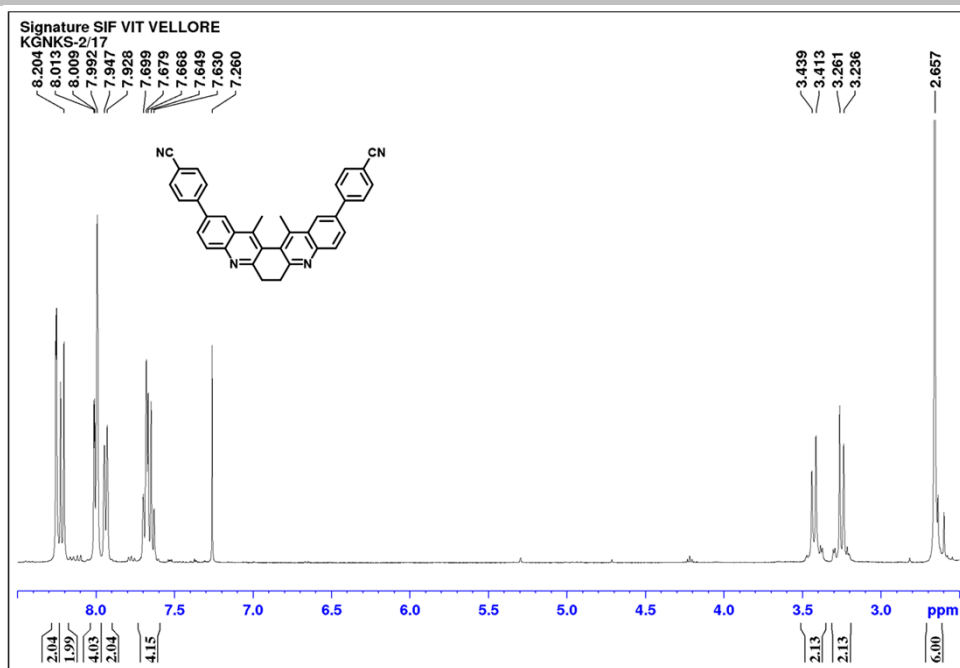SI Figure. 47: Expansion of  $^1\text{H}$  NMR spectrum of compound 6c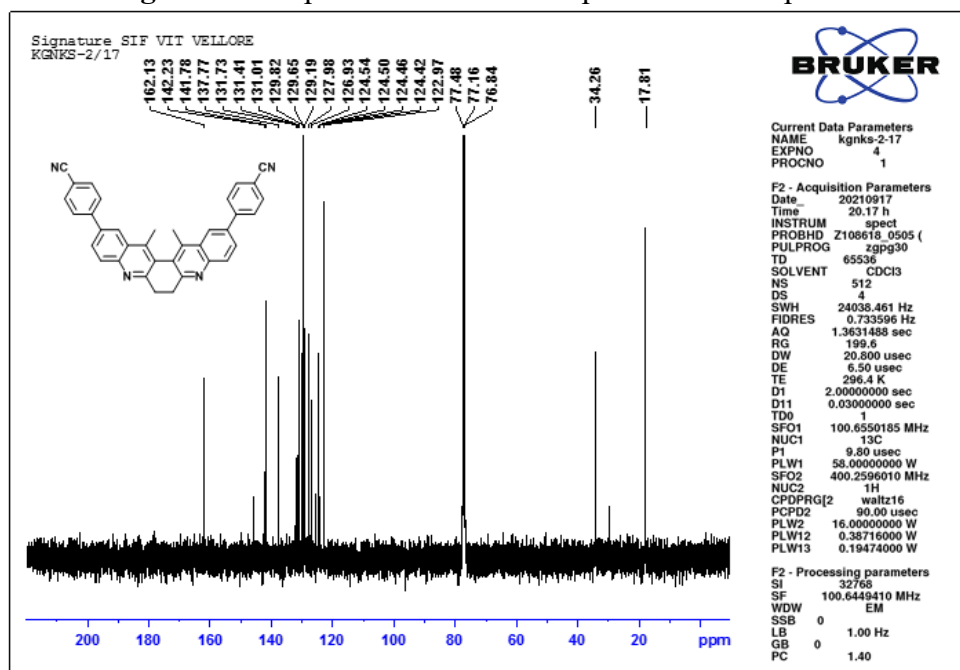SI Figure. 48:  $^{13}\text{C}$  NMR spectrum of compound 6c

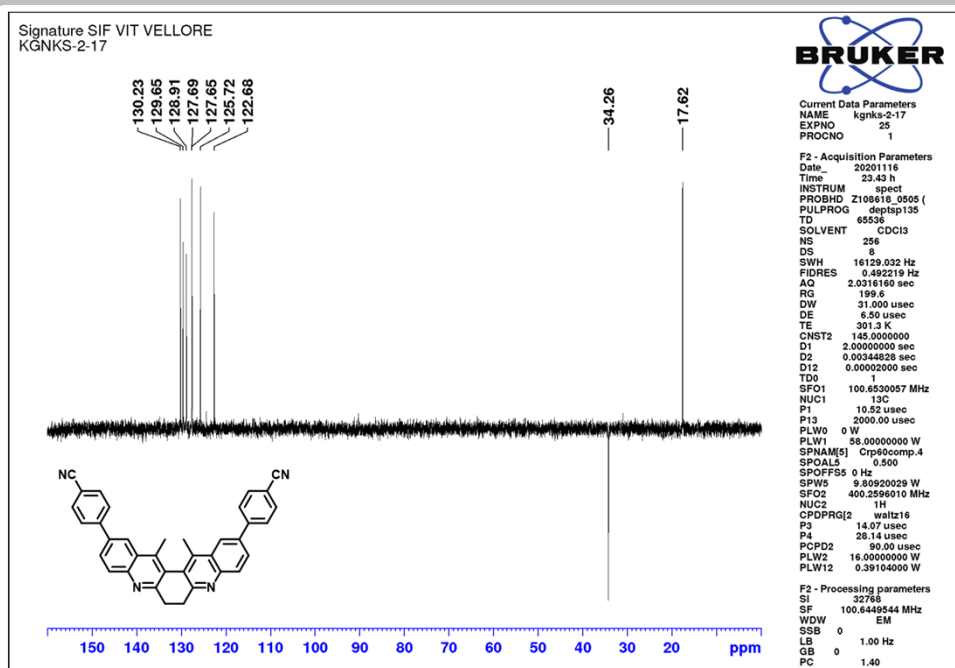

SI Figure. 49: DEPT-135 spectrum of compound 6c

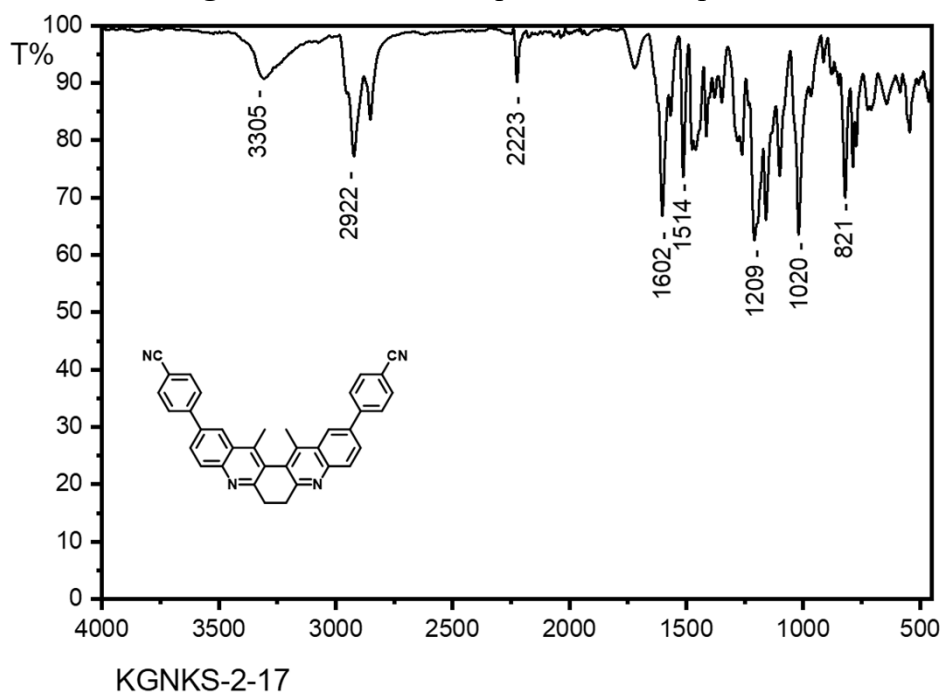

SI Figure. 50: FTIR spectrum of compound 6c

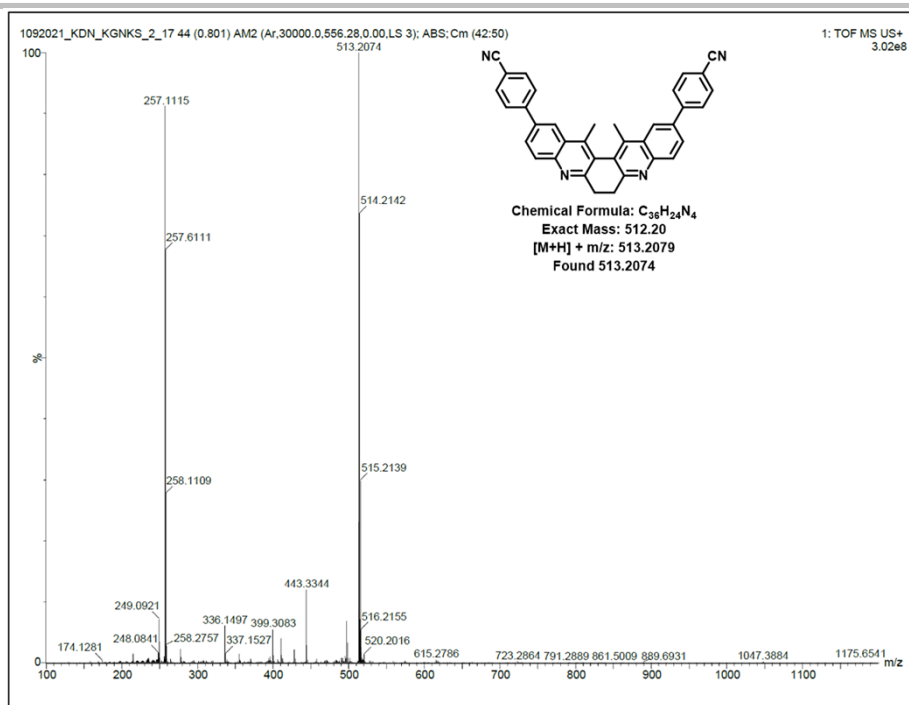

SI Figure. 51: HRMS spectrum of compound 6c

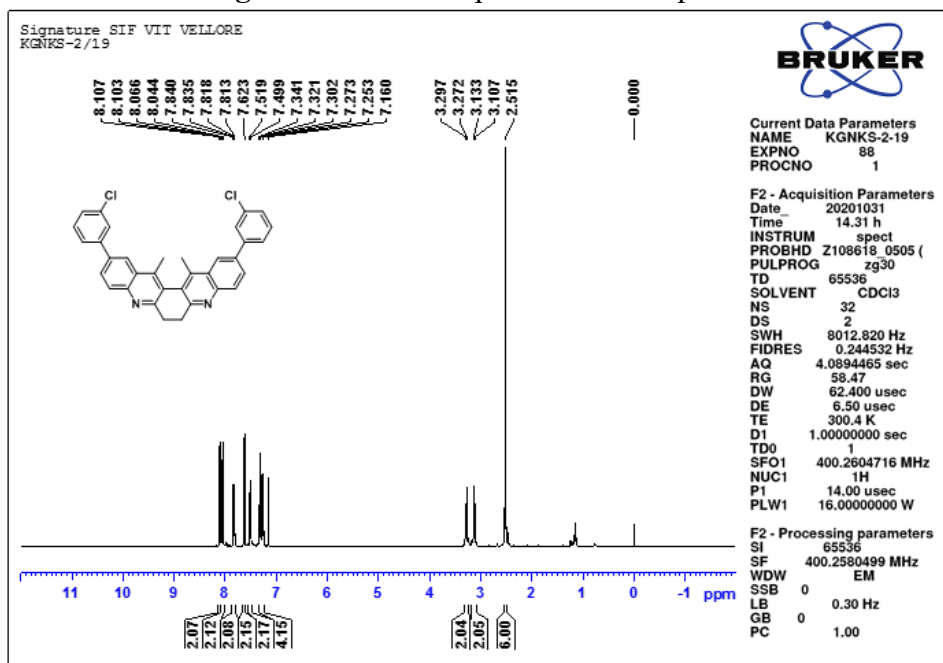SI Figure. 52:  $^1\text{H}$  NMR spectrum of compound 6d



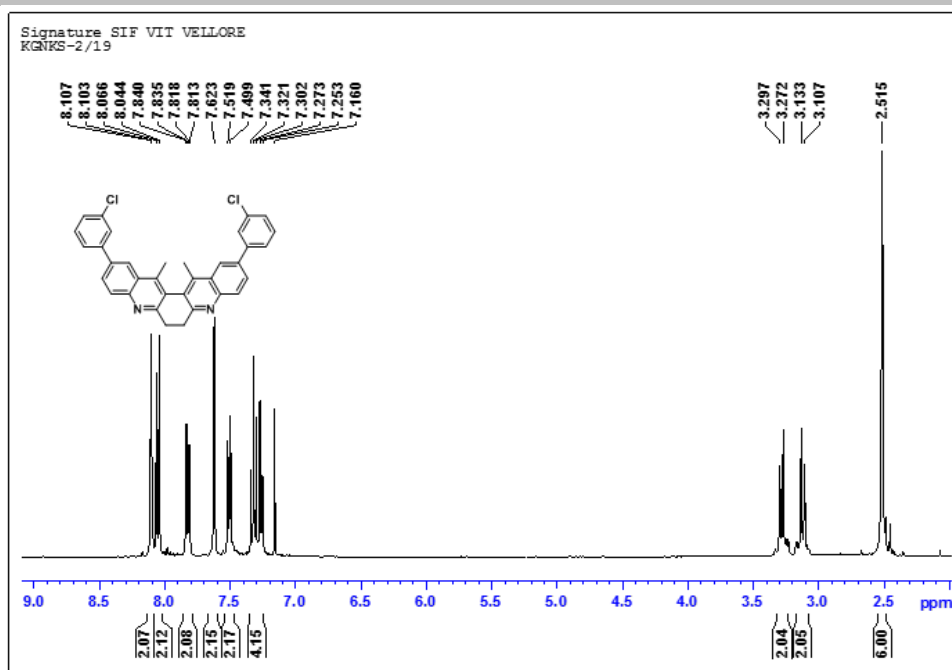SI Figure. 53: Expansion of  $^1\text{H}$  NMR spectrum of compound 6d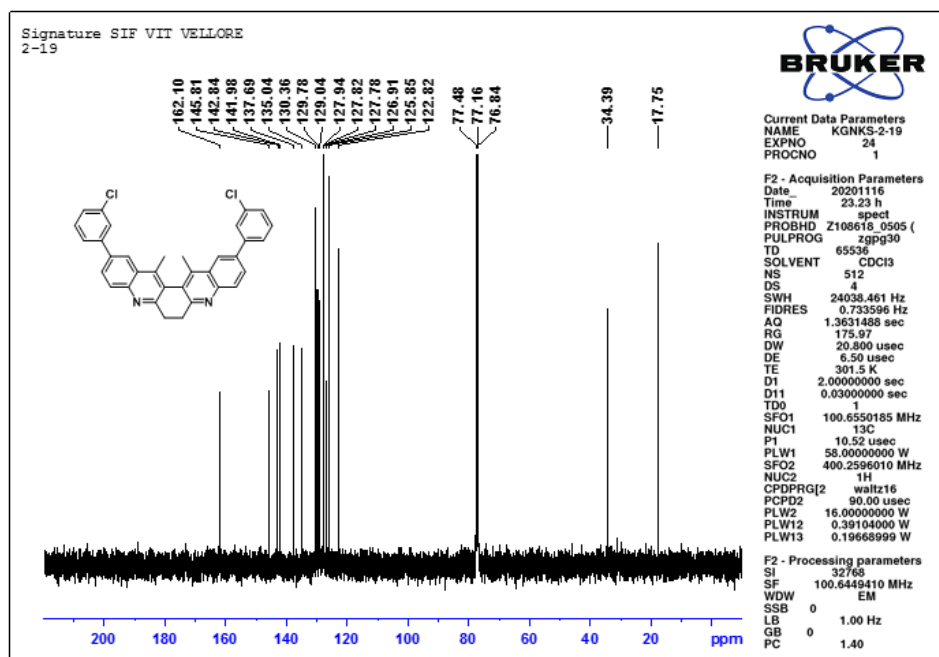SI Figure. 54:  $^{13}\text{C}$  NMR spectrum of compound 6d

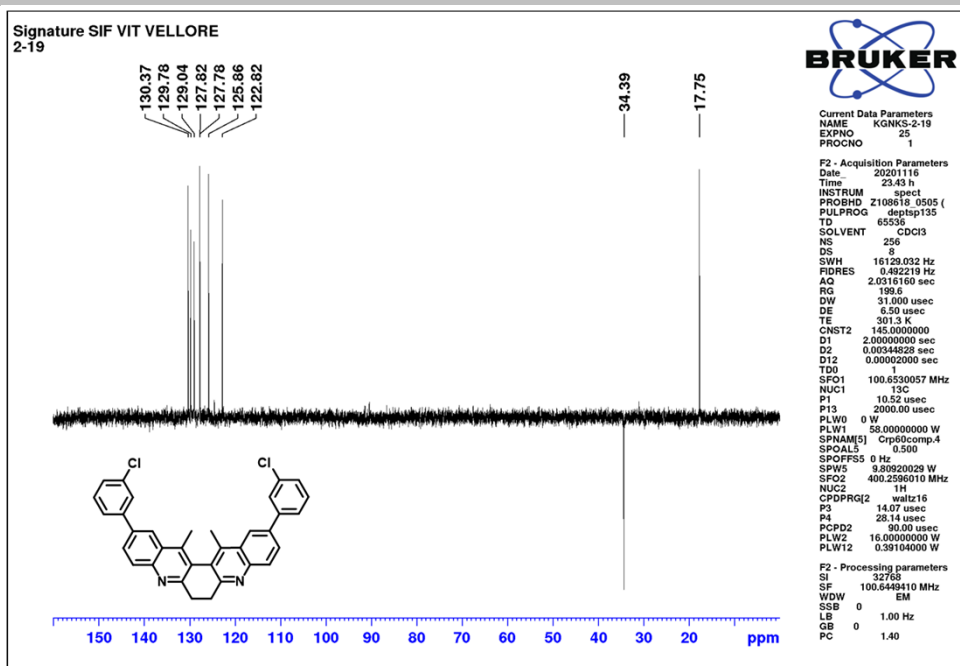

SI Figure. 55: DEPT-135 spectrum of compound 6d

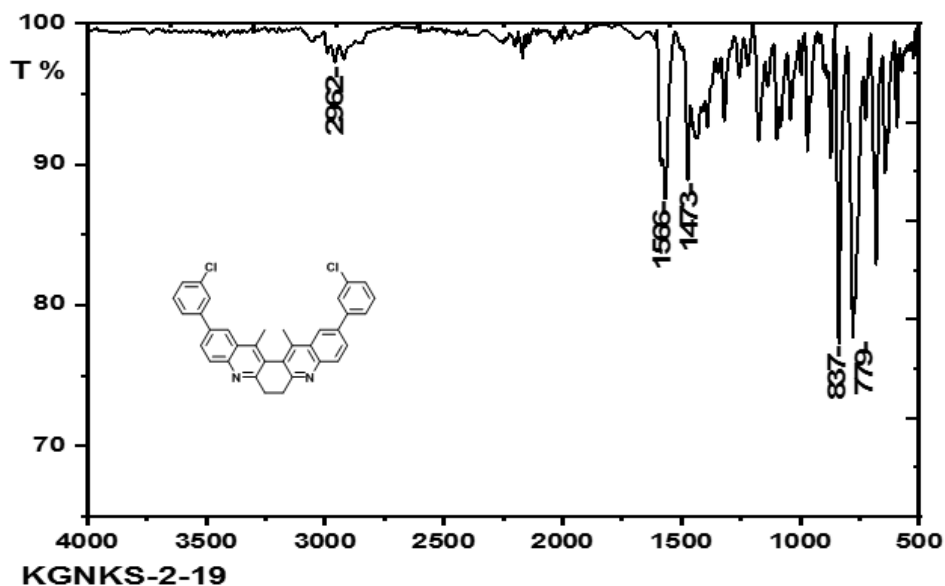

SI Figure. 56: FTIR spectrum of compound 6d

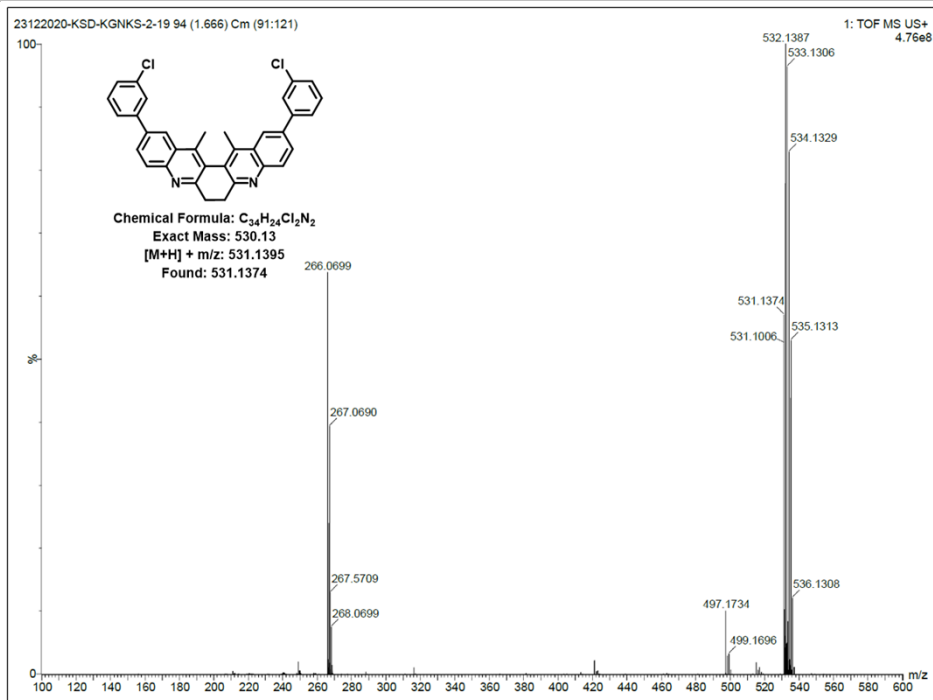

SI Figure. 57: HRMS spectrum of compound 6d

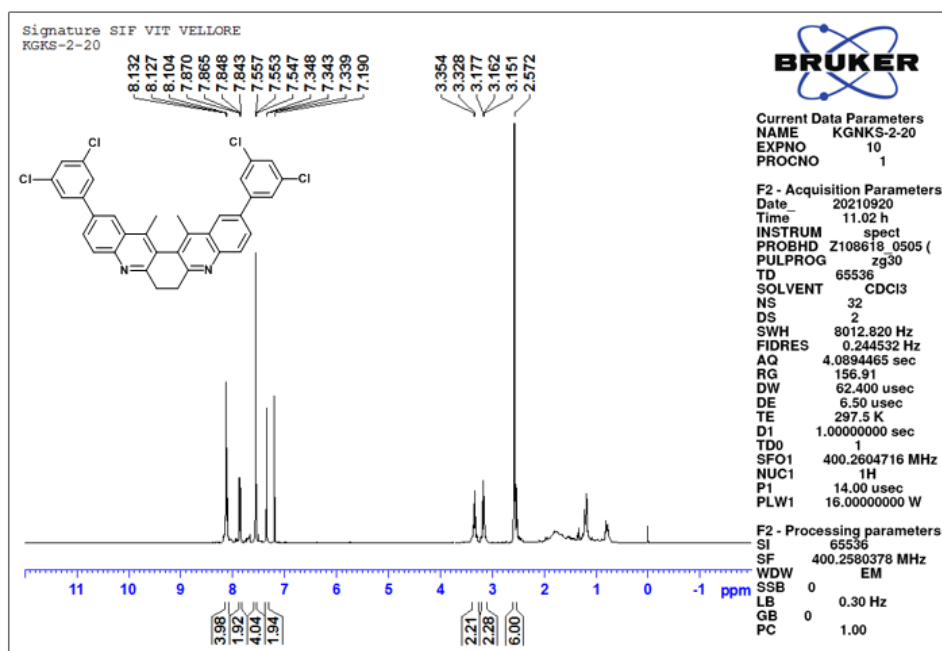SI Figure. 58:  $^1H$  NMR spectrum of compound 6e

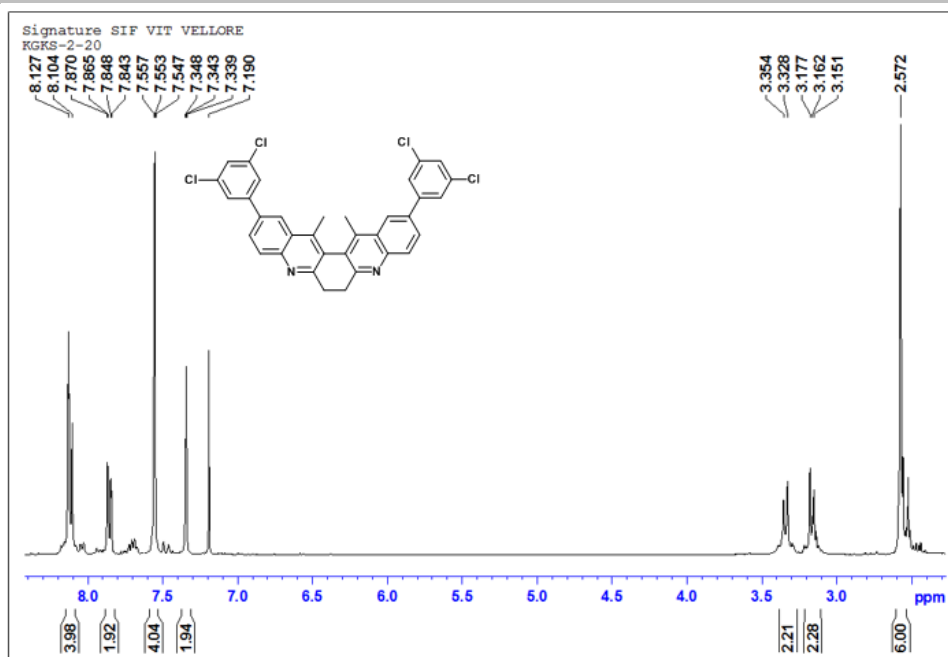SI Figure. 59: Expansion of  $^1\text{H}$  NMR spectrum of compound **6e**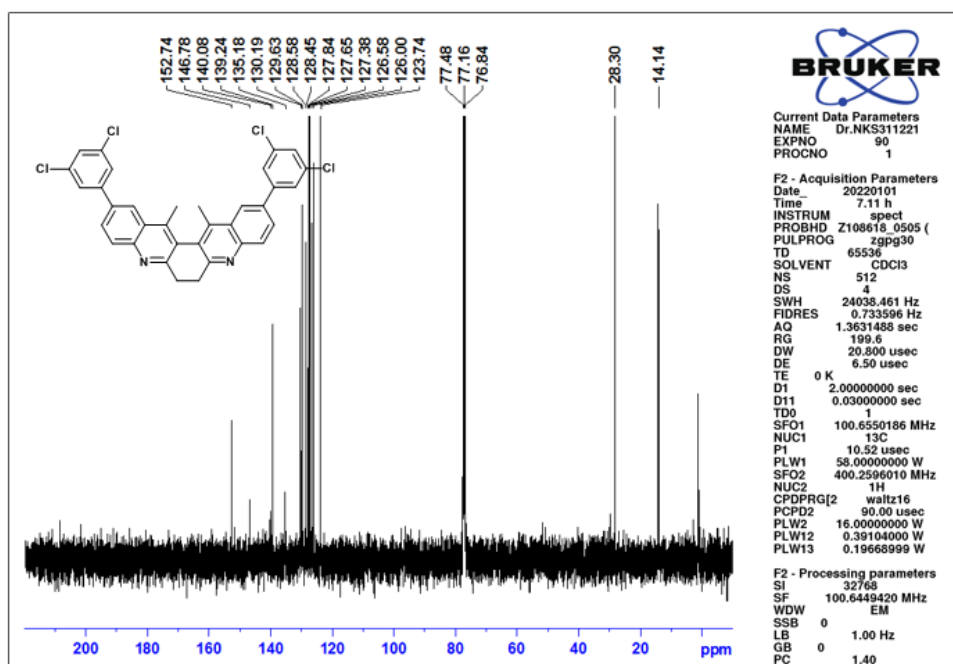SI Figure. 60:  $^{13}\text{C}$  NMR spectrum of compound **6e**

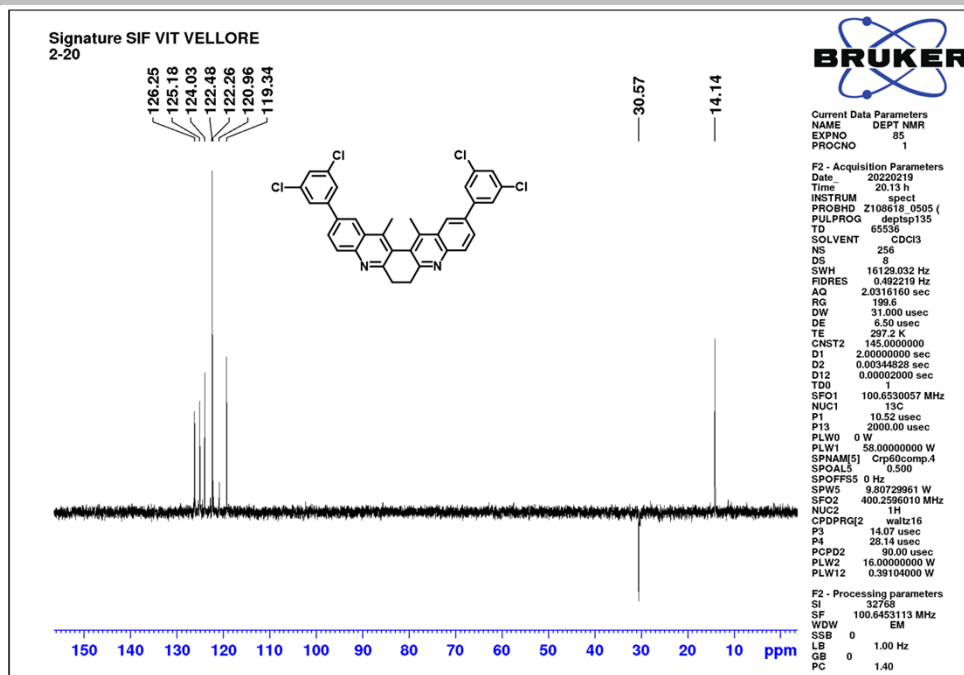SI Figure. 61: DEPT-135 spectrum of compound **6e**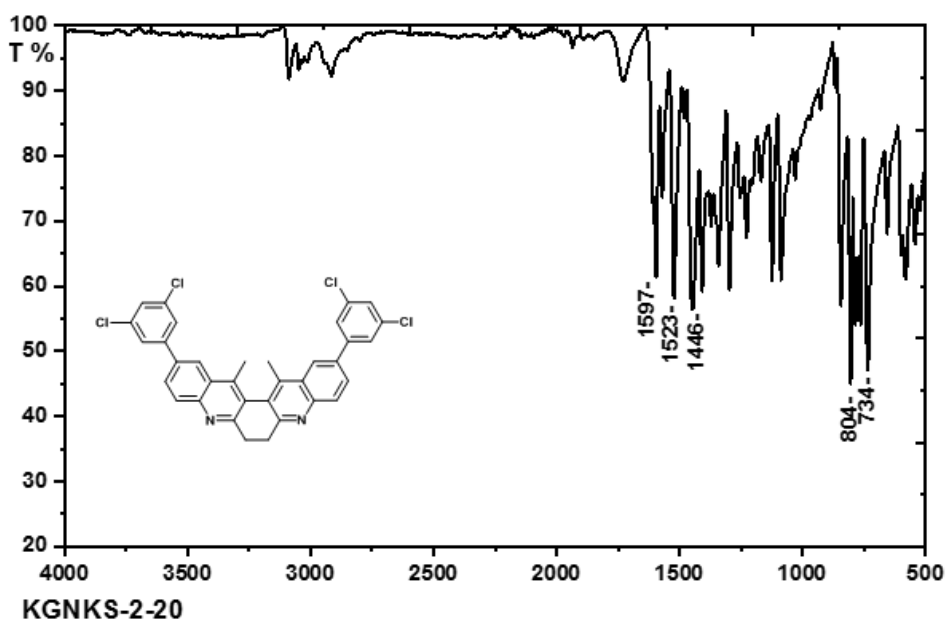SI Figure. 62: FTIR spectrum of compound **6e**

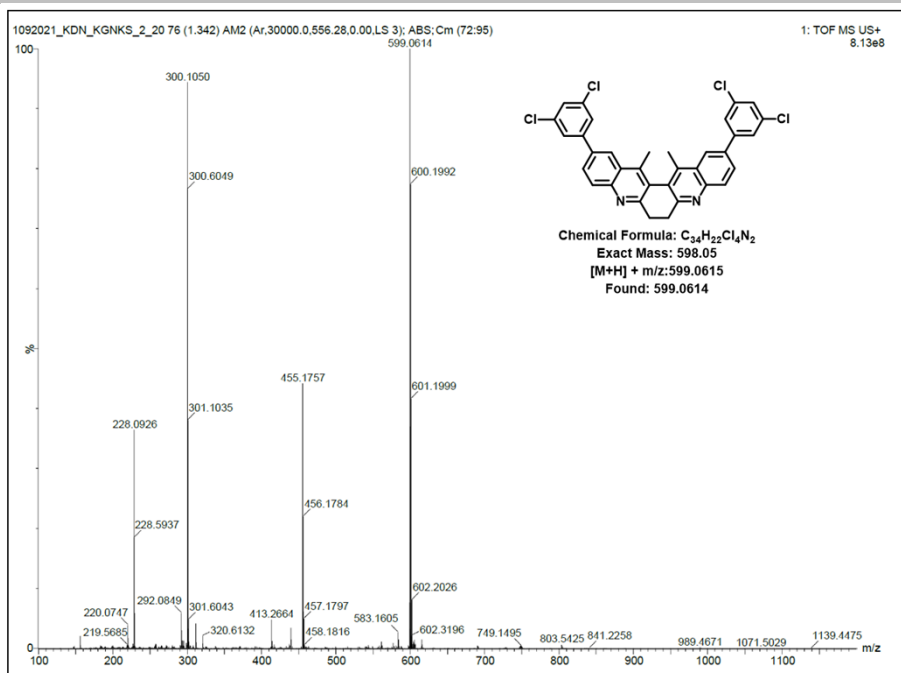

SI Figure. 63: HRMS spectrum of compound 6e

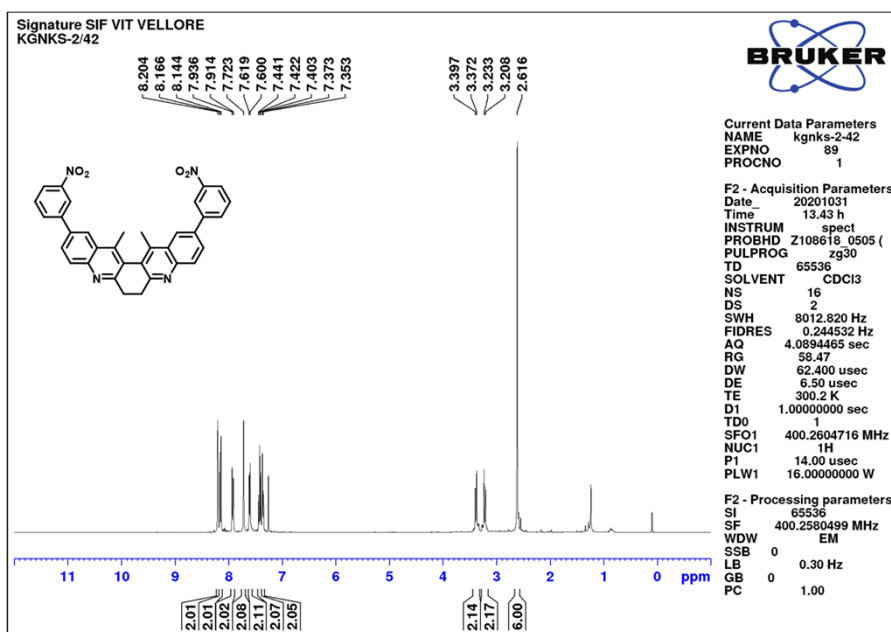SI Figure. 64:  $^1H$  NMR spectrum of compound 6f

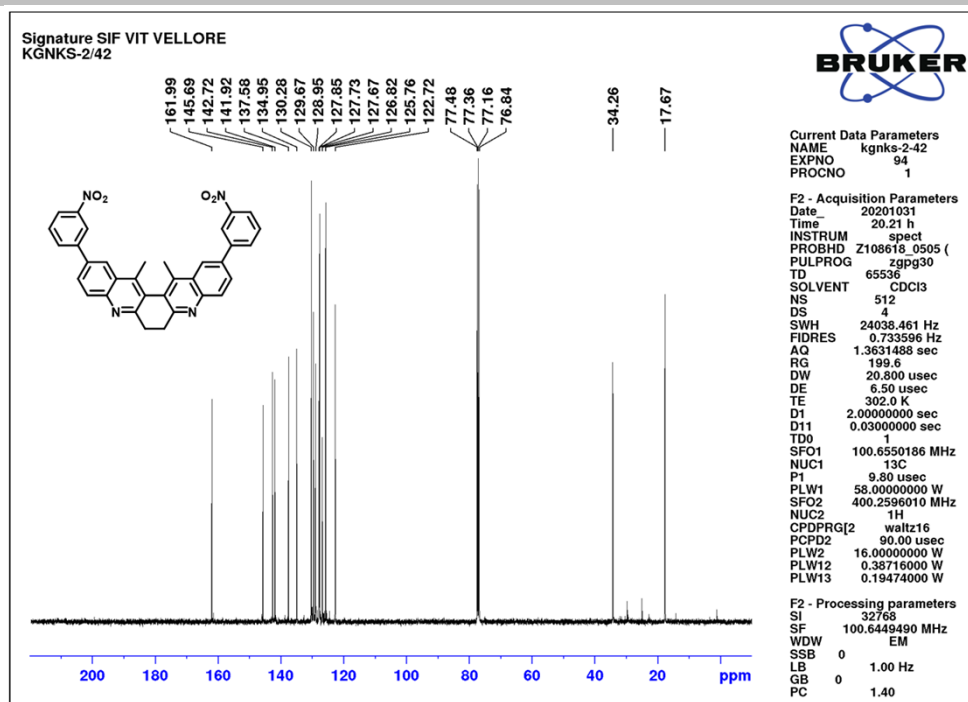SI Figure. 65:  $^{13}\text{C}$  NMR spectrum of compound 6f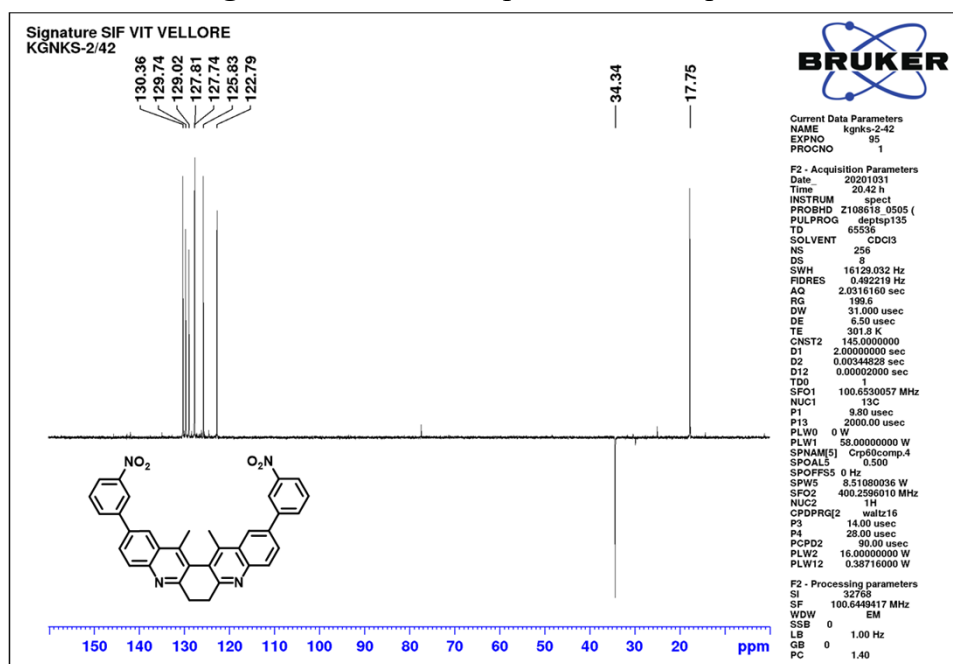

SI Figure. 66: DEPT-135 spectrum of compound 6f

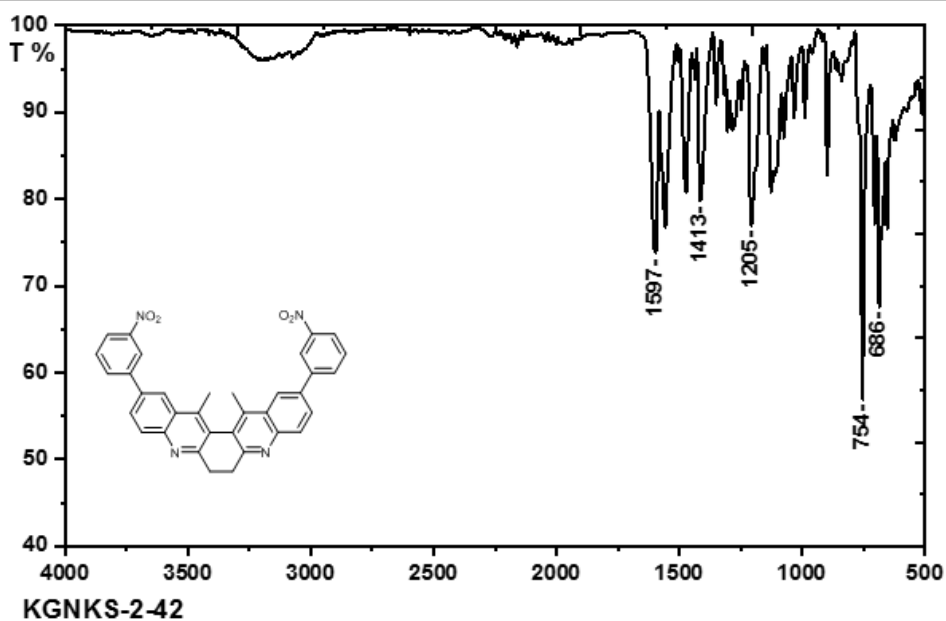

SI Figure. 67: FTIR spectrum of compound 6f

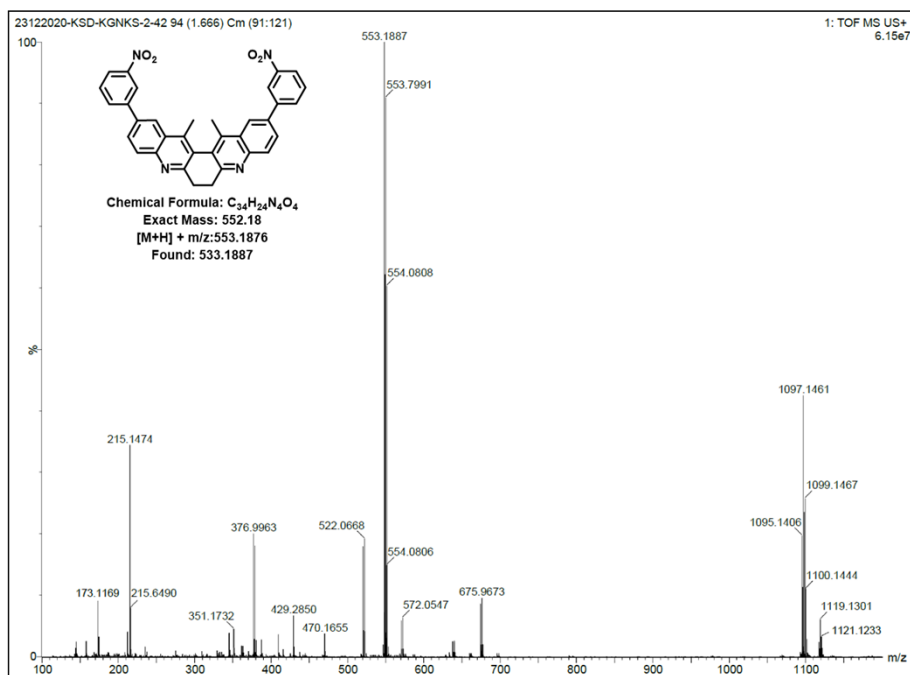

SI Figure. 68: HRMS spectrum of compound 6f



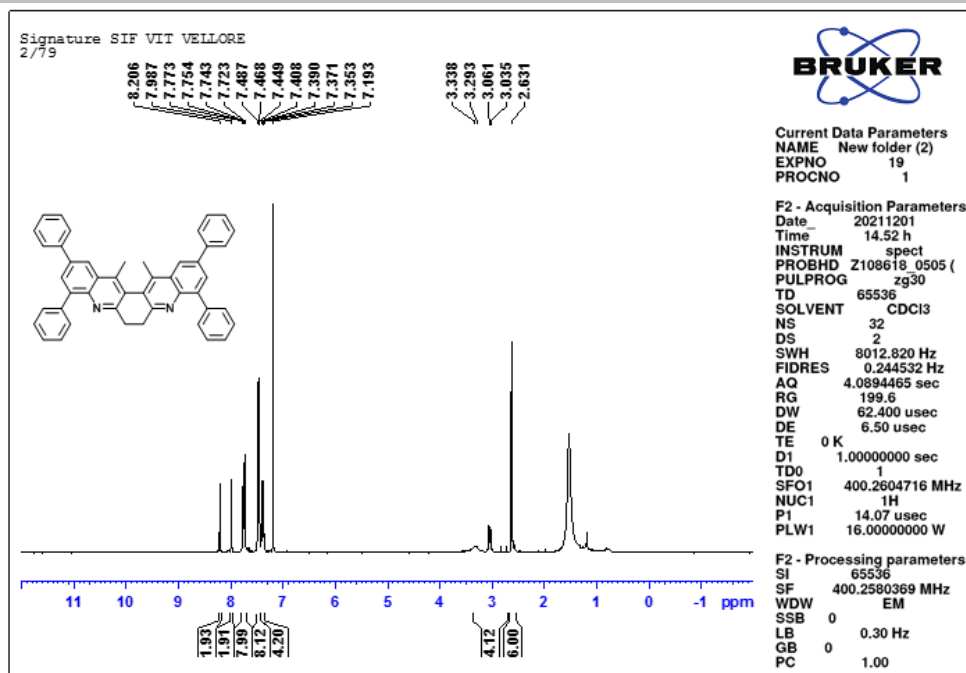SI Figure. 69:  $^1\text{H}$  NMR spectrum of compound **6g**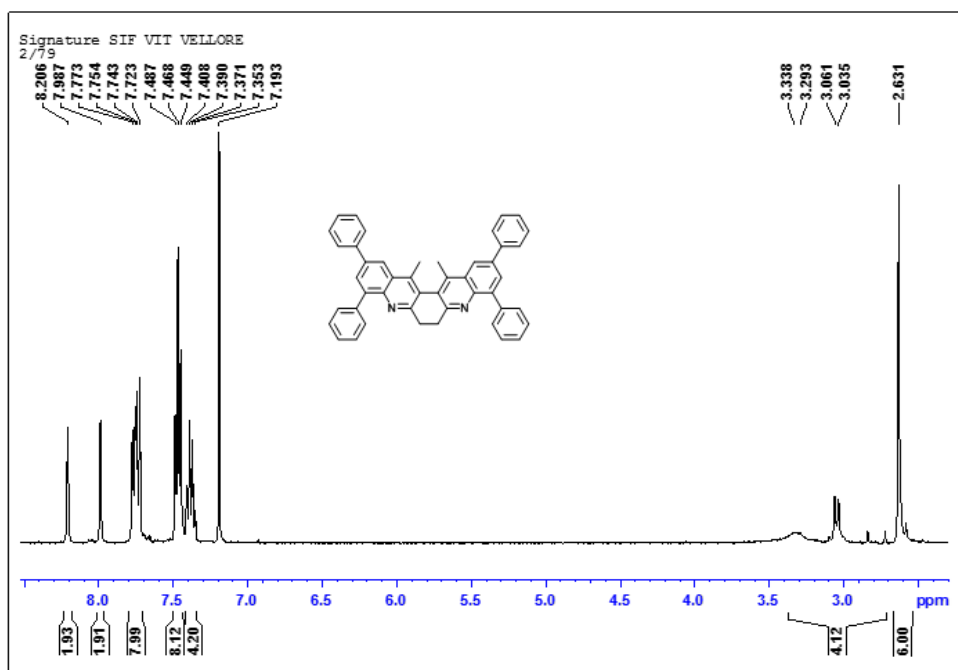SI Figure. 70: Expansion of  $^1\text{H}$  NMR spectrum of compound **6g**

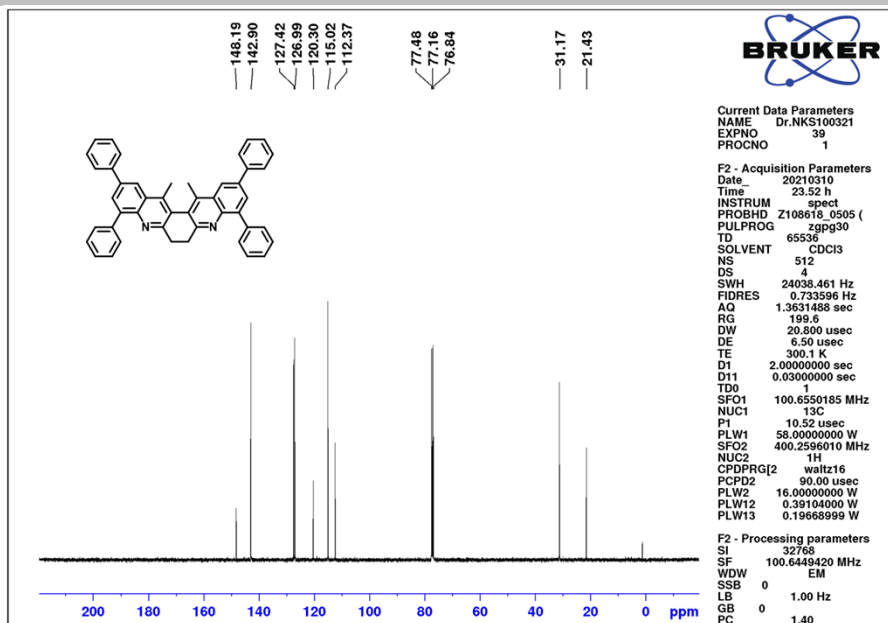SI Figure. 71:  $^{13}\text{C}$  NMR spectrum of compound **6g**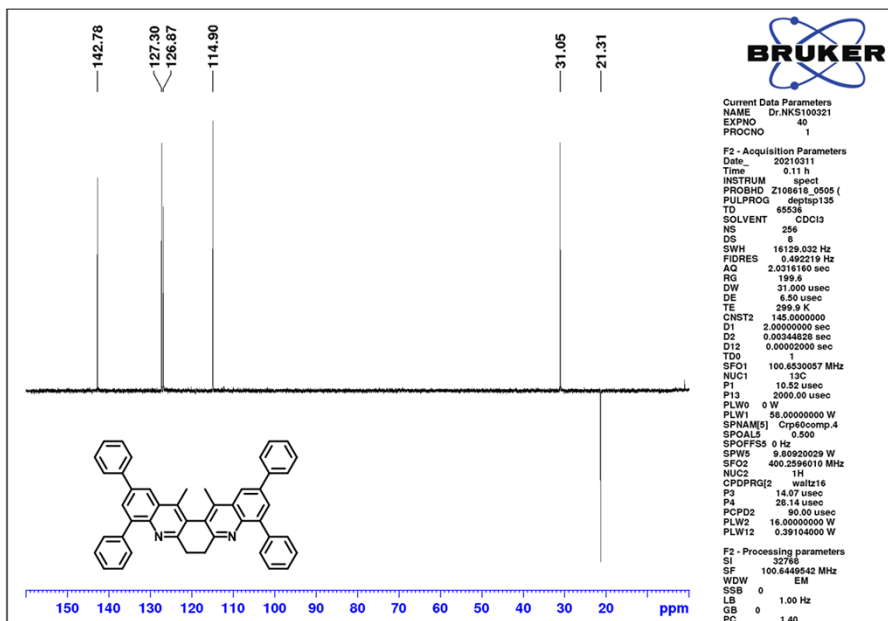SI Figure. 72: DEPT-135 spectrum of compound **6g**

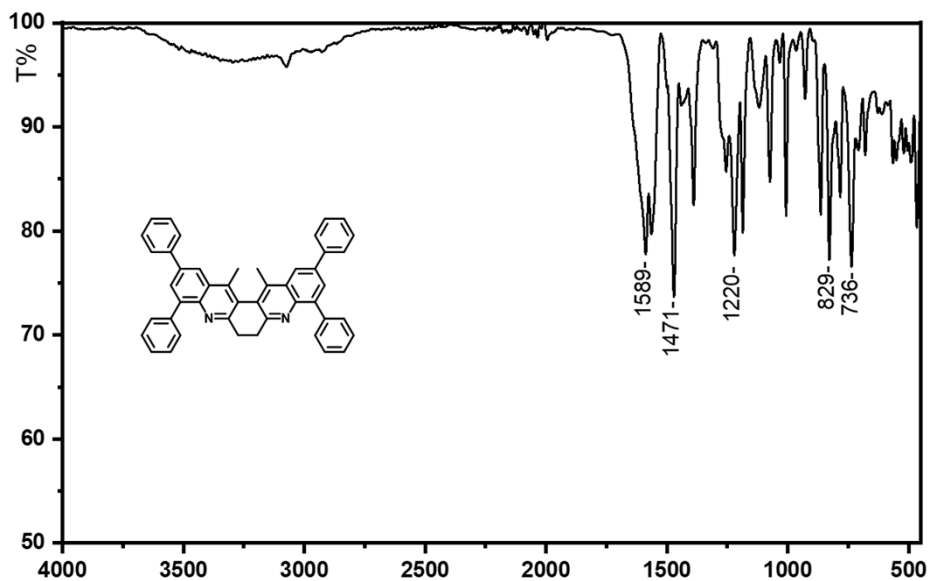

KGNKS-2-79

SI Figure. 73: FTIR spectrum of compound 6g

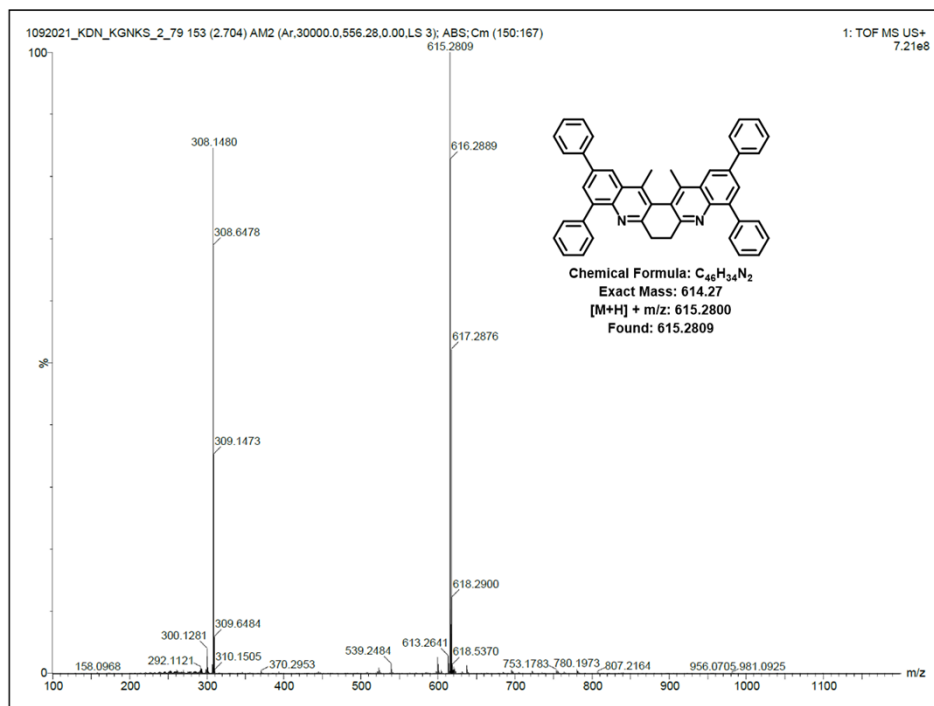

SI Figure. 74: HRMS spectrum of compound 6g

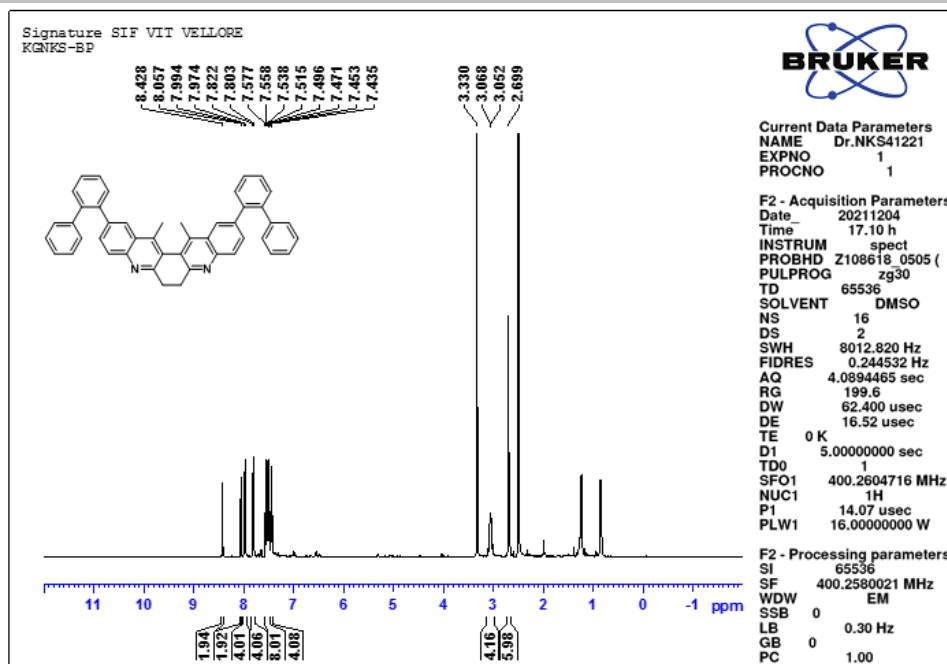SI Figure. 75:  $^1\text{H}$  NMR spectrum of compound 6h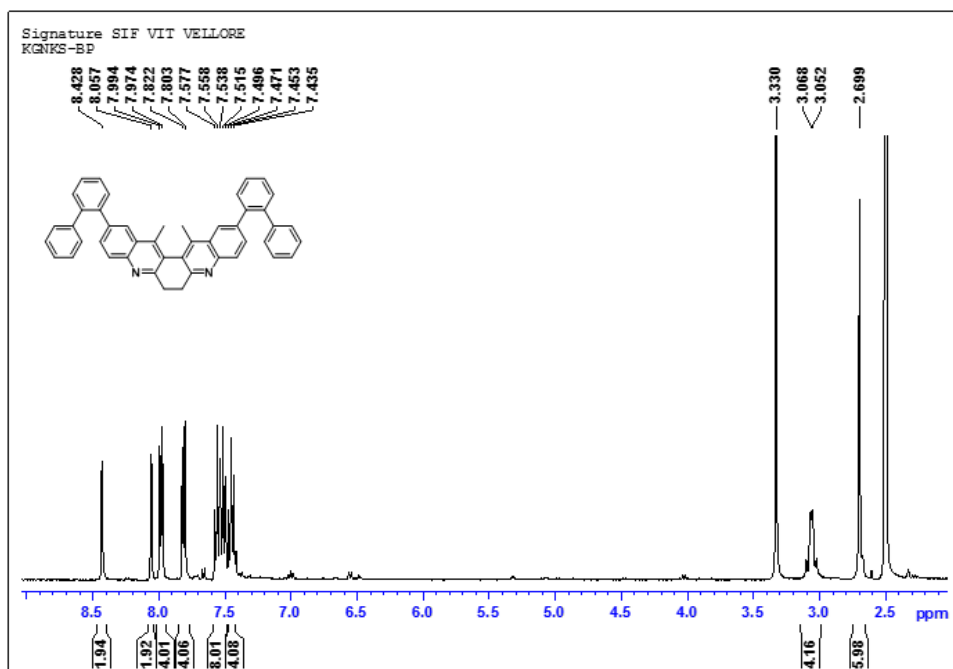SI Figure. 76: Expansion of  $^1\text{H}$  NMR spectrum of compound 6h

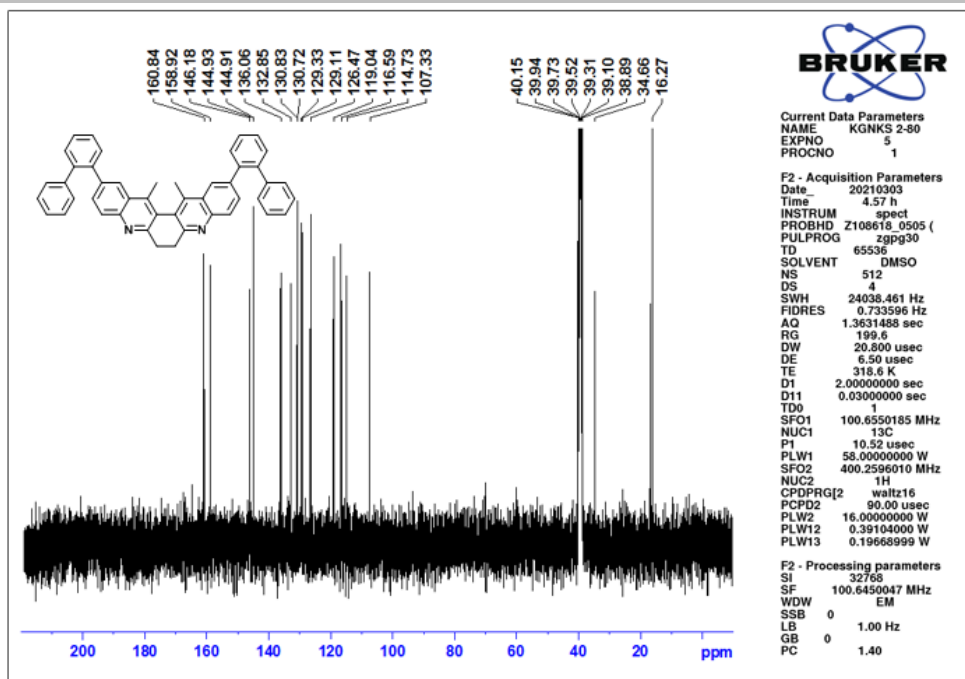SI Figure. 77:  $^{13}\text{C}$  NMR spectrum of compound 6h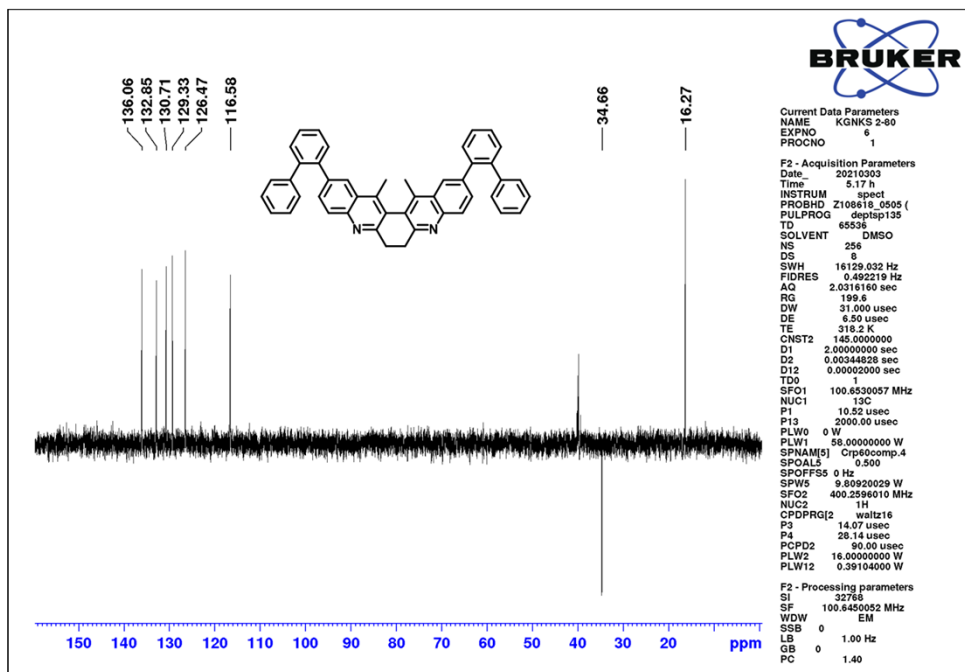

SI Figure. 78: DEPT-135 spectrum of compound 6h

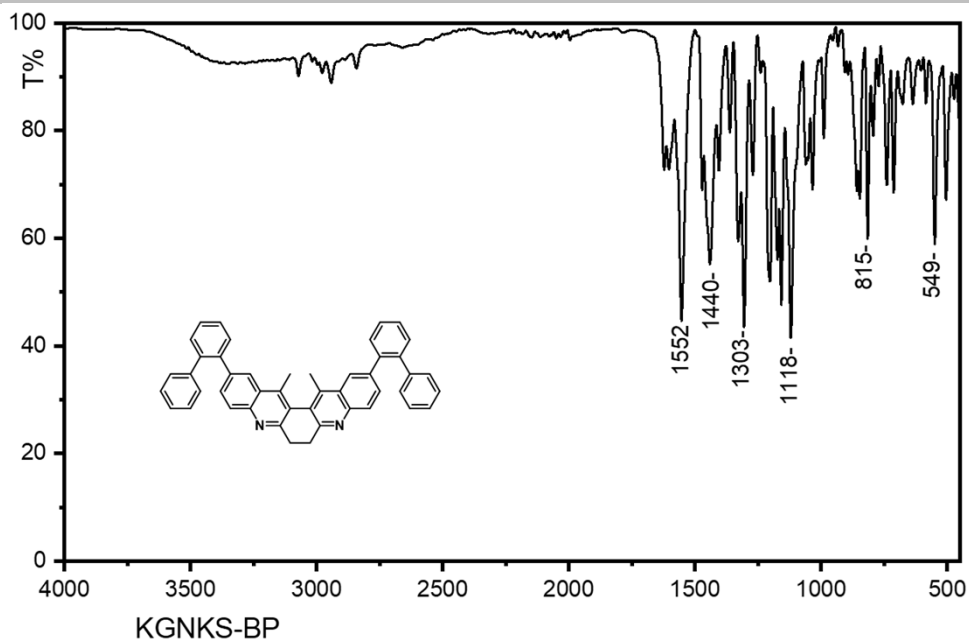

SI Figure. 79: FTIR spectrum of compound 6h

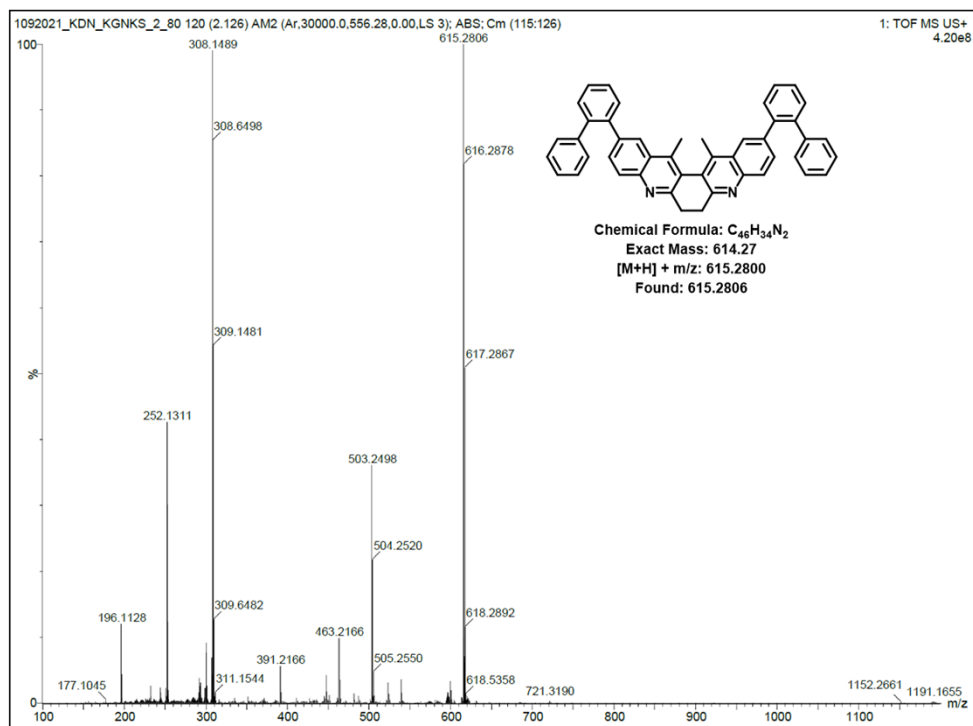

SI Figure. 80: HRMS spectrum of compound 6h

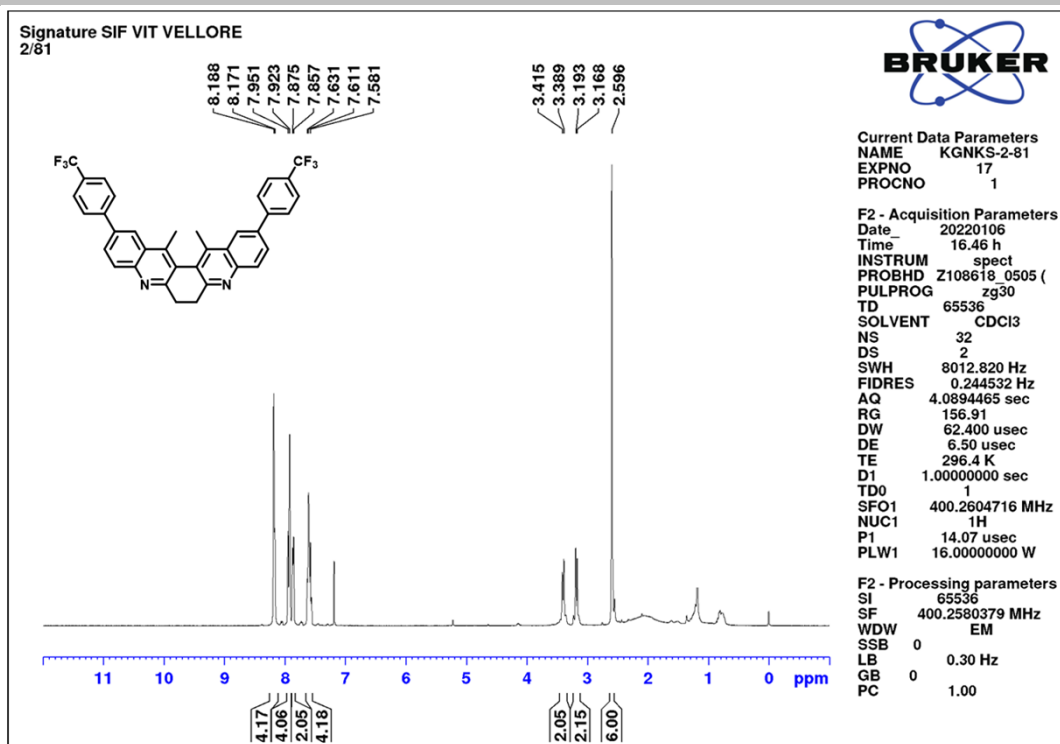SI Figure. 81:  $^1\text{H}$  NMR spectrum of compound **6i**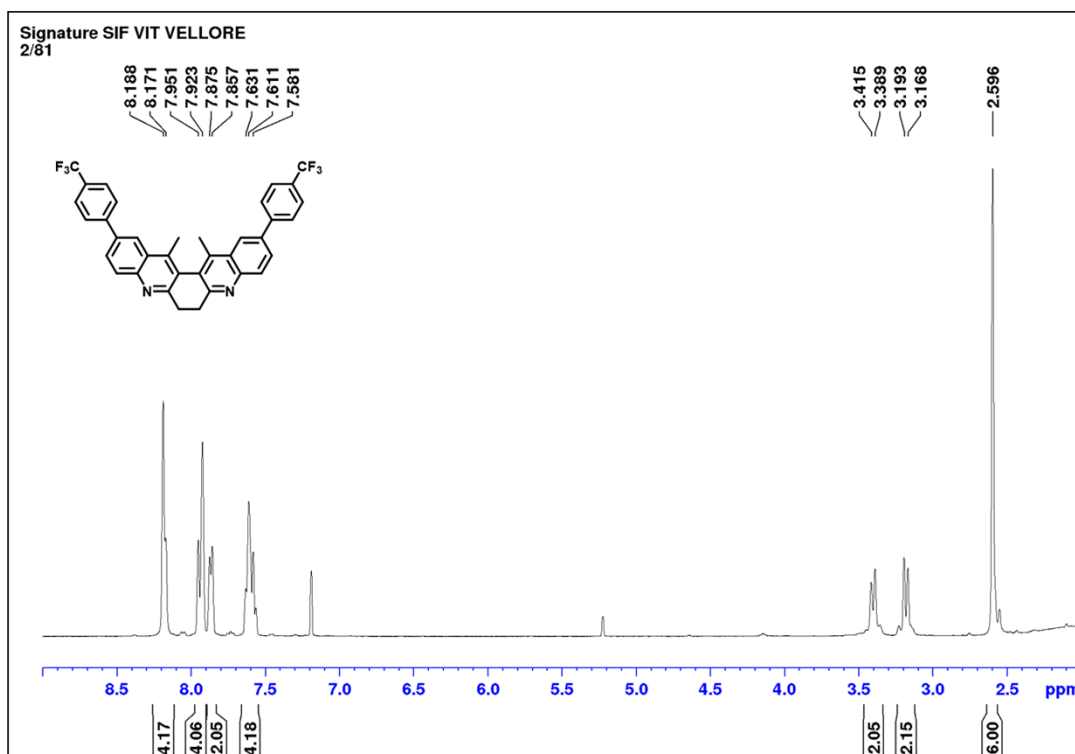SI Figure. 82: Expansion of  $^1\text{H}$  NMR spectrum of compound **6i**

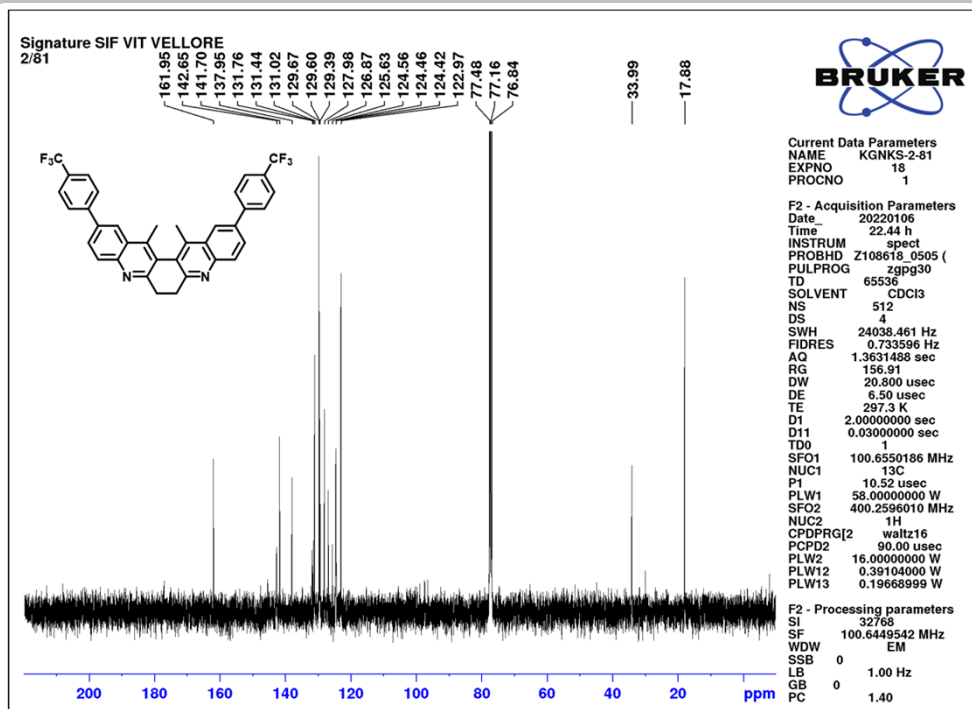

SI Figure. 83:  $^{13}\text{C}$  NMR spectrum of compound **6i**

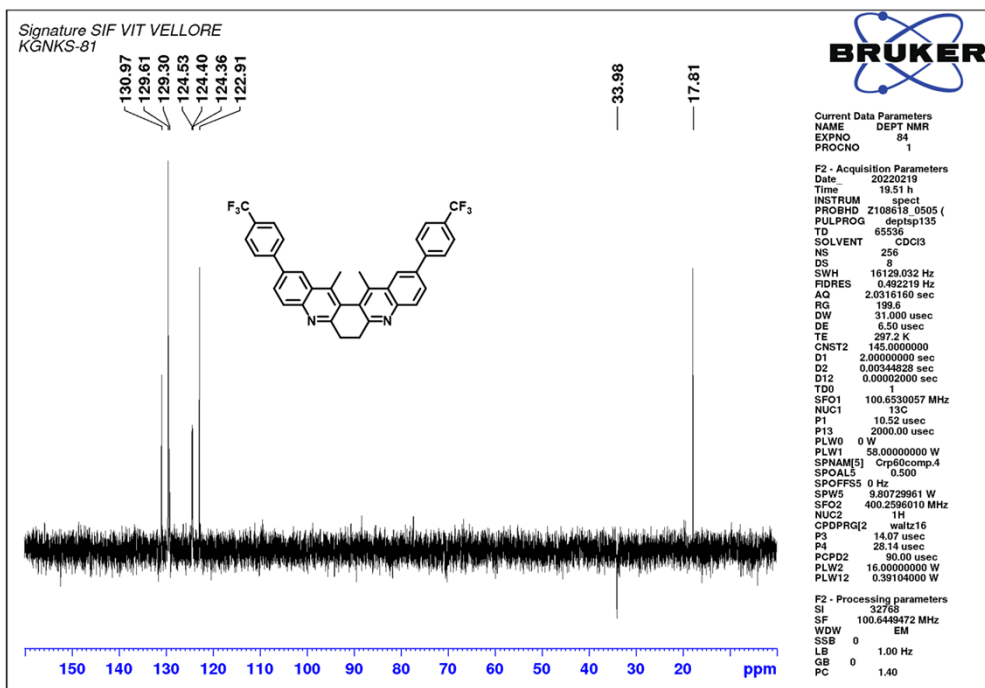

SI Figure. 84: DEPT-135 spectrum of compound **6i**



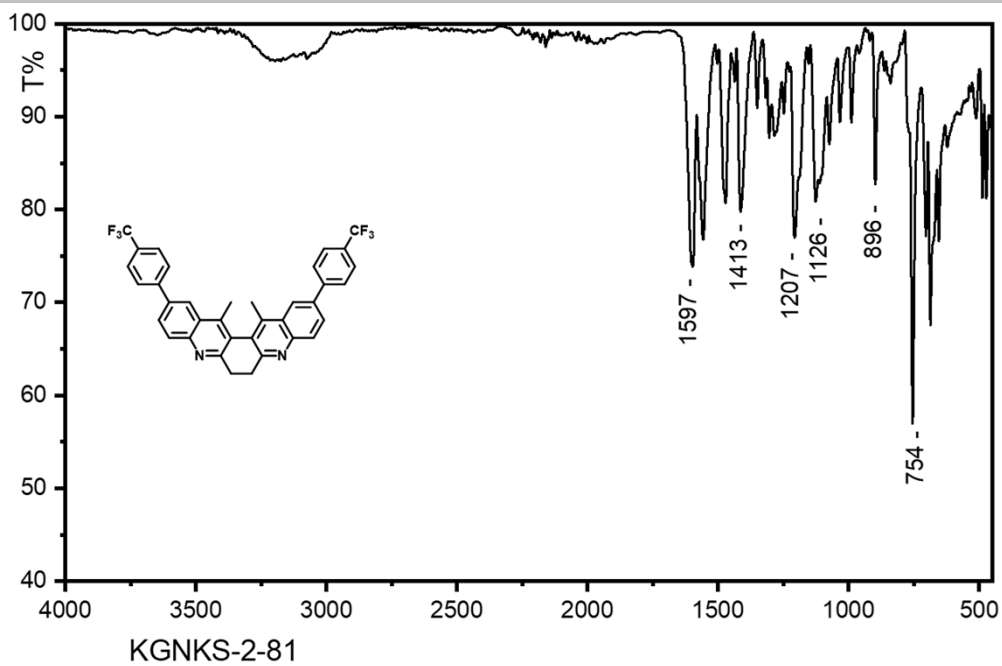SI Figure. 85: FTIR spectrum of compound **6i**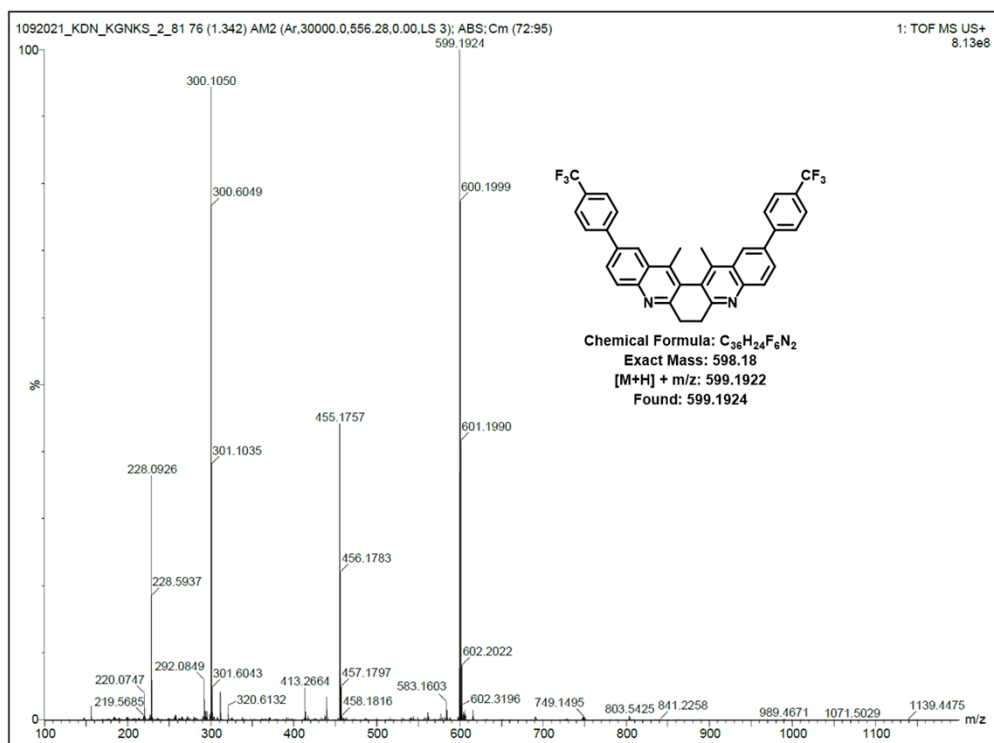SI Figure. 86: HRMS spectrum of compound **6i**

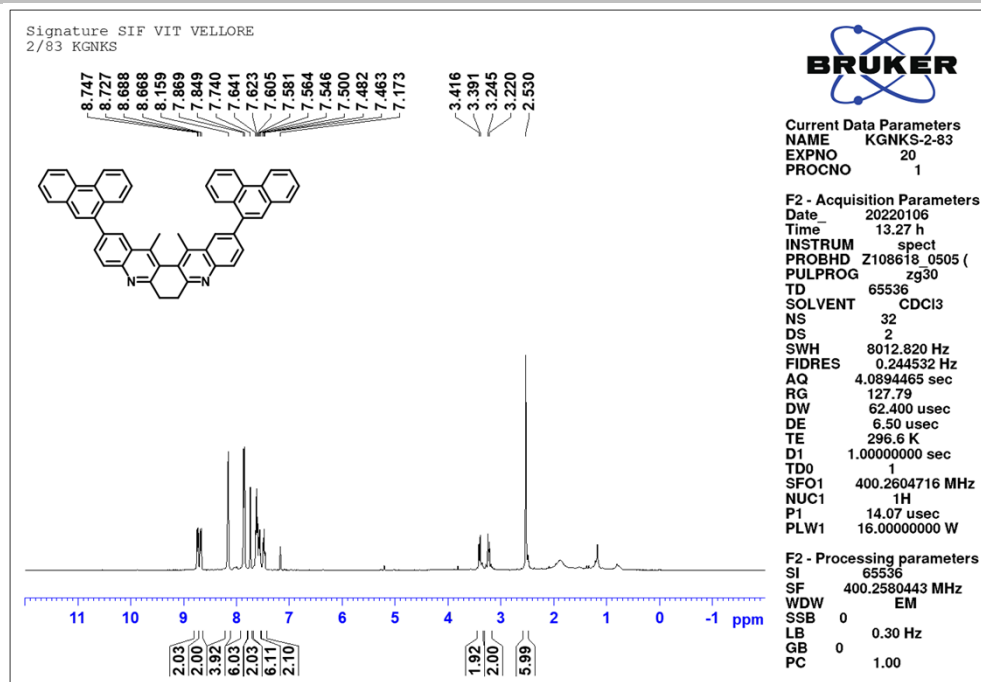SI Figure. 87:  $^1\text{H}$  NMR spectrum of compound 6j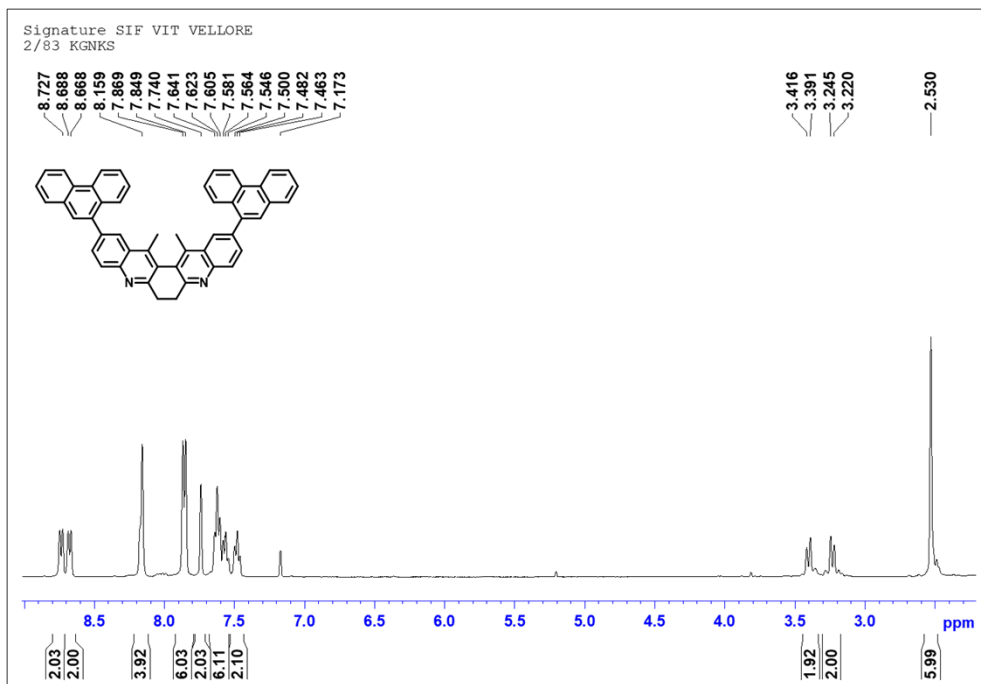SI Figure. 88: Expansion of  $^1\text{H}$  NMR spectrum of compound 6j

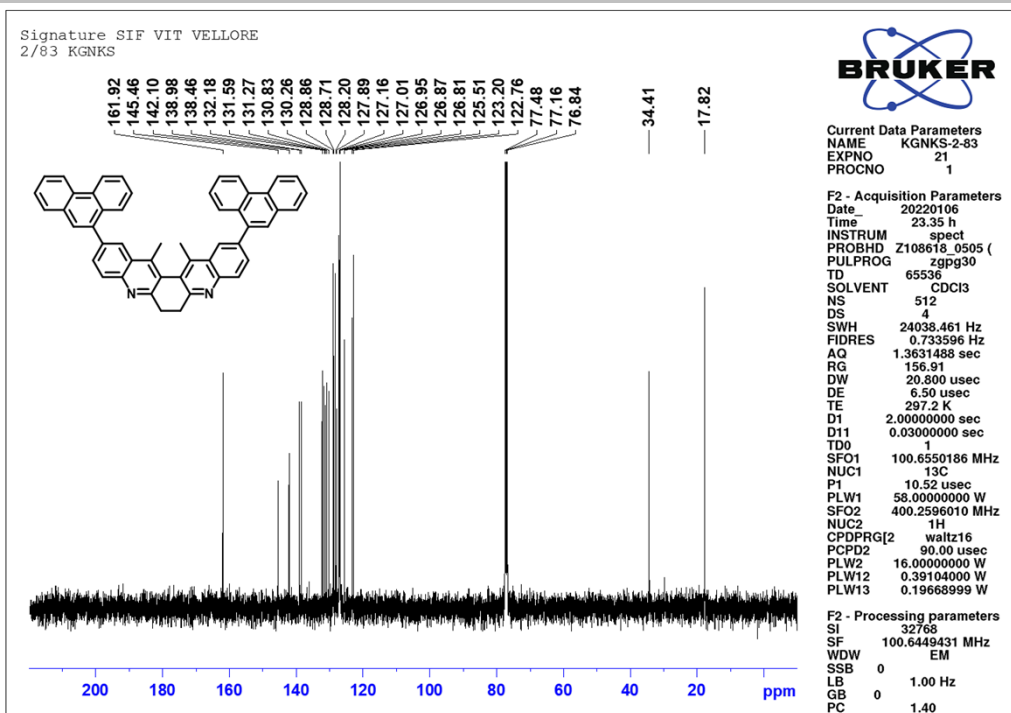

SI Figure. 89:  $^{13}\text{C}$  NMR spectrum of compound **6j**

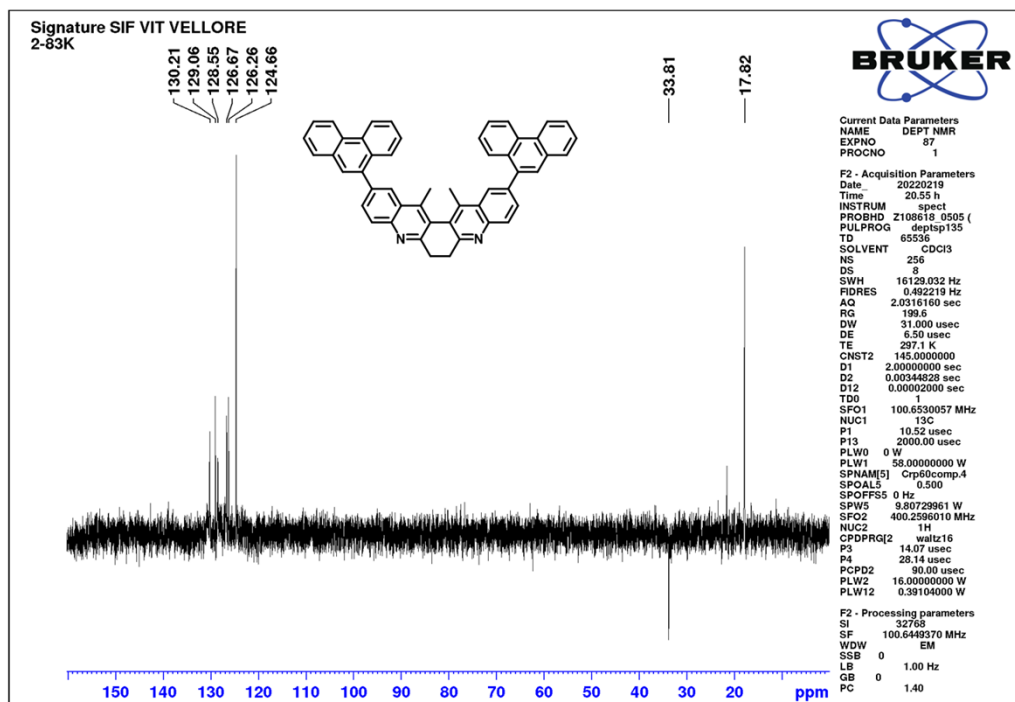

SI Figure. 90: DEPT-135 spectrum of compound **6j**

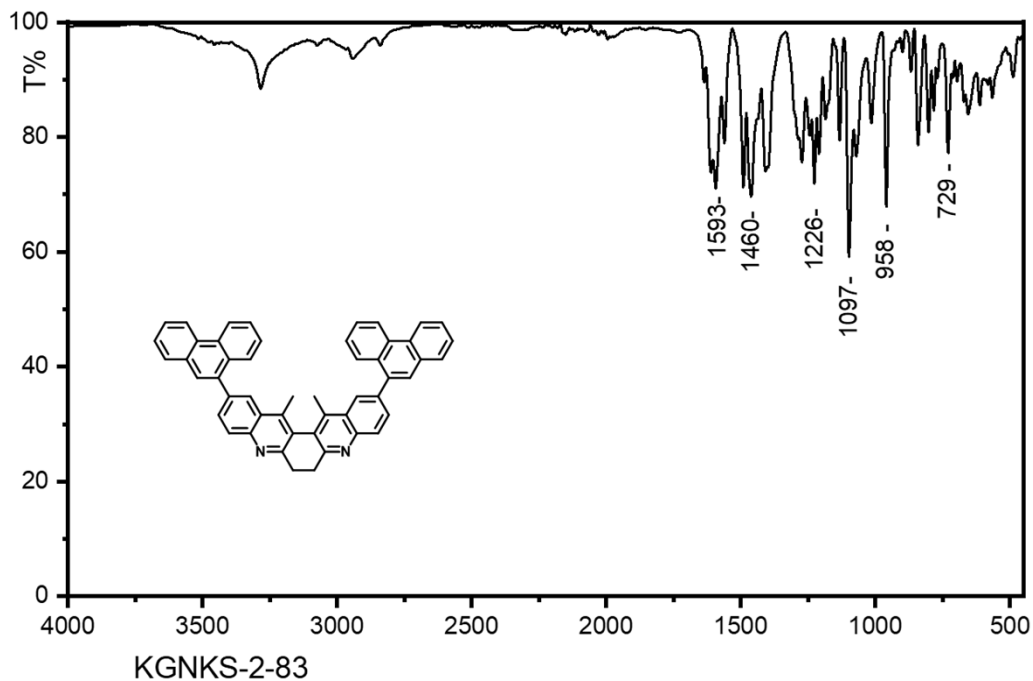

SI Figure. 91: FTIR spectrum of compound 6j

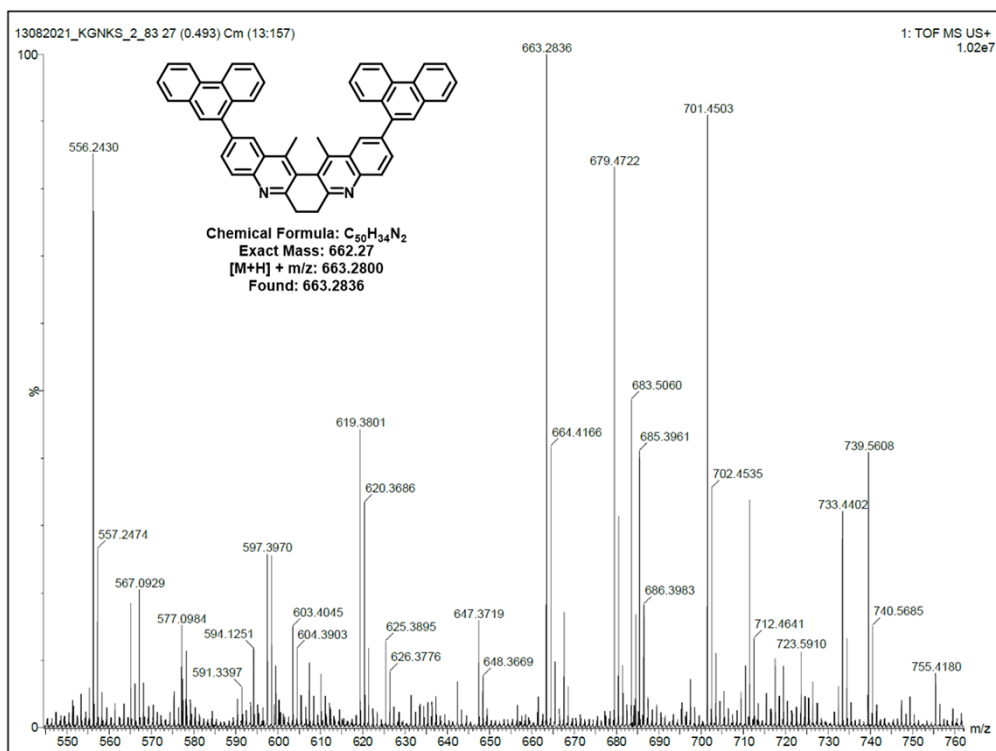

SI Figure. 92: HRMS spectrum of compound 6j

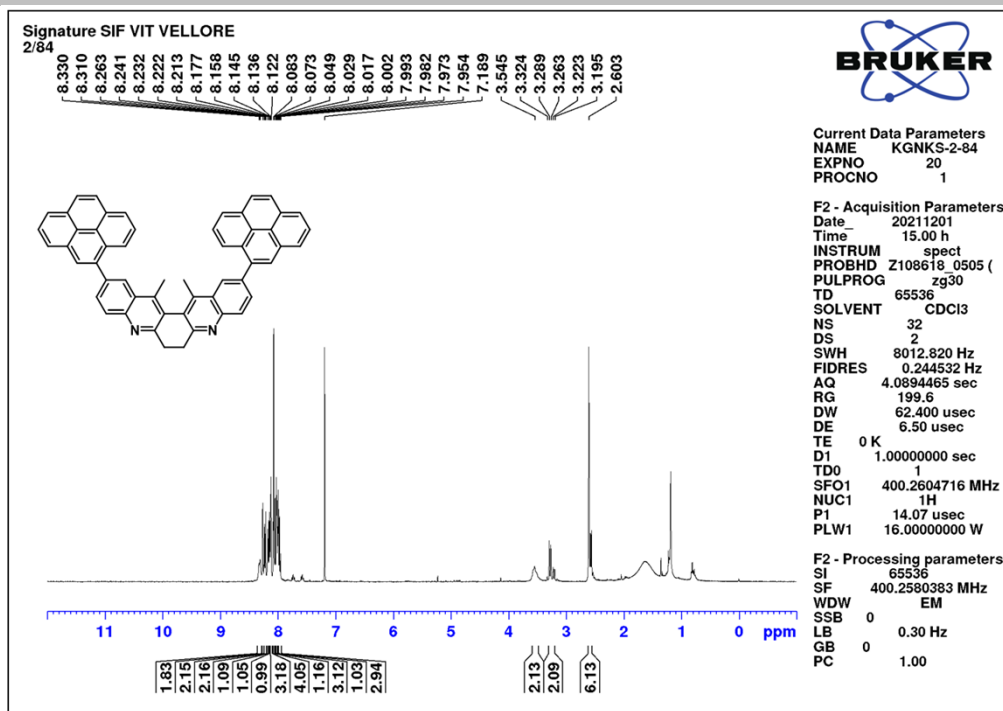SI Figure. 93:  $^1\text{H}$  NMR spectrum of compound **6k**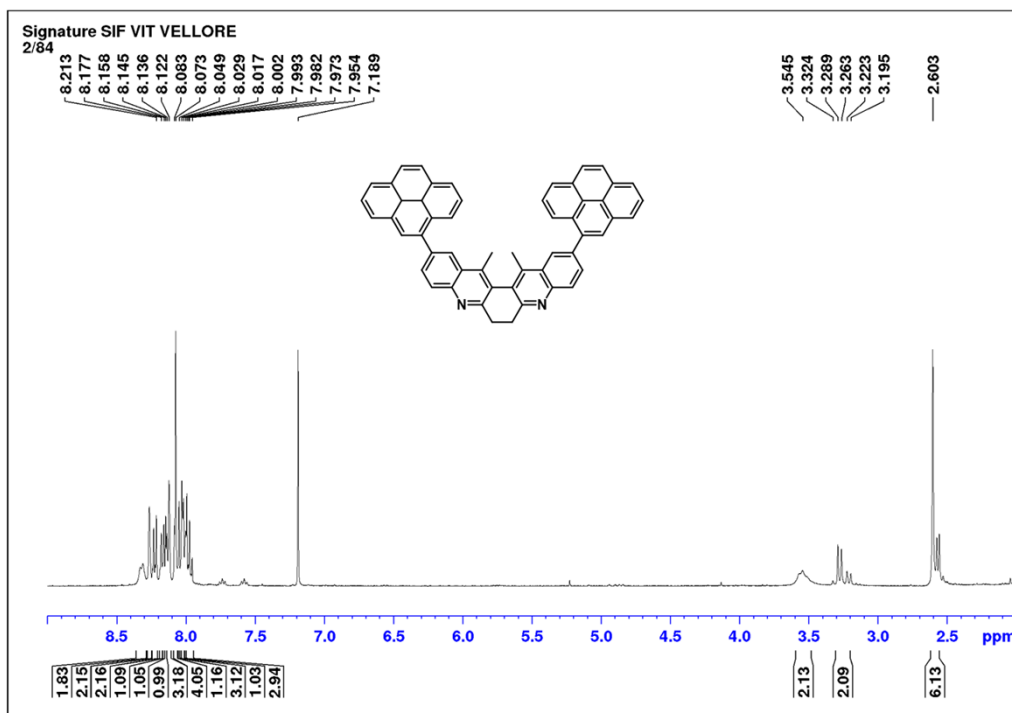SI Figure. 94: Expansion of  $^1\text{H}$  NMR spectrum of compound **6k**

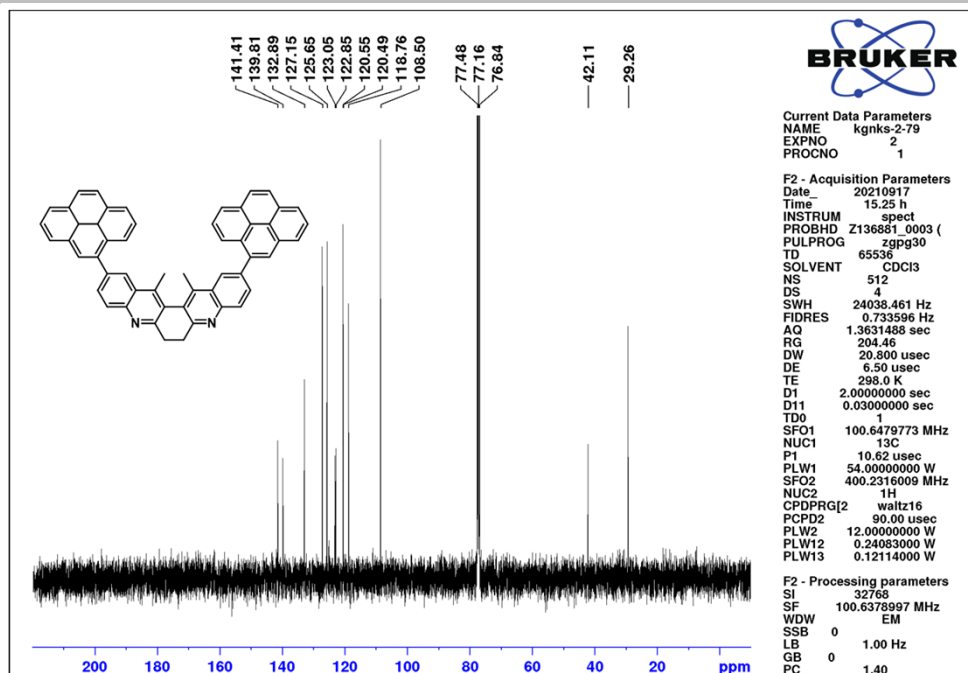SI Figure. 95:  $^{13}\text{C}$  NMR spectrum of compound **6k**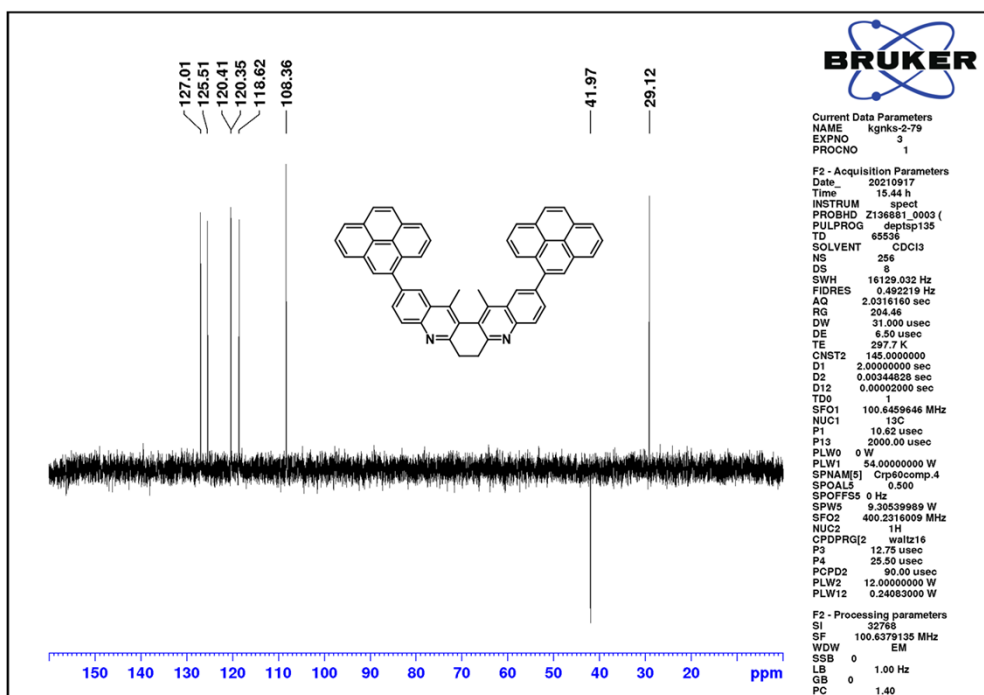SI Figure. 96: DEPT-135 spectrum of compound **6k**

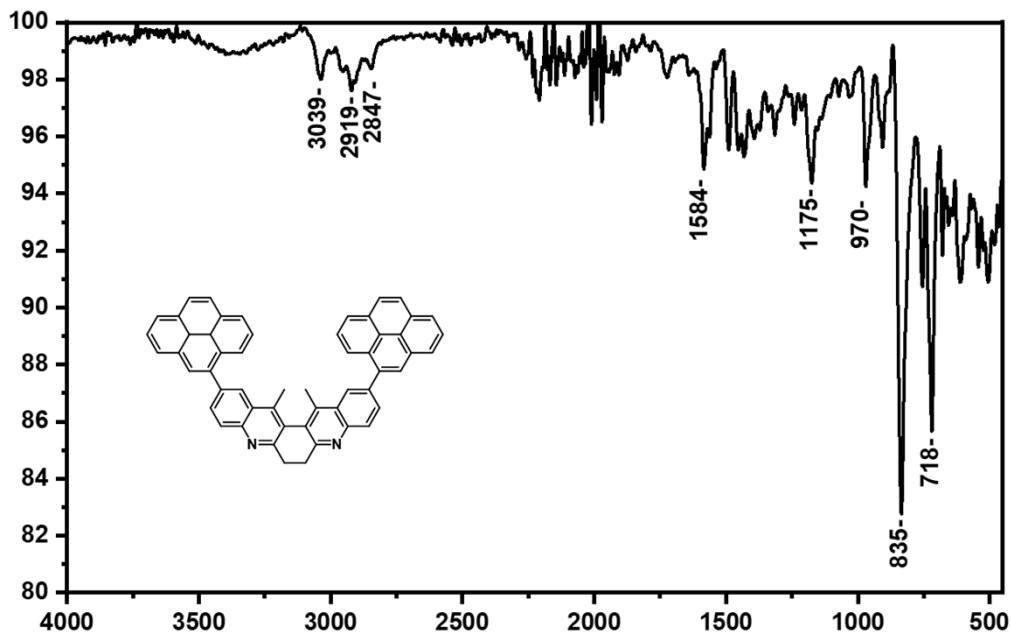

KGNKS-2/84)

SI Figure. 97: FTIR spectrum of compound 6k

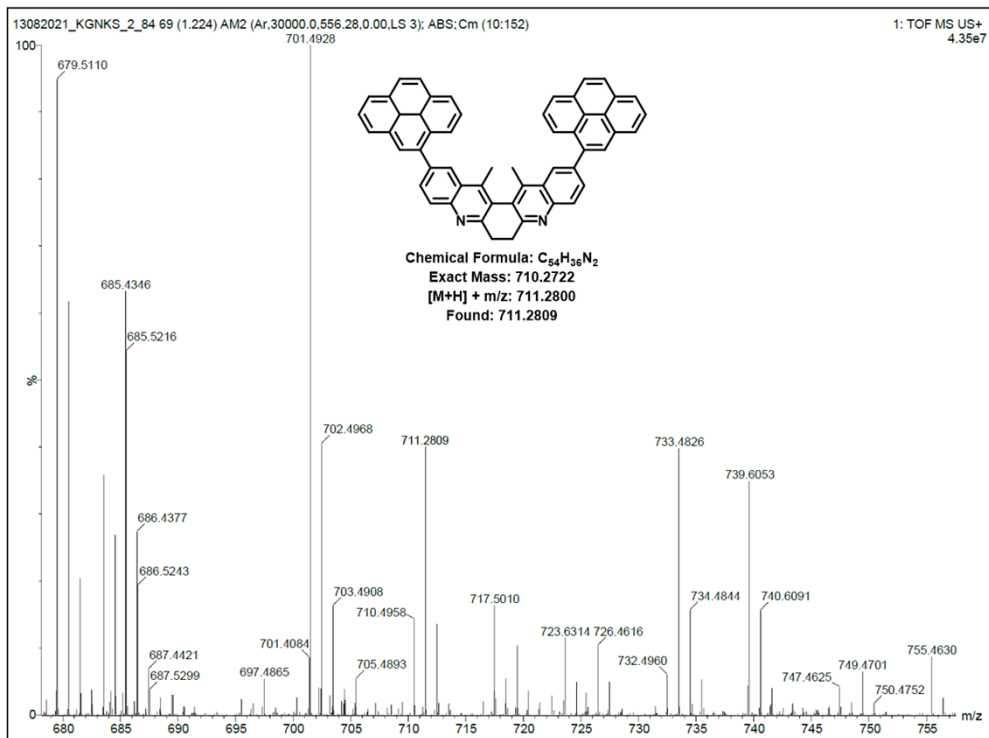

SI Figure. 98: HRMS spectrum of compound 6k

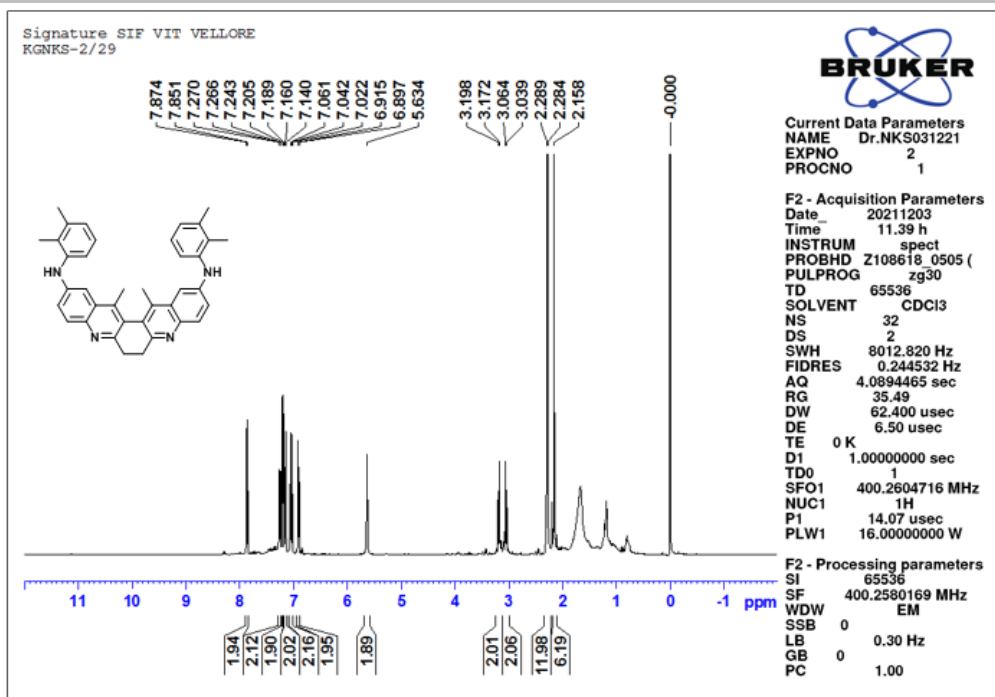SI Figure. 99:  $^1\text{H}$  NMR spectrum of compound 8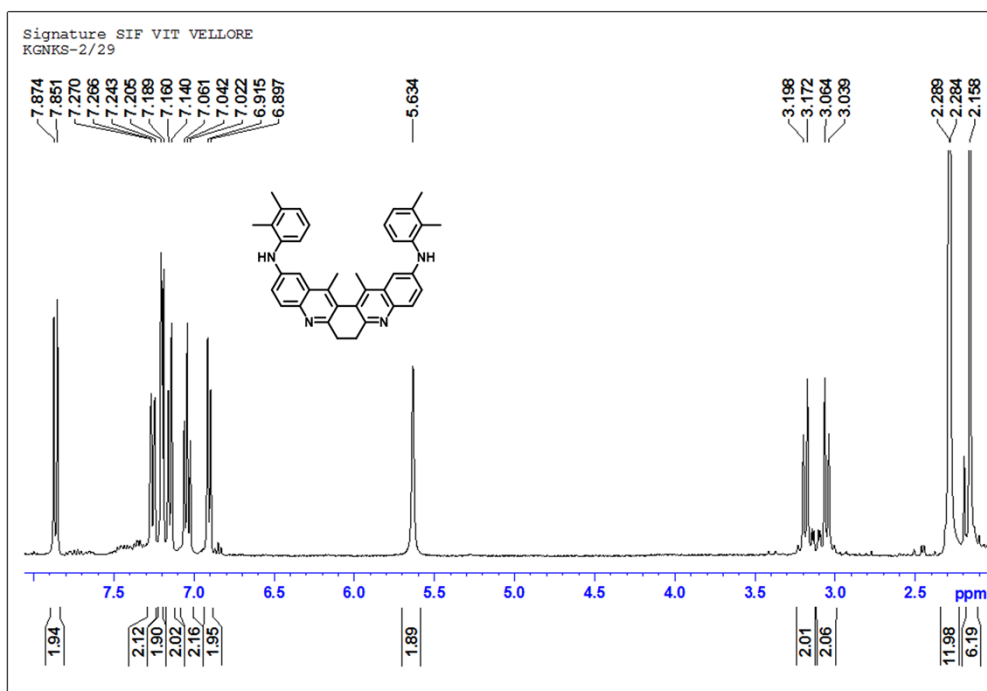SI Figure. 100: Expansion of  $^1\text{H}$  NMR spectrum of compound 8



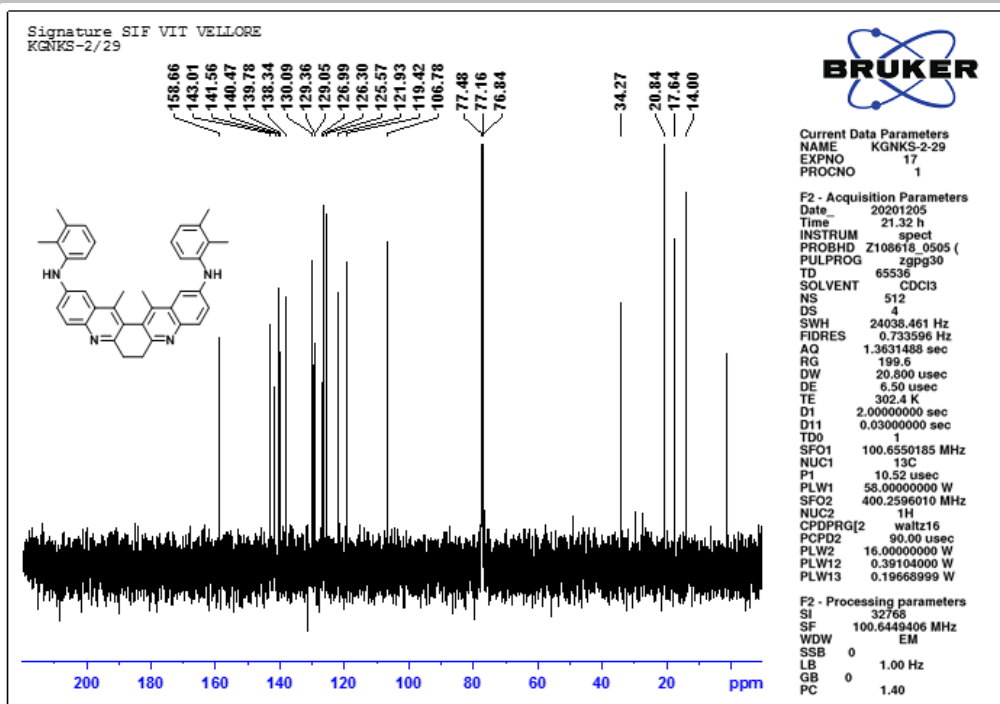SI Figure. 101:  $^{13}\text{C}$  NMR spectrum of compound 8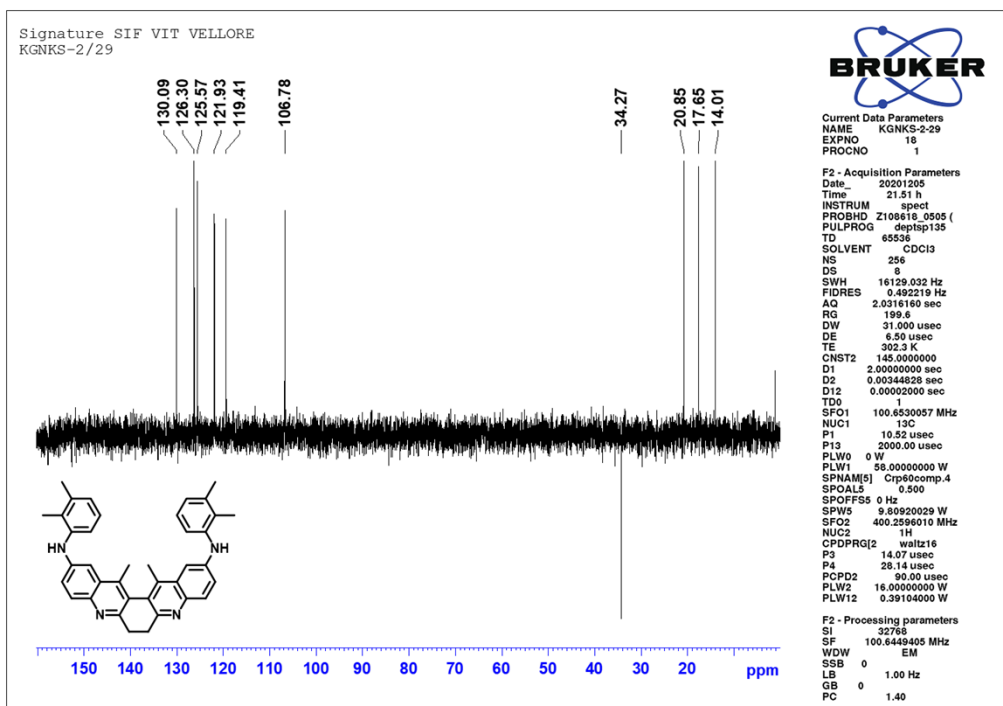

SI Figure. 102: DEPT-135 spectrum of compound 8

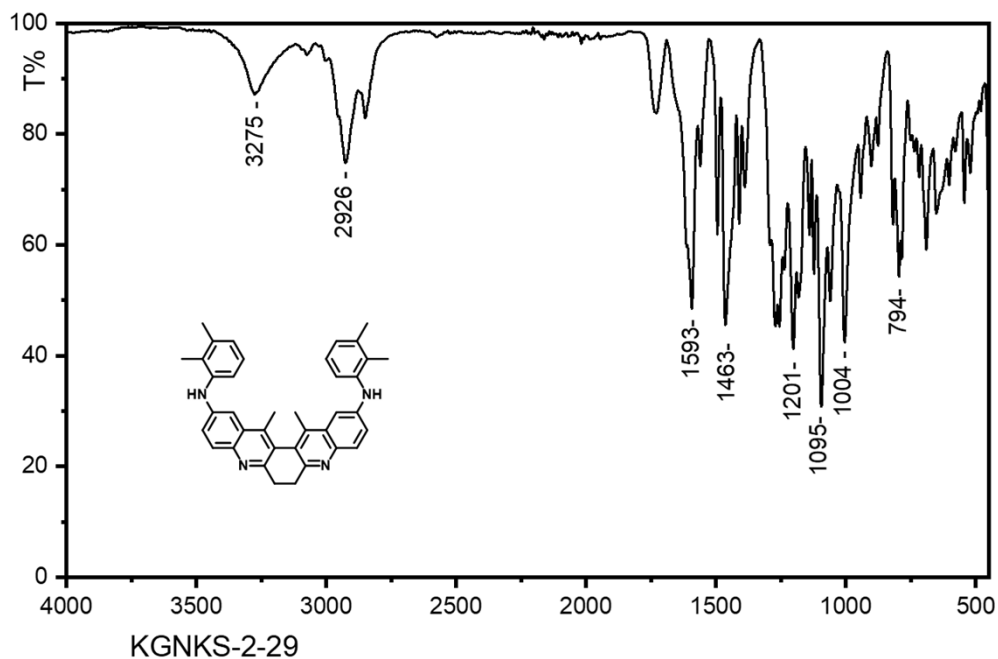

SI Figure. 103: FTIR spectrum of compound 8

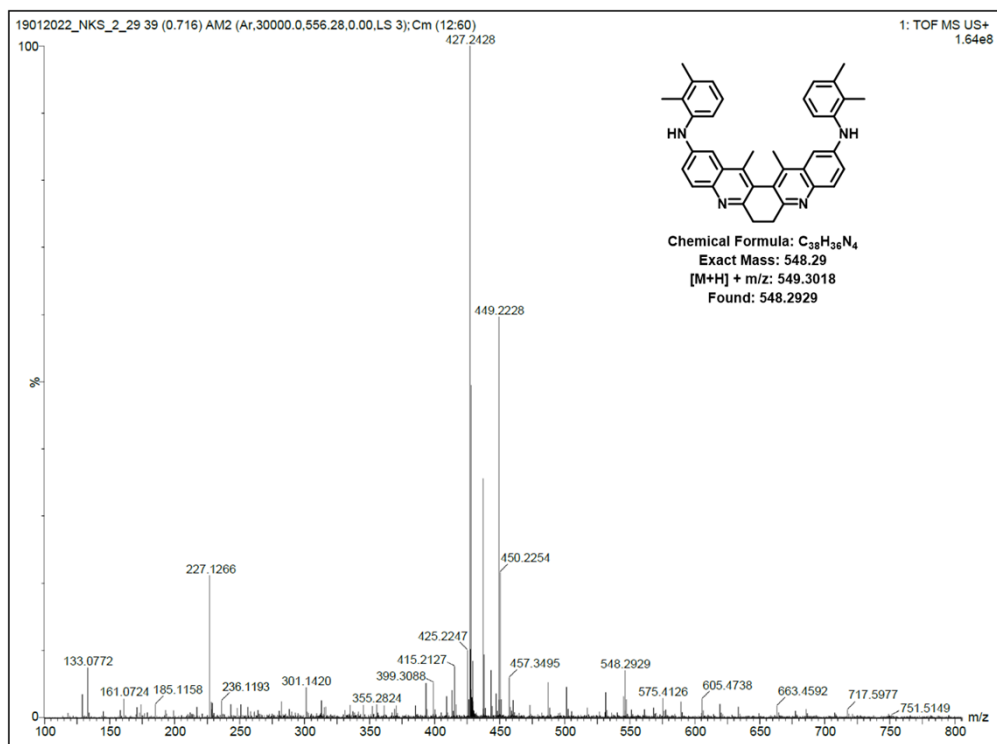

SI Figure. 104 HRMS spectrum of compound 8

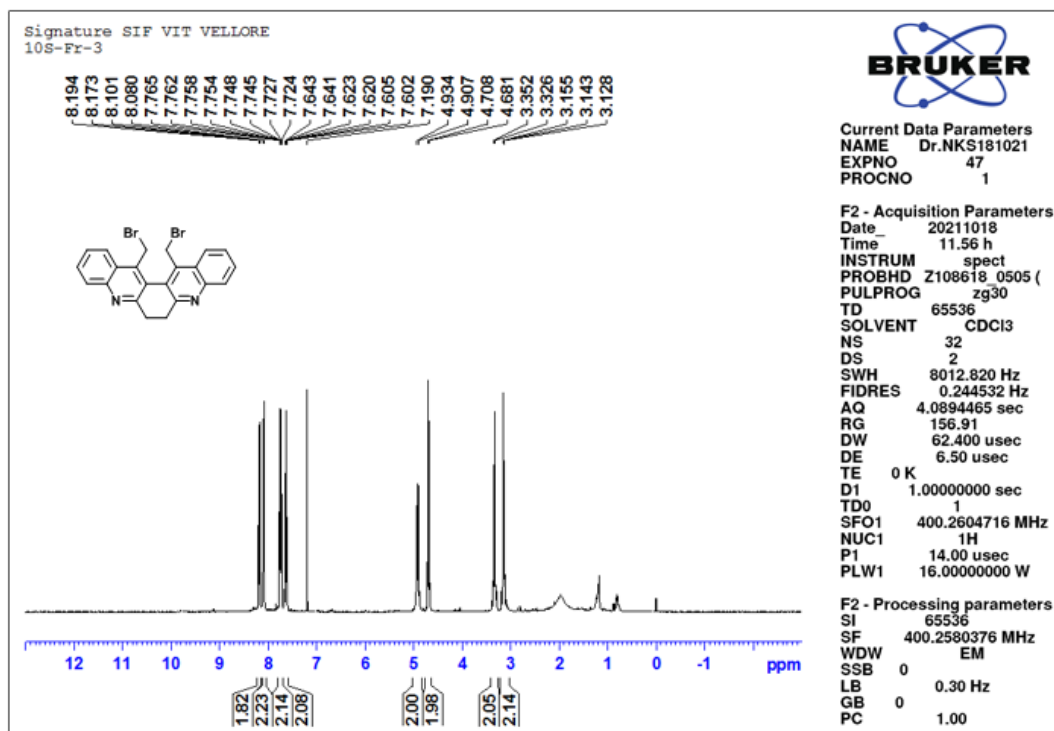SI Figure. 105:  $^1\text{H}$  NMR spectrum of compound **9a**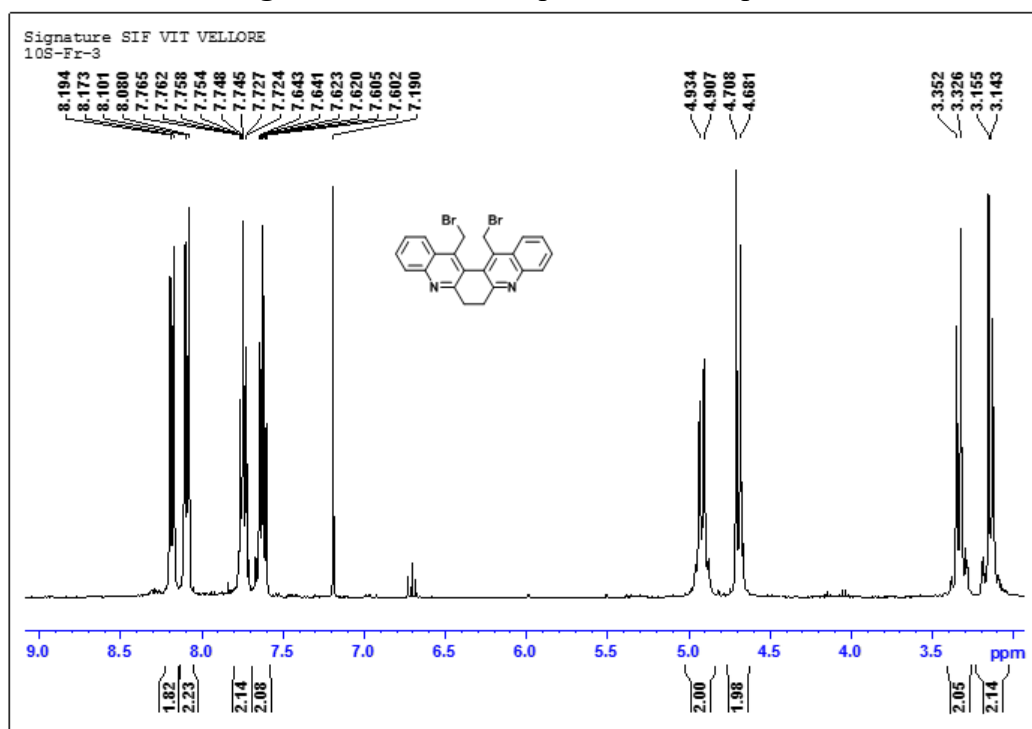SI Figure. 106: Expansion of  $^1\text{H}$  NMR spectrum of compound **9a**

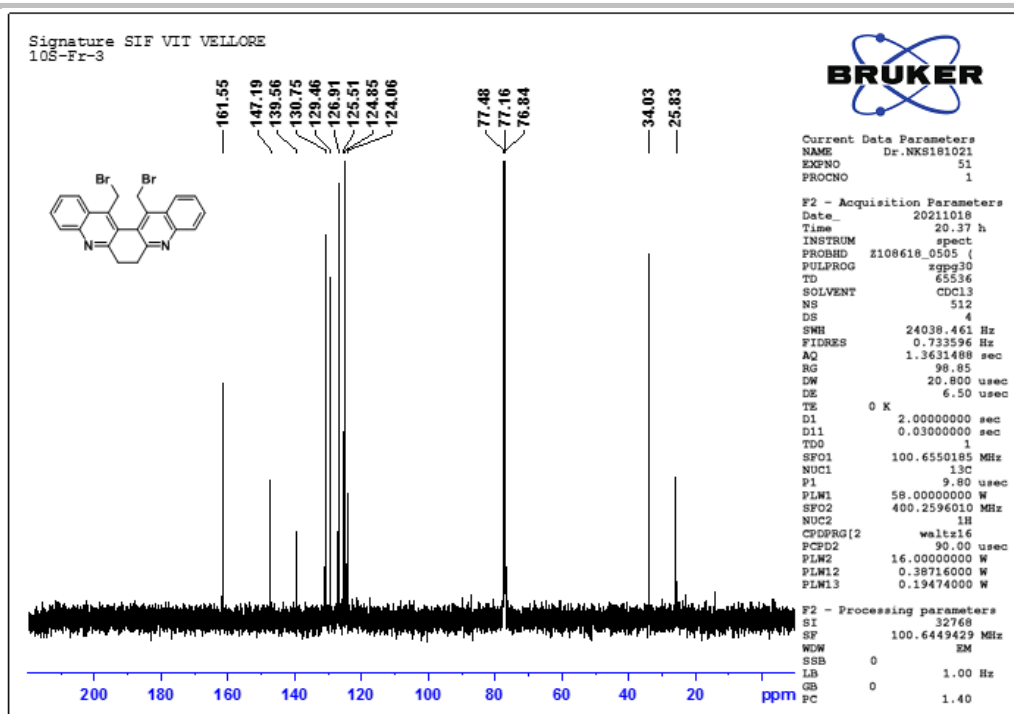SI Figure. 107:  $^{13}\text{C}$  NMR spectrum of compound 9a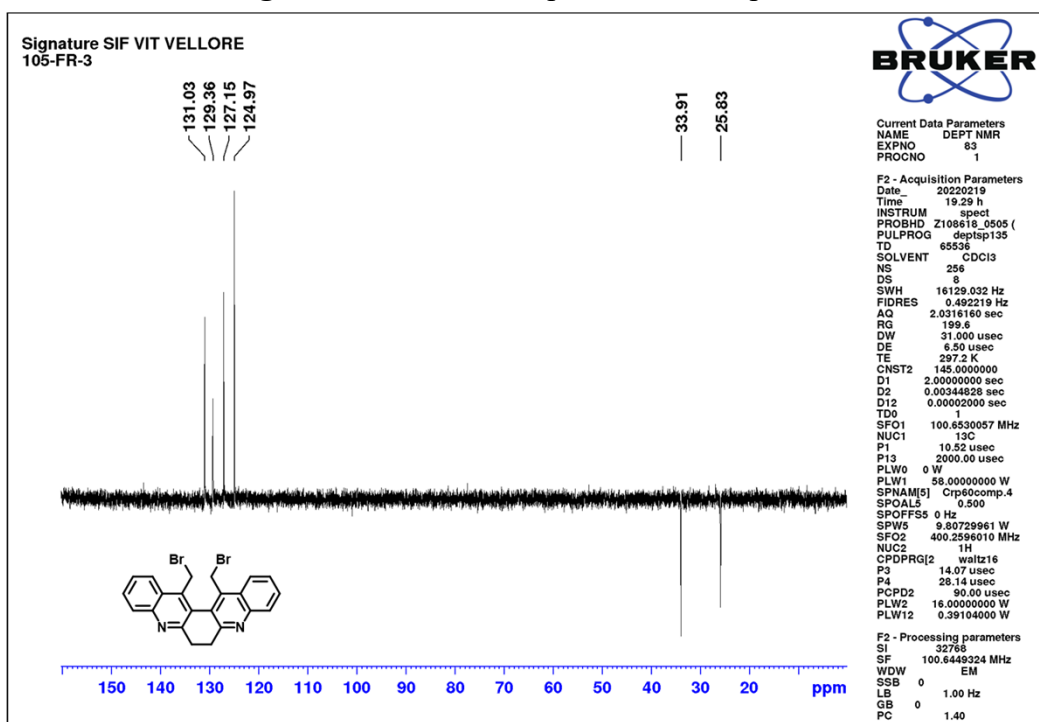

SI Figure. 108: DEPT-135 spectrum of compound 9a

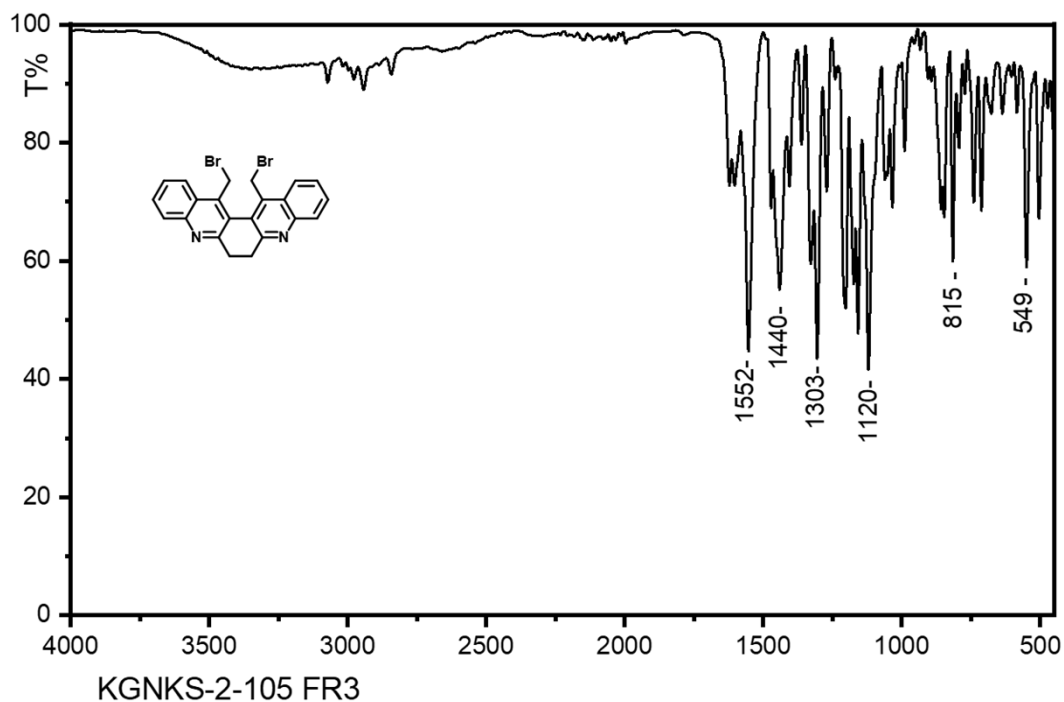

SI Figure. 109: FTIR spectrum of compound 9a

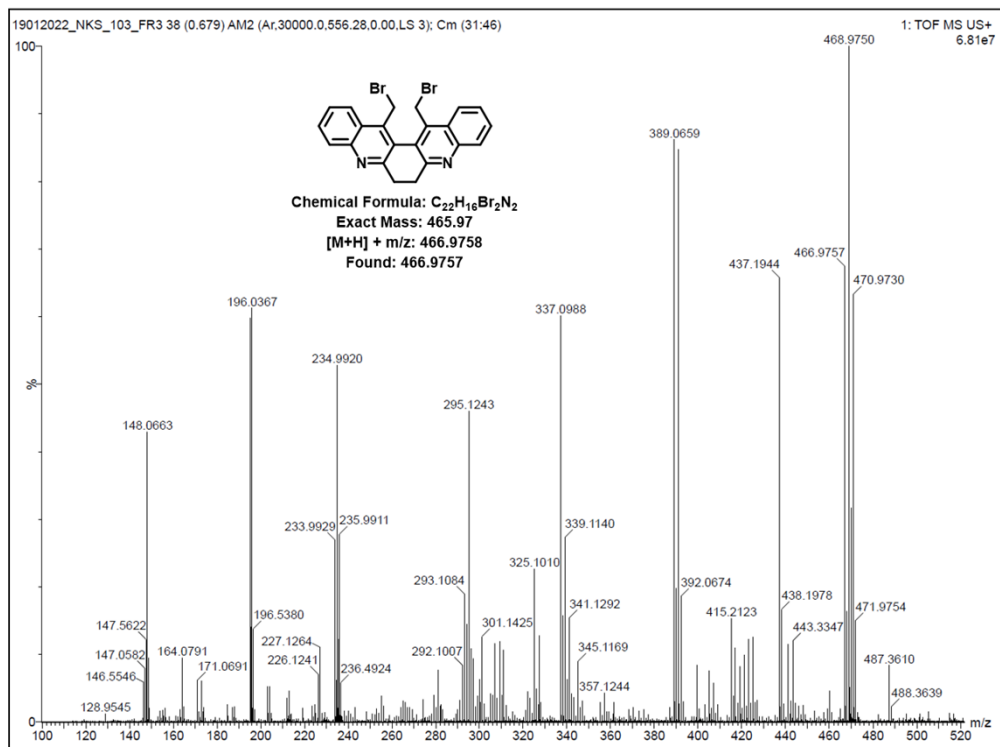

SI Figure. 110: HRMS spectrum of compound 9a

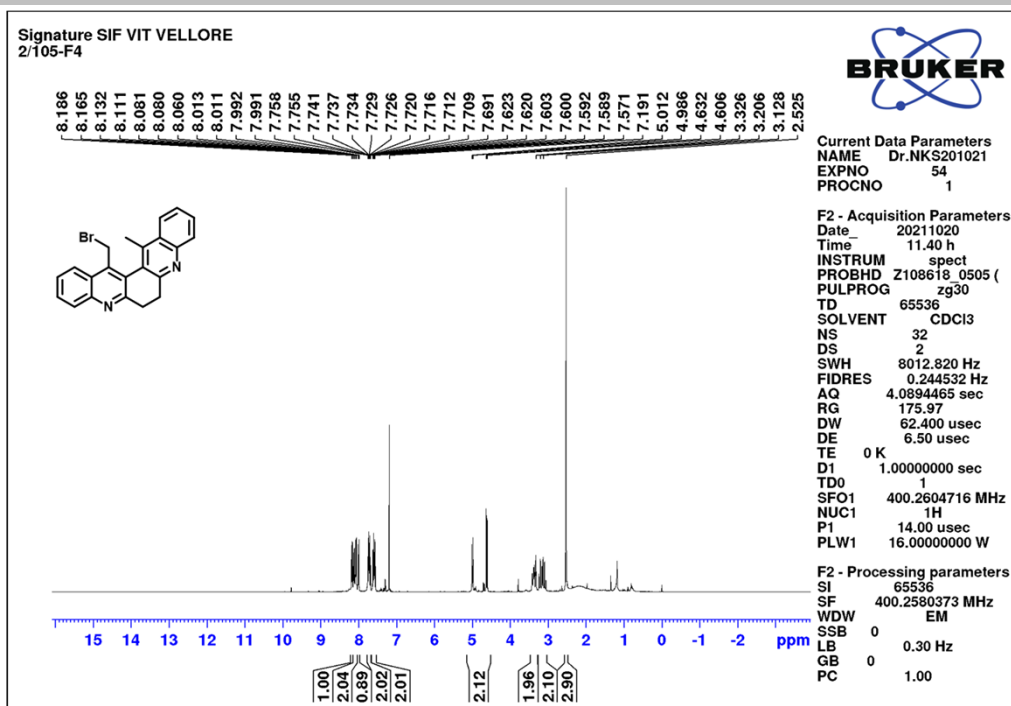SI Figure. 111:  $^1\text{H}$  NMR spectrum of compound 9b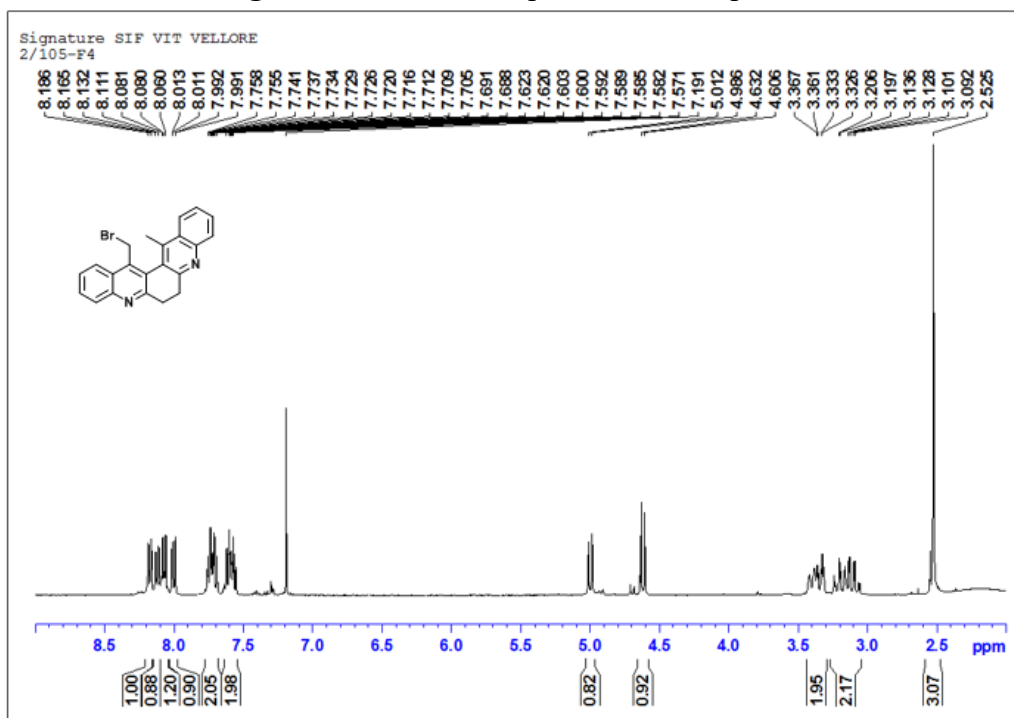SI Figure. 112: Expansion of  $^1\text{H}$  NMR spectrum of compound 9b

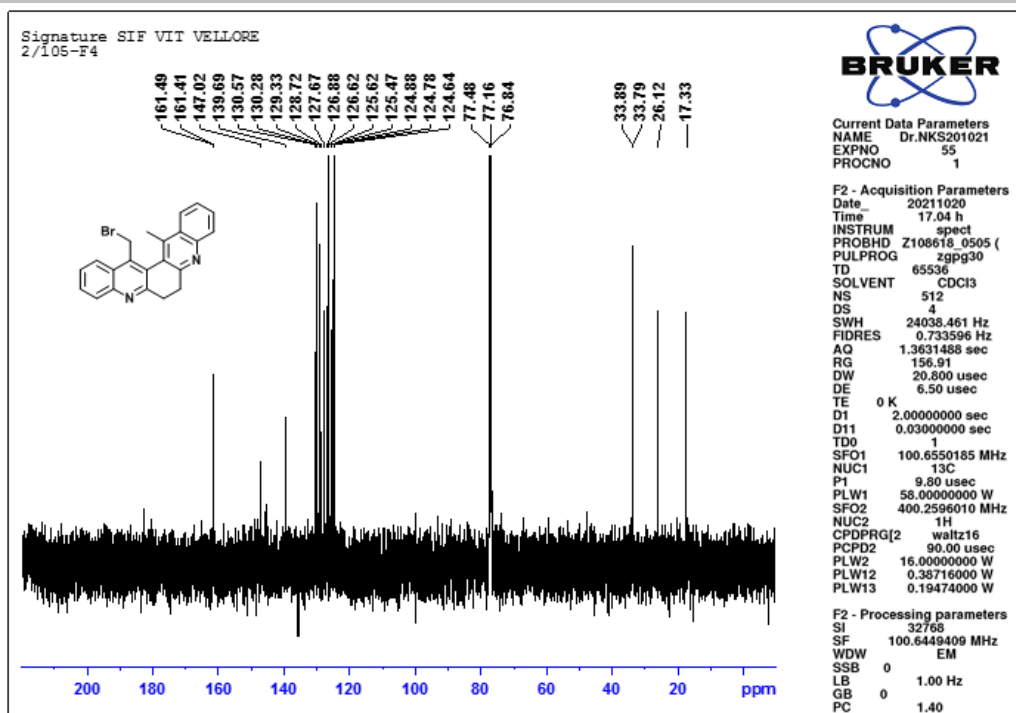SI Figure. 113:  $^{13}\text{C}$  NMR spectrum of compound 9b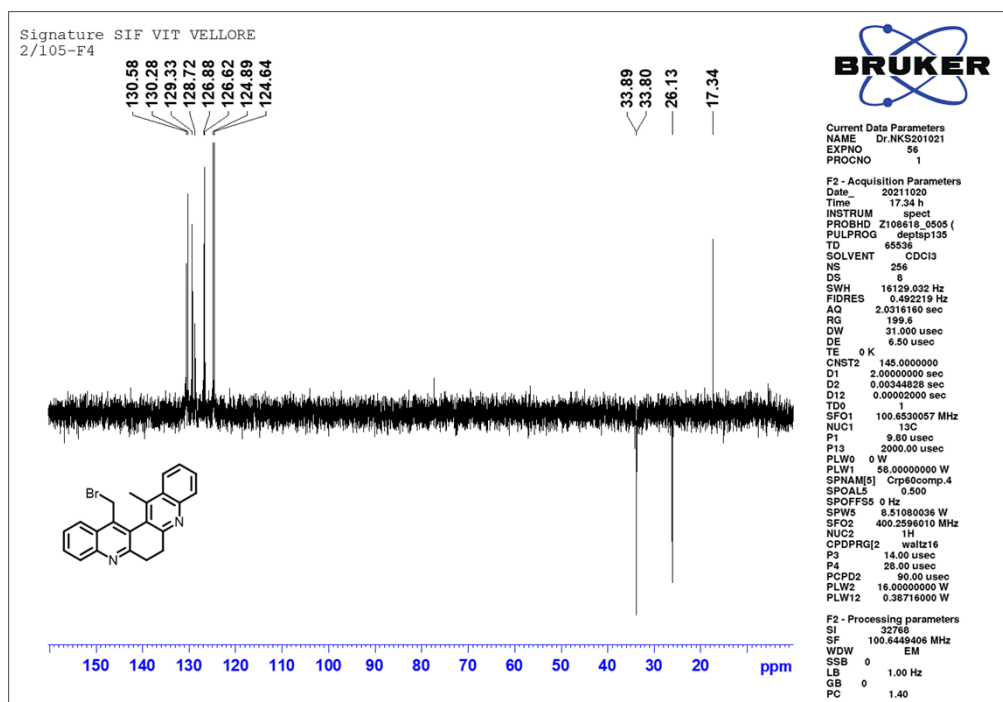

SI Figure. 114: DEPT-135 spectrum of compound 9b

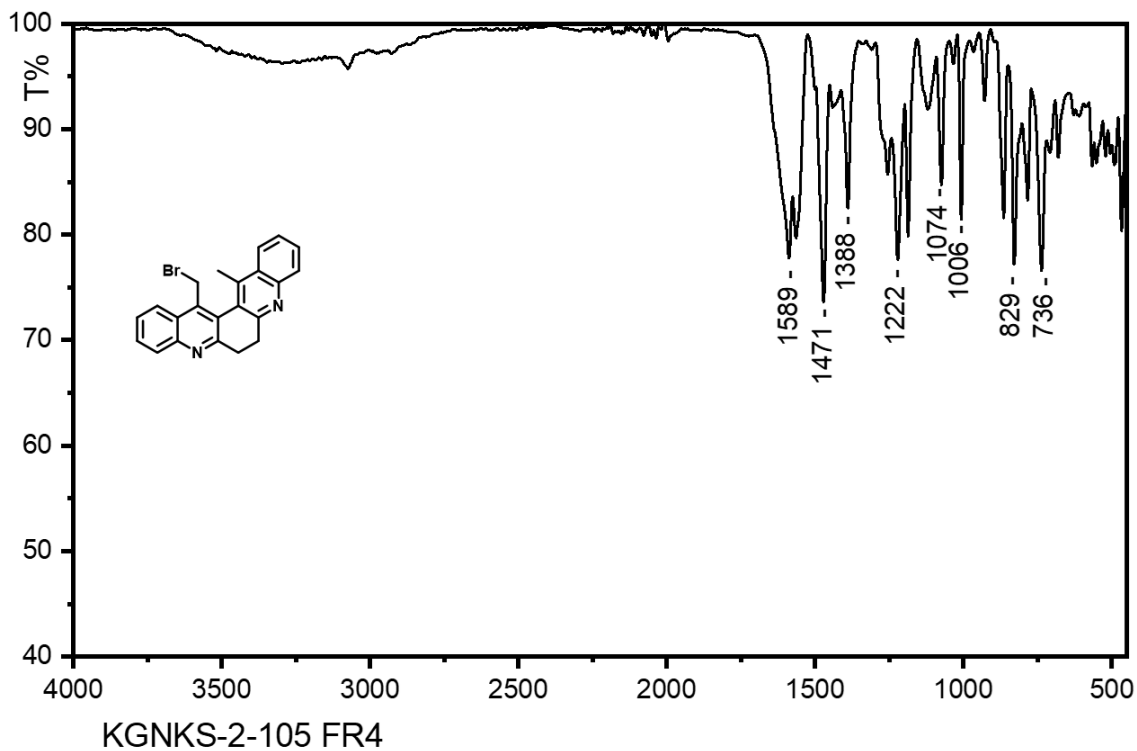SI Figure. 115: FTIR spectrum of compound **9b**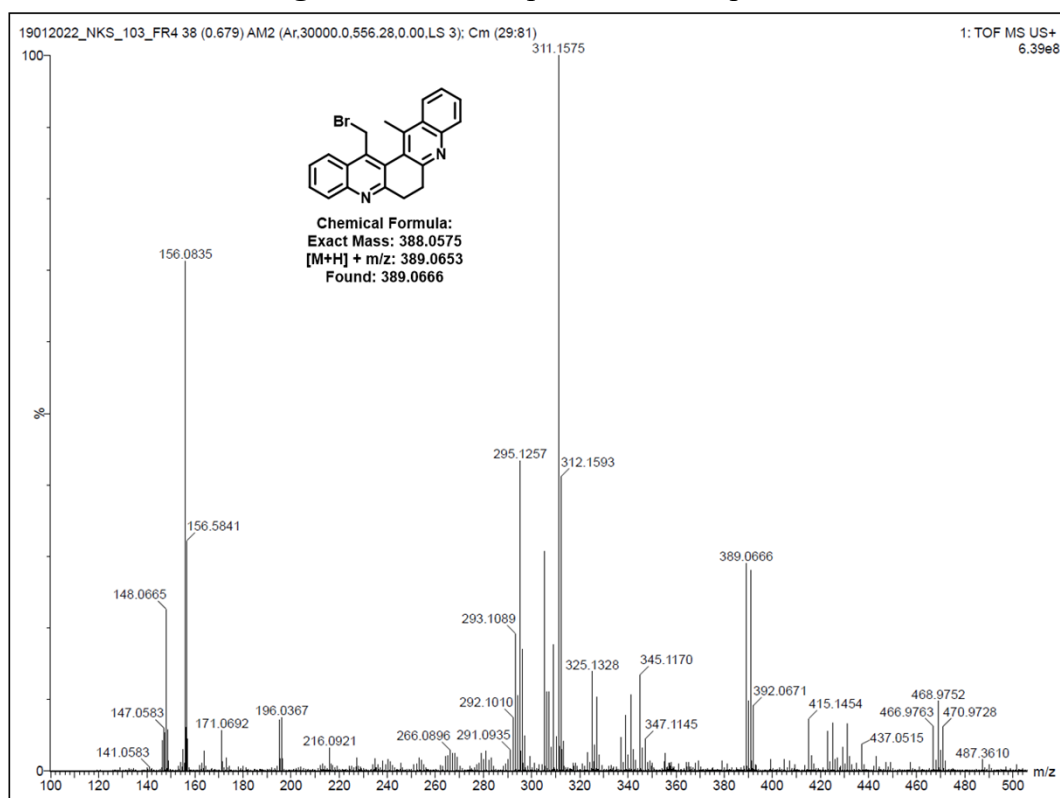SI Figure. 116: HRMS spectrum of compound **9b**



Basic crystallographic data of compound **6d**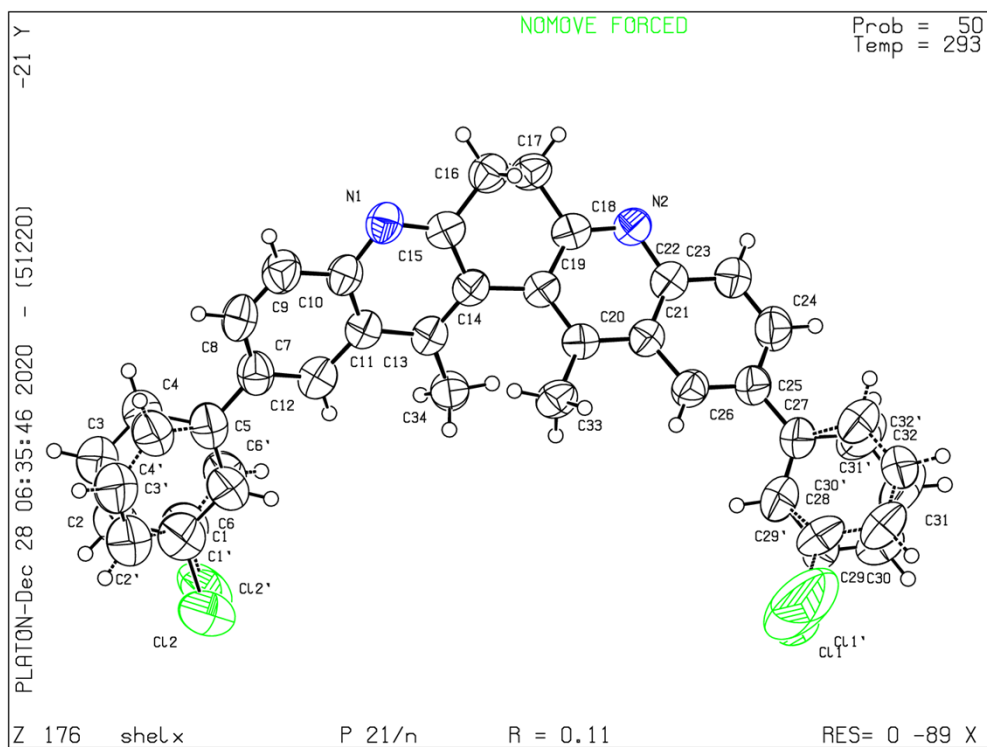SI Figure. 117: ORTEP diagram of compound **6d**

SI Table 6. Crystal data and structure refinement for kgnks-r1\_sq.

|                                 |                                                                |                   |
|---------------------------------|----------------------------------------------------------------|-------------------|
| Identification code             | shelx                                                          |                   |
| Empirical formula               | C <sub>34</sub> H <sub>24</sub> Cl <sub>2</sub> N <sub>2</sub> |                   |
| Formula weight                  | 531.45                                                         |                   |
| Temperature                     | 293(2) K                                                       |                   |
| Wavelength                      | 0.71073 Å                                                      |                   |
| Crystal system                  | Monoclinic                                                     |                   |
| Space group                     | P 21/n                                                         |                   |
| Unit cell dimensions            | a = 23.086(6) Å                                                | a = 90°.          |
|                                 | b = 4.9431(7) Å                                                | b = 108.441(14)°. |
|                                 | c = 26.214(5) Å                                                | g = 90°.          |
| Volume                          | 2837.8(10) Å <sup>3</sup>                                      |                   |
| Z                               | 4                                                              |                   |
| Density (calculated)            | 1.244 Mg/m <sup>3</sup>                                        |                   |
| Absorption coefficient          | 0.254 mm <sup>-1</sup>                                         |                   |
| F(000)                          | 1104                                                           |                   |
| Crystal size                    | 0.400 x 0.150 x 0.100 mm <sup>3</sup>                          |                   |
| Theta range for data collection | 2.841 to 25.070°.                                              |                   |

|                                   |                                             |
|-----------------------------------|---------------------------------------------|
| Index ranges                      | -27<=h<=27, -5<=k<=5, -31<=l<=31            |
| Reflections collected             | 42481                                       |
| Independent reflections           | 5003 [R(int) = 0.0819]                      |
| Completeness to theta = 25.070°   | 99.6 %                                      |
| Absorption correction             | Semi-empirical from equivalents             |
| Max. and min. transmission        | 0.7452 and 0.3995                           |
| Refinement method                 | Full-matrix least-squares on F <sup>2</sup> |
| Data / restraints / parameters    | 5003 / 357 / 447                            |
| Goodness-of-fit on F <sup>2</sup> | 1.175                                       |
| Final R indices [I>2sigma(I)]     | R1 = 0.1084, wR2 = 0.2958                   |
| R indices (all data)              | R1 = 0.1681, wR2 = 0.3433                   |
| Extinction coefficient            | 0.077(10)                                   |
| Largest diff. peak and hole       | 0.490 and -0.451 e.Å <sup>-3</sup>          |

**SI Table 7.** Atomic coordinates ( x 10<sup>4</sup>) and equivalent isotropic displacement parameters (Å<sup>2</sup>x 10<sup>3</sup>) for kgnks-r1\_sq. U(eq) is defined as one third of the trace of the orthogonalized U<sup>ij</sup> tensor.

|        | x        | y         | z        | U(eq)  |
|--------|----------|-----------|----------|--------|
| C(5)   | 6913(2)  | 10428(10) | 6373(2)  | 84(1)  |
| Cl(2)  | 6602(3)  | 9149(19)  | 4792(1)  | 200(3) |
| C(1)   | 6958(6)  | 10030(30) | 5456(4)  | 130(3) |
| C(2)   | 7541(5)  | 11240(30) | 5618(5)  | 127(3) |
| C(3)   | 7810(5)  | 11950(20) | 6147(4)  | 121(3) |
| C(4)   | 7511(4)  | 11540(19) | 6526(4)  | 95(3)  |
| C(6)   | 6637(6)  | 9710(20)  | 5832(4)  | 114(3) |
| Cl(2') | 6856(6)  | 7020(30)  | 4993(5)  | 159(5) |
| C(4')  | 7264(10) | 12680(40) | 6351(9)  | 104(5) |
| C(3')  | 7464(11) | 13130(60) | 5909(10) | 127(5) |
| C(6')  | 6792(13) | 8590(50)  | 5950(9)  | 104(5) |
| C(2')  | 7349(13) | 11460(60) | 5453(12) | 130(6) |
| C(1')  | 7016(11) | 9210(50)  | 5532(8)  | 129(6) |
| C(7)   | 6603(2)  | 10039(9)  | 6788(2)  | 72(1)  |
| C(8)   | 6763(2)  | 11584(9)  | 7269(2)  | 80(1)  |
| C(9)   | 6481(2)  | 11268(9)  | 7632(2)  | 79(1)  |
| C(10)  | 6004(2)  | 9378(8)   | 7562(2)  | 65(1)  |
| C(11)  | 5816(2)  | 7858(8)   | 7089(2)  | 60(1)  |
| C(12)  | 6132(2)  | 8175(8)   | 6708(2)  | 70(1)  |
| C(13)  | 5291(2)  | 6133(7)   | 6994(2)  | 60(1)  |

## SUPPORTING INFORMATION

|        |         |           |         |        |
|--------|---------|-----------|---------|--------|
| C(14)  | 4992(2) | 6135(7)   | 7376(2) | 59(1)  |
| C(15)  | 5270(2) | 7444(8)   | 7879(2) | 61(1)  |
| C(16)  | 5029(2) | 6824(8)   | 8331(2) | 69(1)  |
| C(17)  | 4855(2) | 3859(8)   | 8306(2) | 67(1)  |
| C(18)  | 4365(2) | 3295(8)   | 7782(2) | 61(1)  |
| C(19)  | 4406(2) | 4707(7)   | 7319(2) | 57(1)  |
| C(20)  | 3892(2) | 4786(8)   | 6860(2) | 58(1)  |
| C(21)  | 3391(2) | 3076(7)   | 6848(2) | 58(1)  |
| C(22)  | 3429(2) | 1470(8)   | 7307(2) | 62(1)  |
| C(23)  | 2960(2) | -347(9)   | 7292(2) | 70(1)  |
| C(24)  | 2454(2) | -553(11)  | 6842(2) | 83(1)  |
| C(25)  | 2387(2) | 1118(10)  | 6385(2) | 75(1)  |
| C(26)  | 2855(2) | 2906(9)   | 6400(2) | 67(1)  |
| C(27)  | 1839(2) | 897(15)   | 5918(2) | 107(2) |
| C(28)  | 1781(3) | 2082(15)  | 5421(2) | 122(2) |
| Cl(1)  | 1240(2) | 3073(9)   | 4359(1) | 131(2) |
| C(29)  | 1276(4) | 1730(30)  | 4958(3) | 115(3) |
| C(30)  | 850(5)  | 10(30)    | 4977(4) | 141(4) |
| C(31)  | 885(5)  | -1480(30) | 5433(4) | 166(4) |
| C(32)  | 1399(5) | -1290(30) | 5901(4) | 146(4) |
| Cl(1') | 1104(7) | 4740(40)  | 4543(6) | 314(9) |
| C(29') | 1206(8) | 3070(30)  | 5094(6) | 138(6) |
| C(30') | 654(9)  | 2510(50)  | 5146(7) | 147(5) |
| C(31') | 711(7)  | 1500(50)  | 5622(6) | 133(5) |
| C(32') | 1261(6) | 1110(60)  | 6027(7) | 135(5) |
| C(33)  | 3838(2) | 6694(9)   | 6397(2) | 71(1)  |
| C(34)  | 5115(2) | 4285(9)   | 6510(2) | 69(1)  |
| N(1)   | 5758(2) | 9050(7)   | 7978(1) | 69(1)  |
| N(2)   | 3901(2) | 1725(6)   | 7783(1) | 63(1)  |

**SI Table 8.** Bond lengths [ $\text{\AA}$ ] and angles [ $^\circ$ ] for kgnks-r1\_sq.

|            |           |
|------------|-----------|
| C(5)-C(4') | 1.386(16) |
| C(5)-C(6') | 1.391(18) |
| C(5)-C(6)  | 1.402(10) |
| C(5)-C(4)  | 1.420(9)  |
| C(5)-C(7)  | 1.493(6)  |
| Cl(2)-C(1) | 1.731(9)  |
| C(1)-C(2)  | 1.409(12) |

## SUPPORTING INFORMATION

|              |           |
|--------------|-----------|
| C(1)-C(6)    | 1.418(11) |
| C(2)-C(3)    | 1.373(11) |
| C(2)-H(2)    | 0.9300    |
| C(3)-C(4)    | 1.392(10) |
| C(3)-H(3)    | 0.9300    |
| C(4)-H(4)    | 0.9300    |
| C(6)-H(6)    | 0.9300    |
| Cl(2')-C(1') | 1.725(17) |
| C(4')-C(3')  | 1.396(18) |
| C(4')-H(4')  | 0.9300    |
| C(3')-C(2')  | 1.409(19) |
| C(3')-H(3')  | 0.9300    |
| C(6')-C(1')  | 1.386(19) |
| C(6')-H(6')  | 0.9300    |
| C(2')-C(1')  | 1.40(2)   |
| C(2')-H(2')  | 0.9300    |
| C(7)-C(12)   | 1.389(6)  |
| C(7)-C(8)    | 1.419(6)  |
| C(8)-C(9)    | 1.321(6)  |
| C(8)-H(8)    | 0.9300    |
| C(9)-C(10)   | 1.412(6)  |
| C(9)-H(9)    | 0.9300    |
| C(10)-N(1)   | 1.389(5)  |
| C(10)-C(11)  | 1.395(6)  |
| C(11)-C(12)  | 1.421(6)  |
| C(11)-C(13)  | 1.438(6)  |
| C(12)-H(12)  | 0.9300    |
| C(13)-C(14)  | 1.384(5)  |
| C(13)-C(34)  | 1.512(6)  |
| C(14)-C(15)  | 1.425(5)  |
| C(14)-C(19)  | 1.492(5)  |
| C(15)-N(1)   | 1.333(5)  |
| C(15)-C(16)  | 1.493(6)  |
| C(16)-C(17)  | 1.516(6)  |
| C(16)-H(16A) | 0.9700    |
| C(16)-H(16B) | 0.9700    |
| C(17)-C(18)  | 1.504(6)  |
| C(17)-H(17A) | 0.9700    |
| C(17)-H(17B) | 0.9700    |

## SUPPORTING INFORMATION

|               |           |
|---------------|-----------|
| C(18)-N(2)    | 1.324(5)  |
| C(18)-C(19)   | 1.429(5)  |
| C(19)-C(20)   | 1.398(5)  |
| C(20)-C(21)   | 1.425(6)  |
| C(20)-C(33)   | 1.510(6)  |
| C(21)-C(26)   | 1.413(6)  |
| C(21)-C(22)   | 1.420(6)  |
| C(22)-N(2)    | 1.378(5)  |
| C(22)-C(23)   | 1.399(6)  |
| C(23)-C(24)   | 1.375(6)  |
| C(23)-H(23)   | 0.9300    |
| C(24)-C(25)   | 1.424(7)  |
| C(24)-H(24)   | 0.9300    |
| C(25)-C(26)   | 1.387(6)  |
| C(25)-C(27)   | 1.461(7)  |
| C(26)-H(26)   | 0.9300    |
| C(27)-C(28)   | 1.395(7)  |
| C(27)-C(32')  | 1.456(15) |
| C(27)-C(32)   | 1.473(11) |
| C(28)-C(29)   | 1.402(10) |
| C(28)-C(29')  | 1.421(15) |
| C(28)-H(28)   | 0.9300    |
| Cl(1)-C(29)   | 1.684(9)  |
| C(29)-C(30)   | 1.312(11) |
| C(30)-C(31)   | 1.385(12) |
| C(30)-H(30)   | 0.9300    |
| C(31)-C(32)   | 1.413(11) |
| C(31)-H(31)   | 0.9300    |
| C(32)-H(32)   | 0.9300    |
| Cl(1')-C(29') | 1.613(15) |
| C(29')-C(30') | 1.354(16) |
| C(30')-C(31') | 1.312(16) |
| C(30')-H(30') | 0.9300    |
| C(31')-C(32') | 1.386(16) |
| C(31')-H(31') | 0.9300    |
| C(32')-H(32') | 0.9300    |
| C(33)-H(33A)  | 0.9600    |
| C(33)-H(33B)  | 0.9600    |
| C(33)-H(33C)  | 0.9600    |

## SUPPORTING INFORMATION

---

|                    |           |
|--------------------|-----------|
| C(34)-H(34A)       | 0.9600    |
| C(34)-H(34B)       | 0.9600    |
| C(34)-H(34C)       | 0.9600    |
|                    |           |
| C(4')-C(5)-C(6')   | 117.6(16) |
| C(6)-C(5)-C(4)     | 118.3(7)  |
| C(4')-C(5)-C(7)    | 123.6(11) |
| C(6')-C(5)-C(7)    | 118.3(13) |
| C(6)-C(5)-C(7)     | 122.3(6)  |
| C(4)-C(5)-C(7)     | 119.4(6)  |
| C(2)-C(1)-C(6)     | 119.8(9)  |
| C(2)-C(1)-Cl(2)    | 121.0(9)  |
| C(6)-C(1)-Cl(2)    | 119.0(8)  |
| C(3)-C(2)-C(1)     | 119.7(10) |
| C(3)-C(2)-H(2)     | 120.2     |
| C(1)-C(2)-H(2)     | 120.2     |
| C(2)-C(3)-C(4)     | 121.1(9)  |
| C(2)-C(3)-H(3)     | 119.5     |
| C(4)-C(3)-H(3)     | 119.5     |
| C(3)-C(4)-C(5)     | 120.7(8)  |
| C(3)-C(4)-H(4)     | 119.6     |
| C(5)-C(4)-H(4)     | 119.6     |
| C(5)-C(6)-C(1)     | 120.2(9)  |
| C(5)-C(6)-H(6)     | 119.9     |
| C(1)-C(6)-H(6)     | 119.9     |
| C(5)-C(4')-C(3')   | 121.0(19) |
| C(5)-C(4')-H(4')   | 119.5     |
| C(3')-C(4')-H(4')  | 119.5     |
| C(4')-C(3')-C(2')  | 126(2)    |
| C(4')-C(3')-H(3')  | 117.0     |
| C(2')-C(3')-H(3')  | 117.0     |
| C(1')-C(6')-C(5)   | 116.9(19) |
| C(1')-C(6')-H(6')  | 121.6     |
| C(5)-C(6')-H(6')   | 121.6     |
| C(1')-C(2')-C(3')  | 108(3)    |
| C(1')-C(2')-H(2')  | 126.2     |
| C(3')-C(2')-H(2')  | 126.2     |
| C(6')-C(1')-C(2')  | 131(2)    |
| C(6')-C(1')-Cl(2') | 118.0(18) |

|                     |           |
|---------------------|-----------|
| C(2')-C(1')-Cl(2')  | 111.1(19) |
| C(12)-C(7)-C(8)     | 117.6(4)  |
| C(12)-C(7)-C(5)     | 120.5(4)  |
| C(8)-C(7)-C(5)      | 121.9(4)  |
| C(9)-C(8)-C(7)      | 121.8(4)  |
| C(9)-C(8)-H(8)      | 119.1     |
| C(7)-C(8)-H(8)      | 119.1     |
| C(8)-C(9)-C(10)     | 121.8(4)  |
| C(8)-C(9)-H(9)      | 119.1     |
| C(10)-C(9)-H(9)     | 119.1     |
| N(1)-C(10)-C(11)    | 123.0(4)  |
| N(1)-C(10)-C(9)     | 118.1(4)  |
| C(11)-C(10)-C(9)    | 118.8(4)  |
| C(10)-C(11)-C(12)   | 118.8(4)  |
| C(10)-C(11)-C(13)   | 118.8(4)  |
| C(12)-C(11)-C(13)   | 122.4(4)  |
| C(7)-C(12)-C(11)    | 121.1(4)  |
| C(7)-C(12)-H(12)    | 119.4     |
| C(11)-C(12)-H(12)   | 119.4     |
| C(14)-C(13)-C(11)   | 117.4(4)  |
| C(14)-C(13)-C(34)   | 123.0(4)  |
| C(11)-C(13)-C(34)   | 119.5(4)  |
| C(13)-C(14)-C(15)   | 119.1(4)  |
| C(13)-C(14)-C(19)   | 124.8(3)  |
| C(15)-C(14)-C(19)   | 115.9(3)  |
| N(1)-C(15)-C(14)    | 123.8(4)  |
| N(1)-C(15)-C(16)    | 118.1(4)  |
| C(14)-C(15)-C(16)   | 117.9(4)  |
| C(15)-C(16)-C(17)   | 108.9(3)  |
| C(15)-C(16)-H(16A)  | 109.9     |
| C(17)-C(16)-H(16A)  | 109.9     |
| C(15)-C(16)-H(16B)  | 109.9     |
| C(17)-C(16)-H(16B)  | 109.9     |
| H(16A)-C(16)-H(16B) | 108.3     |
| C(18)-C(17)-C(16)   | 109.3(3)  |
| C(18)-C(17)-H(17A)  | 109.8     |
| C(16)-C(17)-H(17A)  | 109.8     |
| C(18)-C(17)-H(17B)  | 109.8     |
| C(16)-C(17)-H(17B)  | 109.8     |

---

|                     |          |
|---------------------|----------|
| H(17A)-C(17)-H(17B) | 108.3    |
| N(2)-C(18)-C(19)    | 123.9(4) |
| N(2)-C(18)-C(17)    | 118.9(4) |
| C(19)-C(18)-C(17)   | 116.9(4) |
| C(20)-C(19)-C(18)   | 118.6(4) |
| C(20)-C(19)-C(14)   | 124.7(3) |
| C(18)-C(19)-C(14)   | 116.5(3) |
| C(19)-C(20)-C(21)   | 117.7(3) |
| C(19)-C(20)-C(33)   | 122.7(4) |
| C(21)-C(20)-C(33)   | 119.5(4) |
| C(26)-C(21)-C(22)   | 118.3(4) |
| C(26)-C(21)-C(20)   | 123.0(4) |
| C(22)-C(21)-C(20)   | 118.7(4) |
| N(2)-C(22)-C(23)    | 117.8(4) |
| N(2)-C(22)-C(21)    | 122.4(4) |
| C(23)-C(22)-C(21)   | 119.7(4) |
| C(24)-C(23)-C(22)   | 120.8(4) |
| C(24)-C(23)-H(23)   | 119.6    |
| C(22)-C(23)-H(23)   | 119.6    |
| C(23)-C(24)-C(25)   | 121.0(4) |
| C(23)-C(24)-H(24)   | 119.5    |
| C(25)-C(24)-H(24)   | 119.5    |
| C(26)-C(25)-C(24)   | 118.1(4) |
| C(26)-C(25)-C(27)   | 122.1(5) |
| C(24)-C(25)-C(27)   | 119.8(4) |
| C(25)-C(26)-C(21)   | 122.0(4) |
| C(25)-C(26)-H(26)   | 119.0    |
| C(21)-C(26)-H(26)   | 119.0    |
| C(28)-C(27)-C(32')  | 109.4(9) |
| C(28)-C(27)-C(25)   | 123.5(5) |
| C(32')-C(27)-C(25)  | 115.7(8) |
| C(28)-C(27)-C(32)   | 114.7(6) |
| C(25)-C(27)-C(32)   | 119.1(6) |
| C(27)-C(28)-C(29)   | 124.3(6) |
| C(27)-C(28)-C(29')  | 120.2(9) |
| C(27)-C(28)-H(28)   | 117.9    |
| C(29)-C(28)-H(28)   | 117.9    |
| C(30)-C(29)-C(28)   | 118.4(8) |
| C(30)-C(29)-Cl(1)   | 118.3(7) |



---

|                      |           |
|----------------------|-----------|
| C(28)-C(29)-Cl(1)    | 122.7(7)  |
| C(29)-C(30)-C(31)    | 122.5(9)  |
| C(29)-C(30)-H(30)    | 118.8     |
| C(31)-C(30)-H(30)    | 118.8     |
| C(30)-C(31)-C(32)    | 121.1(10) |
| C(30)-C(31)-H(31)    | 119.4     |
| C(32)-C(31)-H(31)    | 119.4     |
| C(31)-C(32)-C(27)    | 117.2(9)  |
| C(31)-C(32)-H(32)    | 121.4     |
| C(27)-C(32)-H(32)    | 121.4     |
| C(30')-C(29')-C(28)  | 126.8(15) |
| C(30')-C(29')-Cl(1') | 108.6(12) |
| C(28)-C(29')-Cl(1')  | 124.1(13) |
| C(31')-C(30')-C(29') | 111.1(16) |
| C(31')-C(30')-H(30') | 124.4     |
| C(29')-C(30')-H(30') | 124.4     |
| C(30')-C(31')-C(32') | 125.0(17) |
| C(30')-C(31')-H(31') | 117.5     |
| C(32')-C(31')-H(31') | 117.5     |
| C(31')-C(32')-C(27)  | 122.2(15) |
| C(31')-C(32')-H(32') | 118.9     |
| C(27)-C(32')-H(32')  | 118.9     |
| C(20)-C(33)-H(33A)   | 109.5     |
| C(20)-C(33)-H(33B)   | 109.5     |
| H(33A)-C(33)-H(33B)  | 109.5     |
| C(20)-C(33)-H(33C)   | 109.5     |
| H(33A)-C(33)-H(33C)  | 109.5     |
| H(33B)-C(33)-H(33C)  | 109.5     |
| C(13)-C(34)-H(34A)   | 109.5     |
| C(13)-C(34)-H(34B)   | 109.5     |
| H(34A)-C(34)-H(34B)  | 109.5     |
| C(13)-C(34)-H(34C)   | 109.5     |
| H(34A)-C(34)-H(34C)  | 109.5     |
| H(34B)-C(34)-H(34C)  | 109.5     |
| C(15)-N(1)-C(10)     | 116.5(3)  |
| C(18)-N(2)-C(22)     | 117.4(3)  |

---

Symmetry transformations used to generate equivalent atoms:

**SI Table 9.** Anisotropic displacement parameters ( $\text{\AA}^2 \times 10^3$ ) for kgnks-r1\_sq. The anisotropic displacement factor exponent takes the form:  $-2p^2 [ h^2 a^{*2} U^{11} + \dots + 2 h k a^* b^* U^{12} ]$

|        | U11     | U22     | U33     | U23    | U13    | U12    |
|--------|---------|---------|---------|--------|--------|--------|
| C(5)   | 74(3)   | 83(3)   | 99(4)   | 6(3)   | 33(3)  | -6(2)  |
| Cl(2)  | 206(4)  | 301(7)  | 96(2)   | -2(3)  | 54(2)  | -97(4) |
| C(1)   | 126(6)  | 164(7)  | 104(6)  | -12(5) | 42(5)  | -37(6) |
| C(2)   | 120(7)  | 168(7)  | 103(7)  | -11(6) | 50(5)  | -40(6) |
| C(3)   | 99(6)   | 155(7)  | 104(6)  | 6(5)   | 24(5)  | -40(5) |
| C(4)   | 82(5)   | 114(6)  | 91(5)   | 12(4)  | 29(4)  | -15(5) |
| C(6)   | 110(7)  | 150(8)  | 88(5)   | 8(5)   | 38(5)  | -42(6) |
| Cl(2') | 197(9)  | 197(9)  | 122(7)  | -33(6) | 107(6) | -56(7) |
| C(4')  | 103(10) | 118(10) | 98(9)   | -4(9)  | 43(8)  | -28(9) |
| C(3')  | 114(9)  | 146(10) | 117(9)  | 8(9)   | 32(8)  | -45(9) |
| C(6')  | 102(9)  | 125(11) | 98(9)   | -5(9)  | 50(8)  | -17(9) |
| C(2')  | 118(10) | 159(9)  | 117(10) | -3(9)  | 41(9)  | -40(9) |
| C(1')  | 124(9)  | 164(10) | 106(9)  | -12(8) | 45(8)  | -36(9) |
| C(7)   | 65(3)   | 62(3)   | 90(3)   | 9(2)   | 25(2)  | -1(2)  |
| C(8)   | 67(3)   | 69(3)   | 99(4)   | -8(3)  | 20(3)  | -18(2) |
| C(9)   | 79(3)   | 68(3)   | 87(3)   | -11(2) | 23(3)  | -16(2) |
| C(10)  | 59(3)   | 57(2)   | 75(3)   | -6(2)  | 16(2)  | -4(2)  |
| C(11)  | 58(2)   | 50(2)   | 68(3)   | 2(2)   | 15(2)  | 4(2)   |
| C(12)  | 67(3)   | 59(3)   | 80(3)   | -5(2)  | 17(2)  | 2(2)   |
| C(13)  | 56(2)   | 49(2)   | 69(3)   | 2(2)   | 12(2)  | 3(2)   |
| C(14)  | 59(2)   | 50(2)   | 61(2)   | 4(2)   | 12(2)  | 3(2)   |
| C(15)  | 68(3)   | 50(2)   | 62(2)   | -1(2)  | 15(2)  | 4(2)   |
| C(16)  | 71(3)   | 66(3)   | 69(3)   | -9(2)  | 19(2)  | -3(2)  |
| C(17)  | 74(3)   | 58(2)   | 60(2)   | 5(2)   | 9(2)   | 1(2)   |
| C(18)  | 65(3)   | 55(2)   | 59(2)   | -1(2)  | 15(2)  | 8(2)   |
| C(19)  | 60(3)   | 49(2)   | 59(2)   | -1(2)  | 15(2)  | 2(2)   |
| C(20)  | 60(3)   | 55(2)   | 58(2)   | 1(2)   | 18(2)  | 7(2)   |
| C(21)  | 54(2)   | 55(2)   | 63(2)   | -4(2)  | 17(2)  | 5(2)   |
| C(22)  | 61(3)   | 55(2)   | 68(3)   | -2(2)  | 17(2)  | 5(2)   |
| C(23)  | 66(3)   | 70(3)   | 74(3)   | -2(2)  | 21(2)  | -6(2)  |
| C(24)  | 66(3)   | 95(3)   | 90(4)   | -10(3) | 30(3)  | -10(2) |
| C(25)  | 58(3)   | 97(3)   | 71(3)   | -6(2)  | 23(2)  | -6(2)  |
| C(26)  | 56(3)   | 79(3)   | 64(3)   | -5(2)  | 15(2)  | 2(2)   |
| C(27)  | 61(3)   | 185(6)  | 76(3)   | -4(3)  | 22(3)  | -27(3) |

## SUPPORTING INFORMATION

|        |         |         |         |         |         |         |
|--------|---------|---------|---------|---------|---------|---------|
| C(28)  | 67(3)   | 189(6)  | 93(4)   | 16(4)   | 4(3)    | -33(4)  |
| Cl(1)  | 96(2)   | 204(4)  | 76(2)   | 10(2)   | 4(1)    | -32(2)  |
| C(29)  | 65(5)   | 211(9)  | 63(5)   | -12(5)  | 13(4)   | -41(5)  |
| C(30)  | 97(6)   | 235(10) | 74(5)   | 6(6)    | 1(5)    | -28(7)  |
| C(31)  | 106(7)  | 221(10) | 133(7)  | -11(7)  | -17(6)  | -70(7)  |
| C(32)  | 123(7)  | 171(9)  | 109(7)  | 12(7)   | -15(6)  | -54(7)  |
| Cl(1') | 240(12) | 345(16) | 224(12) | 141(11) | -113(9) | -86(11) |
| C(29') | 88(8)   | 231(11) | 69(8)   | 2(9)    | -11(8)  | -27(9)  |
| C(30') | 78(8)   | 238(12) | 97(9)   | 5(10)   | -13(8)  | -29(9)  |
| C(31') | 75(8)   | 238(12) | 85(8)   | 24(9)   | 24(7)   | -43(9)  |
| C(32') | 84(8)   | 213(11) | 87(8)   | 14(9)   | -3(7)   | -48(9)  |
| C(33)  | 70(3)   | 66(3)   | 66(3)   | 8(2)    | 8(2)    | 7(2)    |
| C(34)  | 71(3)   | 68(3)   | 71(3)   | -12(2)  | 27(2)   | -5(2)   |
| N(1)   | 67(2)   | 60(2)   | 77(2)   | -10(2)  | 20(2)   | -8(2)   |
| N(2)   | 65(2)   | 55(2)   | 63(2)   | 3(2)    | 14(2)   | -1(2)   |

**SI Table 10.** Hydrogen coordinates ( $\times 10^4$ ) and isotropic displacement parameters ( $\text{\AA}^2 \times 10^3$ ) for kgnks-r1\_sq.

|        | x    | y     | z    | U(eq) |
|--------|------|-------|------|-------|
| H(2)   | 7742 | 11566 | 5368 | 152   |
| H(3)   | 8198 | 12708 | 6254 | 145   |
| H(4)   | 7704 | 12002 | 6883 | 115   |
| H(6)   | 6241 | 9028  | 5720 | 137   |
| H(4')  | 7367 | 13897 | 6636 | 125   |
| H(3')  | 7693 | 14687 | 5916 | 152   |
| H(6')  | 6570 | 7017  | 5948 | 125   |
| H(2')  | 7473 | 11781 | 5153 | 156   |
| H(8)   | 7075 | 12854 | 7330 | 95    |
| H(9)   | 6601 | 12318 | 7942 | 94    |
| H(12)  | 6022 | 7117  | 6398 | 84    |
| H(16A) | 4674 | 7938  | 8302 | 83    |
| H(16B) | 5338 | 7217  | 8672 | 83    |
| H(17A) | 5210 | 2747  | 8335 | 81    |
| H(17B) | 4708 | 3416  | 8604 | 81    |
| H(23)  | 2990 | -1428 | 7589 | 84    |
| H(24)  | 2151 | -1803 | 6837 | 99    |

## SUPPORTING INFORMATION

|        |      |       |      |     |
|--------|------|-------|------|-----|
| H(26)  | 2815 | 4028  | 6106 | 80  |
| H(28)  | 2098 | 3176  | 5395 | 146 |
| H(30)  | 512  | -217  | 4672 | 170 |
| H(31)  | 565  | -2620 | 5433 | 200 |
| H(32)  | 1458 | -2491 | 6185 | 175 |
| H(30') | 282  | 2812  | 4880 | 177 |
| H(31') | 356  | 996   | 5693 | 160 |
| H(32') | 1260 | 979   | 6381 | 163 |
| H(33A) | 4173 | 7948  | 6496 | 106 |
| H(33B) | 3460 | 7669  | 6314 | 106 |
| H(33C) | 3848 | 5678  | 6088 | 106 |
| H(34A) | 4821 | 2988  | 6545 | 104 |
| H(34B) | 5471 | 3356  | 6487 | 104 |
| H(34C) | 4942 | 5337  | 6190 | 104 |

**SI Table 11.** Torsion angles [°] for kgnks-r1\_sq.

|                          |            |
|--------------------------|------------|
| C(6)-C(1)-C(2)-C(3)      | 4(2)       |
| Cl(2)-C(1)-C(2)-C(3)     | 179.4(10)  |
| C(1)-C(2)-C(3)-C(4)      | -1.5(19)   |
| C(2)-C(3)-C(4)-C(5)      | -1.1(16)   |
| C(6)-C(5)-C(4)-C(3)      | 1.0(12)    |
| C(7)-C(5)-C(4)-C(3)      | -179.5(7)  |
| C(4)-C(5)-C(6)-C(1)      | 1.8(14)    |
| C(7)-C(5)-C(6)-C(1)      | -177.8(8)  |
| C(2)-C(1)-C(6)-C(5)      | -4.4(18)   |
| Cl(2)-C(1)-C(6)-C(5)     | -179.6(9)  |
| C(6')-C(5)-C(4')-C(3')   | 3(3)       |
| C(7)-C(5)-C(4')-C(3')    | -169.9(12) |
| C(5)-C(4')-C(3')-C(2')   | -1(2)      |
| C(4')-C(5)-C(6')-C(1')   | -2(3)      |
| C(7)-C(5)-C(6')-C(1')    | 171.1(14)  |
| C(4')-C(3')-C(2')-C(1')  | -1.8(18)   |
| C(5)-C(6')-C(1')-C(2')   | -1(3)      |
| C(5)-C(6')-C(1')-Cl(2')  | -178.2(16) |
| C(3')-C(2')-C(1')-C(6')  | 3(3)       |
| C(3')-C(2')-C(1')-Cl(2') | -179.8(10) |
| C(4')-C(5)-C(7)-C(12)    | 162.2(13)  |
| C(6')-C(5)-C(7)-C(12)    | -10.5(14)  |

## SUPPORTING INFORMATION

|                         |           |
|-------------------------|-----------|
| C(6)-C(5)-C(7)-C(12)    | 21.9(9)   |
| C(4)-C(5)-C(7)-C(12)    | -157.6(6) |
| C(4')-C(5)-C(7)-C(8)    | -16.2(14) |
| C(6')-C(5)-C(7)-C(8)    | 171.1(14) |
| C(6)-C(5)-C(7)-C(8)     | -156.5(8) |
| C(4)-C(5)-C(7)-C(8)     | 24.0(8)   |
| C(12)-C(7)-C(8)-C(9)    | 0.4(7)    |
| C(5)-C(7)-C(8)-C(9)     | 178.9(5)  |
| C(7)-C(8)-C(9)-C(10)    | -0.1(8)   |
| C(8)-C(9)-C(10)-N(1)    | 176.0(4)  |
| C(8)-C(9)-C(10)-C(11)   | -1.6(7)   |
| N(1)-C(10)-C(11)-C(12)  | -174.6(4) |
| C(9)-C(10)-C(11)-C(12)  | 2.9(6)    |
| N(1)-C(10)-C(11)-C(13)  | 8.6(6)    |
| C(9)-C(10)-C(11)-C(13)  | -173.9(4) |
| C(8)-C(7)-C(12)-C(11)   | 1.0(6)    |
| C(5)-C(7)-C(12)-C(11)   | -177.5(4) |
| C(10)-C(11)-C(12)-C(7)  | -2.7(6)   |
| C(13)-C(11)-C(12)-C(7)  | 174.0(4)  |
| C(10)-C(11)-C(13)-C(14) | 1.5(5)    |
| C(12)-C(11)-C(13)-C(14) | -175.2(4) |
| C(10)-C(11)-C(13)-C(34) | -174.6(4) |
| C(12)-C(11)-C(13)-C(34) | 8.8(6)    |
| C(11)-C(13)-C(14)-C(15) | -10.7(5)  |
| C(34)-C(13)-C(14)-C(15) | 165.2(4)  |
| C(11)-C(13)-C(14)-C(19) | 173.3(3)  |
| C(34)-C(13)-C(14)-C(19) | -10.8(6)  |
| C(13)-C(14)-C(15)-N(1)  | 11.2(6)   |
| C(19)-C(14)-C(15)-N(1)  | -172.4(3) |
| C(13)-C(14)-C(15)-C(16) | -164.4(4) |
| C(19)-C(14)-C(15)-C(16) | 12.0(5)   |
| N(1)-C(15)-C(16)-C(17)  | -138.7(4) |
| C(14)-C(15)-C(16)-C(17) | 37.1(5)   |
| C(15)-C(16)-C(17)-C(18) | -61.0(5)  |
| C(16)-C(17)-C(18)-N(2)  | -137.6(4) |
| C(16)-C(17)-C(18)-C(19) | 36.9(5)   |
| N(2)-C(18)-C(19)-C(20)  | 10.1(6)   |
| C(17)-C(18)-C(19)-C(20) | -164.1(3) |
| N(2)-C(18)-C(19)-C(14)  | -173.4(3) |

SUPPORTING INFORMATION

|                           |            |
|---------------------------|------------|
| C(17)-C(18)-C(19)-C(14)   | 12.4(5)    |
| C(13)-C(14)-C(19)-C(20)   | -46.3(6)   |
| C(15)-C(14)-C(19)-C(20)   | 137.6(4)   |
| C(13)-C(14)-C(19)-C(18)   | 137.4(4)   |
| C(15)-C(14)-C(19)-C(18)   | -38.7(5)   |
| C(18)-C(19)-C(20)-C(21)   | -10.5(5)   |
| C(14)-C(19)-C(20)-C(21)   | 173.3(3)   |
| C(18)-C(19)-C(20)-C(33)   | 166.3(4)   |
| C(14)-C(19)-C(20)-C(33)   | -9.9(6)    |
| C(19)-C(20)-C(21)-C(26)   | -177.8(3)  |
| C(33)-C(20)-C(21)-C(26)   | 5.3(6)     |
| C(19)-C(20)-C(21)-C(22)   | 2.3(5)     |
| C(33)-C(20)-C(21)-C(22)   | -174.5(3)  |
| C(26)-C(21)-C(22)-N(2)    | -172.4(3)  |
| C(20)-C(21)-C(22)-N(2)    | 7.4(6)     |
| C(26)-C(21)-C(22)-C(23)   | 4.1(6)     |
| C(20)-C(21)-C(22)-C(23)   | -176.1(4)  |
| N(2)-C(22)-C(23)-C(24)    | 175.1(4)   |
| C(21)-C(22)-C(23)-C(24)   | -1.5(6)    |
| C(22)-C(23)-C(24)-C(25)   | -1.5(7)    |
| C(23)-C(24)-C(25)-C(26)   | 1.8(7)     |
| C(23)-C(24)-C(25)-C(27)   | -178.6(4)  |
| C(24)-C(25)-C(26)-C(21)   | 0.9(6)     |
| C(27)-C(25)-C(26)-C(21)   | -178.6(4)  |
| C(22)-C(21)-C(26)-C(25)   | -3.8(6)    |
| C(20)-C(21)-C(26)-C(25)   | 176.4(4)   |
| C(26)-C(25)-C(27)-C(28)   | 11.4(9)    |
| C(24)-C(25)-C(27)-C(28)   | -168.1(6)  |
| C(26)-C(25)-C(27)-C(32')  | -128.3(13) |
| C(24)-C(25)-C(27)-C(32')  | 52.2(14)   |
| C(26)-C(25)-C(27)-C(32)   | 171.9(8)   |
| C(24)-C(25)-C(27)-C(32)   | -7.6(10)   |
| C(25)-C(27)-C(28)-C(29)   | 175.2(8)   |
| C(32)-C(27)-C(28)-C(29)   | 13.9(13)   |
| C(32')-C(27)-C(28)-C(29') | -4.4(15)   |
| C(25)-C(27)-C(28)-C(29')  | -146.3(9)  |
| C(27)-C(28)-C(29)-C(30)   | -5.7(16)   |
| C(27)-C(28)-C(29)-Cl(1)   | -176.9(7)  |
| C(28)-C(29)-C(30)-C(31)   | -1(2)      |

## SUPPORTING INFORMATION

---

|                             |            |
|-----------------------------|------------|
| Cl(1)-C(29)-C(30)-C(31)     | 170.9(12)  |
| C(29)-C(30)-C(31)-C(32)     | -2(2)      |
| C(30)-C(31)-C(32)-C(27)     | 11(2)      |
| C(28)-C(27)-C(32)-C(31)     | -15.8(16)  |
| C(25)-C(27)-C(32)-C(31)     | -178.0(10) |
| C(27)-C(28)-C(29')-C(30')   | -15.4(18)  |
| C(27)-C(28)-C(29')-Cl(1')   | 173.6(8)   |
| C(28)-C(29')-C(30')-C(31')  | 17(2)      |
| Cl(1')-C(29')-C(30')-C(31') | -171.2(16) |
| C(29')-C(30')-C(31')-C(32') | 2(3)       |
| C(30')-C(31')-C(32')-C(27)  | -22(4)     |
| C(28)-C(27)-C(32')-C(31')   | 21(3)      |
| C(25)-C(27)-C(32')-C(31')   | 166.4(19)  |
| C(14)-C(15)-N(1)-C(10)      | -1.4(6)    |
| C(16)-C(15)-N(1)-C(10)      | 174.2(4)   |
| C(11)-C(10)-N(1)-C(15)      | -8.6(6)    |
| C(9)-C(10)-N(1)-C(15)       | 173.9(4)   |
| C(19)-C(18)-N(2)-C(22)      | -0.5(6)    |
| C(17)-C(18)-N(2)-C(22)      | 173.6(3)   |
| C(23)-C(22)-N(2)-C(18)      | 175.1(4)   |
| C(21)-C(22)-N(2)-C(18)      | -8.4(5)    |

---

Symmetry transformations used to generate equivalent atoms:
